# Supplementary material
Source: MDPI journal article supplement (https://www.mdpi.com/2073-4433/14/10/1525)
Supplement: s1 [file s1]

## Supplementary Material :

# Spatial Dependence Analysis of Weekly Moving Cumulative Rainfall Data for Flood Risk Assessment

Prapawan Chomphuwiset <sup>a</sup>, Tossapol Phoophiwfa<sup>a</sup>, Wanlop Kannika<sup>b</sup>,  
Palakorn Seenoi <sup>c</sup>, Sujitta Surapee <sup>a</sup>, Jeong-Soo Park <sup>d</sup>, and Piyapatr Busababodhin<sup>a</sup>

<sup>1</sup> <sup>a</sup> Digital Innovation Research Cluster for Integrated Disaster Management in the Watershed, Mahasarakham University, Kantharawichai, Maha Sarakham, Thailand;

<sup>b</sup>Water Management and Maintenance Division , Regional Irrigation Office 6 (RID 6), Khon Kaen, Thailand;

<sup>c</sup> Department of Statistics, Faculty of Science, Khon Kaen University, Khon Kaen, Thailand;

<sup>d</sup>Department of Statistics, Chonnam National University, Gwangju, Korea

October 1, 2023

# 1. The code of station, station name, provincial area

**Table S 1** Station ID, station name, provincial area, latitude, and longitude for each station.

| Station ID | Station Name                 | Province          | Latitude | Longitude |
|------------|------------------------------|-------------------|----------|-----------|
| ST1        | Loei                         | Loei              | 17°45'   | 101°73'   |
| ST2        | Loei Agromet*                | Loei              | 17°40'   | 101°73'   |
| ST3        | Udon Thani                   | Udon Thani        | 17°38'   | 102°80'   |
| ST4        | Nong Bua Lamphu              | Nong Bua Lamphu   | 16°24'   | 101°94'   |
| ST5        | Khon Kaen                    | Khon Kaen         | 17°25'   | 102°98'   |
| ST6        | Tha Phra Agromet*            | Khon Kaen         | 16°33'   | 102°82'   |
| ST7        | Mukdahan                     | Mukdahan          | 16°53'   | 104°72'   |
| ST8        | Maha Sarakham                | Maha Sarakham     | 17°07'   | 103°15'   |
| ST9        | Kalasin                      | Kalasin           | 16°24'   | 102°78'   |
| ST10       | Chaiyaphum                   | Chaiyaphum        | 15°80'   | 102°03'   |
| ST11       | Roi Et                       | Roi Et            | 16°05'   | 103°68'   |
| ST12       | Roi Et Agromet*              | Roi Et            | 16°07'   | 103°62'   |
| ST13       | Ubon Ratchathani<br>Agromet* | Ubon Ratchathani  | 15°93'   | 105°60'   |
| ST14       | Ubon Ratchathani             | Ubon Ratchathani  | 15°25'   | 104°87'   |
| ST15       | Sisaket                      | Sisaket           | 15°03'   | 104°25'   |
| ST16       | Nakhon Ratchasima            | Nakhon Ratchasima | 15°72'   | 102°67'   |
| ST17       | Pak Chong Agromet*           | Nakhon Ratchasima | 15°27'   | 101°57'   |
| ST18       | Chok Chai                    | Nakhon Ratchasima | 14°85'   | 102°28'   |

\* is Sub-station of the Meteorological Department for agriculture.

## 2. Descriptive statistics of each station

**Table S 2** Station ID, descriptive statistics of weekly moving cumulative rainfall data (unit: mm.) in the Chi watershed of Thailand.  $Q_1$  and  $Q_3$  is 25<sup>th</sup> and 75<sup>th</sup> percentile, respectively.

| Station ID | Season | Min   | $Q_1$  | Median | $Q_3$  | Max     | IQR    |
|------------|--------|-------|--------|--------|--------|---------|--------|
| ST1        | Winter | 0.020 | 1.800  | 8.200  | 21.700 | 124.500 | 19.900 |
|            | Rainy  | 0.100 | 8.050  | 18.650 | 34.075 | 164.100 | 26.025 |
|            | Summer | 0.020 | 3.025  | 9.450  | 24.225 | 96.000  | 21.200 |
| ST2        | Winter | 0.020 | 1.500  | 7.200  | 20.850 | 128.300 | 19.350 |
|            | Rainy  | 0.100 | 7.700  | 17.550 | 33.525 | 164.400 | 25.825 |
|            | Summer | 0.020 | 3.600  | 11.500 | 24.550 | 114.400 | 20.950 |
| ST3        | Winter | 0.020 | 0.800  | 6.250  | 19.275 | 144.700 | 18.475 |
|            | Rainy  | 0.020 | 12.800 | 23.700 | 41.800 | 274.500 | 29.000 |
|            | Summer | 0.020 | 2.175  | 9.150  | 23.950 | 158.300 | 21.775 |
| ST4        | Winter | 0.010 | 1.625  | 7.200  | 18.750 | 177.800 | 17.125 |
|            | Rainy  | 0.400 | 12.000 | 20.800 | 38.425 | 180.300 | 26.425 |
|            | Summer | 0.020 | 3.275  | 9.450  | 25.450 | 94.000  | 22.175 |
| ST5        | Winter | 0.010 | 1.175  | 6.350  | 22.875 | 99.200  | 21.700 |
|            | Rainy  | 0.100 | 8.300  | 20.300 | 37.450 | 196.300 | 29.150 |
|            | Summer | 0.020 | 2.825  | 9.850  | 26.900 | 221.900 | 24.075 |
| ST6        | Winter | 0.020 | 1.300  | 7.300  | 23.100 | 141.400 | 21.800 |
|            | Rainy  | 0.020 | 8.350  | 19.200 | 36.200 | 200.400 | 27.850 |
|            | Summer | 0.020 | 2.975  | 9.950  | 27.100 | 164.200 | 24.125 |
| ST7        | Winter | 0.010 | 1.100  | 4.950  | 17.375 | 96.400  | 16.275 |
|            | Rainy  | 0.001 | 12.100 | 26.700 | 48.400 | 269.400 | 36.300 |
|            | Summer | 0.100 | 2.600  | 10.550 | 25.725 | 134.500 | 23.125 |
| ST8        | Winter | 0.010 | 2.400  | 7.150  | 21.100 | 149.500 | 18.700 |
|            | Rainy  | 0.020 | 10.600 | 22.200 | 39.700 | 183.700 | 29.100 |
|            | Summer | 0.020 | 2.975  | 11.350 | 25.900 | 177.000 | 22.925 |
| ST9        | Winter | 0.001 | 0.875  | 8.800  | 25.525 | 114.300 | 24.650 |
|            | Rainy  | 0.020 | 8.250  | 21.000 | 38.800 | 157.100 | 30.550 |
|            | Summer | 0.020 | 2.400  | 9.400  | 22.900 | 134.900 | 20.500 |

**Table S 3** Station ID, descriptive statistics of weekly moving cumulative rainfall data (unit: mm.) in the Chi watershed of Thailand.  $Q_1$  and  $Q_3$  is 25<sup>th</sup> and 75<sup>th</sup> percentile, respectively (Cont.).

| Station ID | Season | Min   | $Q_1$  | Median | $Q_3$  | Max     | IQR    |
|------------|--------|-------|--------|--------|--------|---------|--------|
| ST10       | Winter | 0.020 | 1.600  | 8.300  | 27.200 | 88.400  | 25.600 |
|            | Rainy  | 0.020 | 6.550  | 17.000 | 33.950 | 148.300 | 27.400 |
|            | Summer | 0.020 | 3.500  | 10.600 | 27.900 | 162.500 | 24.400 |
| ST11       | Winter | 0.001 | 1.300  | 6.000  | 22.400 | 92.700  | 21.100 |
|            | Rainy  | 0.020 | 10.800 | 22.900 | 41.000 | 198.600 | 30.200 |
|            | Summer | 0.100 | 3.550  | 11.400 | 25.100 | 109.300 | 21.550 |
| ST12       | Winter | 0.020 | 1.400  | 6.300  | 23.000 | 107.000 | 21.600 |
|            | Rainy  | 0.020 | 9.700  | 21.900 | 42.475 | 201.300 | 32.775 |
|            | Summer | 0.020 | 2.800  | 11.000 | 26.100 | 118.400 | 23.300 |
| ST13       | Winter | 0.020 | 0.950  | 7.100  | 24.200 | 160.800 | 23.250 |
|            | Rainy  | 0.100 | 12.500 | 26.700 | 45.900 | 254.300 | 33.400 |
|            | Summer | 0.020 | 1.900  | 9.400  | 23.200 | 135.400 | 21.300 |
| ST14       | Winter | 0.010 | 1.100  | 6.800  | 23.100 | 172.600 | 22.000 |
|            | Rainy  | 0.020 | 13.500 | 27.600 | 45.300 | 190.000 | 31.800 |
|            | Summer | 0.020 | 1.775  | 10.650 | 28.050 | 116.700 | 26.275 |
| ST15       | Winter | 0.020 | 1.500  | 8.550  | 28.425 | 118.600 | 26.925 |
|            | Rainy  | 0.020 | 12.100 | 25.000 | 45.200 | 263.400 | 33.100 |
|            | Summer | 0.020 | 2.600  | 9.000  | 22.900 | 127.500 | 20.300 |
| ST16       | Winter | 0.001 | 1.100  | 6.700  | 23.625 | 141.500 | 22.525 |
|            | Rainy  | 0.020 | 5.625  | 15.850 | 31.675 | 152.800 | 26.050 |
|            | Summer | 0.020 | 2.525  | 9.400  | 24.425 | 107.300 | 21.900 |
| ST17       | Winter | 0.010 | 2.400  | 8.800  | 21.800 | 145.900 | 19.400 |
|            | Rainy  | 0.020 | 5.950  | 13.500 | 25.450 | 112.700 | 19.500 |
|            | Summer | 0.020 | 5.900  | 14.450 | 29.300 | 80.400  | 23.400 |
| ST18       | Winter | 0.010 | 1.550  | 9.700  | 21.700 | 122.800 | 20.150 |
|            | Rainy  | 0.020 | 6.100  | 14.600 | 30.400 | 116.200 | 24.300 |
|            | Summer | 0.020 | 2.350  | 8.900  | 23.225 | 147.500 | 20.875 |

### 3. Marginal Probability Distribution

**Table S 4** Bivariate Generalized Extreme Value (BGEV) Copula models.

| BGEV Model                                           | Model function                                                                                                                                                                                                 | parameter                                                         |
|------------------------------------------------------|----------------------------------------------------------------------------------------------------------------------------------------------------------------------------------------------------------------|-------------------------------------------------------------------|
| Bivariate logistic (Log) [4]                         | $G(x_1, x_2) = \exp\{-(y_1^{(\frac{1}{r})} + y_2^{(\frac{1}{r})})^r\}$                                                                                                                                         | $r$ ,<br>when $0 < r < 1$                                         |
| Bivariate asymmetric logistic (Alog) [8]             | $G(x_1, x_2) = \exp\{-(1-t_1)y_1 - (1-t_2)y_2 - [(t_1y_1)^{(\frac{1}{r})} + (t_2y_2)^{(\frac{1}{r})}]^r\}$                                                                                                     | $r, t_1, t_2$ ,<br>when $0 < r < 1$ ,<br>$0 \leq t_1, t_2 \leq 1$ |
| Husler-Reiss (HR) [5]                                | $G(x_1, x_1) = \exp\{-y_1\Phi(r^{-1} + r[\log(y_1/y_2)]/2) - y_2\Phi(r^{-1} + r[\log(y_2/y_1)]/2)\}$<br>$\Phi(\cdot)$ is the standard normal distribution function                                             | $r$ ,<br>when $r > 0$ ,                                           |
| Bivariate negative logistic (Neglog) [3]             | $G(x_1, x_2) = \exp\{-y_1 - y_2 + [y_1^{-r} + y_2^{-r}]^{-\frac{1}{r}}\}$                                                                                                                                      | $r$ ,<br>when $r > 0$                                             |
| Bivariate asymmetric negative logistic (Aneglog) [6] | $G(x_1, x_2) = \exp\{-y_1 - y_2 + [(t_1y_1)^{-r} + (t_2y_2)^{-r}]^{-\frac{1}{r}}\}$                                                                                                                            | $r, t_1, t_2$ ,<br>when $r > 0$ ,<br>$0 < t_1, t_2 \leq 1$        |
| Bilogistic (Bilog) [7]                               | $G(x_1, x_2) = \exp\{-y_1q^{(1-\alpha)} - y_2(1-q)^{(1-\beta)}\}$ ,<br>when $q = q(y_1, y_2; \alpha, \beta)$ is the root of the equation                                                                       | $\alpha, \beta$ ,<br>when $0 < \alpha$ ,<br>$\beta < 1$           |
| Negative bilogistic (Negbilog) [2]                   | $G(x_1, x_2) = \exp\{-y_1 - y_2 + y_1q^{(1+\alpha)} - y_2(1-q)^{(1+\beta)}\}$<br>when $q = q(y_1, y_2; \alpha, \beta)$ is the root of the equation                                                             | $\alpha, \beta$ ,<br>when $\alpha > 0$ ,<br>$\beta > 0$           |
| Coles-Tawn (CT) [1]                                  | $G(x_1, x_2) = \exp\{-y_i[1 - Be(q; \alpha + 1, \beta)] - y_j[1 - Be(q; \alpha, \beta + 1)]\}$<br>when $Be(q; \alpha, \beta)$ is beta distribution function and<br>$q = \alpha y_2 / (\alpha y_2 + \beta y_1)$ | $\alpha > 0, \beta > 0$                                           |
| Asymmetric mixed (Amix) [8]                          | $G(x_1, x_2) = \exp\{-(y_1 + y_2)A[y_1/(y_1 + y_2)]\}$<br>when $A(t) = 1 - (\alpha + \beta)t + \alpha t^2 + \beta t^3$                                                                                         | $\alpha, \beta$                                                   |

**Table S 5** The estimated parameters with standard error (S.E.) in the parenthesis obtained from the local GEV distribution.

| Station ID | Parameters estimated |                      |                     | p-value of<br>K-S test | p-value of<br>AD-test |
|------------|----------------------|----------------------|---------------------|------------------------|-----------------------|
|            | $\hat{\mu}$ (S.E)    | $\hat{\sigma}$ (S.E) | $\hat{\xi}$ (S.E)   |                        |                       |
| ST1        | 75.5746<br>(5.0573)  | 25.5525<br>(3.5681)  | -0.1006<br>(0.1250) | 0.9990                 | 0.9995                |
| ST2        | 68.5938<br>(3.6509)  | 17.4737<br>(3.0934)  | 0.2978<br>(0.1865)  | 0.9423                 | 0.9766                |
| ST3        | 74.7970<br>(4.2675)  | 21.4082<br>(3.4333)  | 0.2370<br>(0.1403)  | 0.6022                 | 0.8051                |
| ST5        | 67.3990<br>(3.3974)  | 15.3984<br>(3.0158)  | 0.3794<br>(0.2304)  | 0.7857                 | 0.9035                |
| ST6        | 73.2417<br>(5.1869)  | 25.5539<br>(3.8961)  | 0.0622<br>(0.1500)  | 0.9980                 | 0.9984                |
| ST7        | 88.0520<br>(3.1801)  | 15.8494<br>(2.3610)  | 0.0544<br>(0.1414)  | 0.7239                 | 0.8712                |
| ST8        | 79.6809<br>(4.7731)  | 23.4542<br>(3.6167)  | 0.0824<br>(0.1539)  | 0.9091                 | 0.9726                |
| ST10       | 69.8512<br>(4.2727)  | 22.0165<br>(2.9297)  | -0.0780<br>(0.1045) | 0.7046                 | 0.6693                |
| ST11       | 79.8083<br>(4.8303)  | 24.0326<br>(3.6973)  | 0.1274<br>(0.1455)  | 0.8621                 | 0.9369                |
| ST12       | 84.1249<br>(4.9039)  | 24.7573<br>(3.6367)  | 0.0863<br>(0.1274)  | 0.7437                 | 0.8171                |
| ST13       | 82.5130<br>(3.9918)  | 18.8210<br>(3.3238)  | 0.2573<br>(0.1961)  | 0.9840                 | 0.9875                |
| ST14       | 99.9981<br>(5.2999)  | 26.5540<br>(3.8144)  | -0.2233<br>(0.1377) | 0.9978                 | 0.9990                |
| ST15       | 88.2148<br>(4.6011)  | 21.3305<br>(3.9670)  | 0.3286<br>(0.2104)  | 0.9816                 | 0.9546                |
| ST16       | 62.2648<br>(3.0145)  | 14.3250<br>(2.6126)  | 0.3351<br>(0.1950)  | 0.8785                 | 0.9437                |
| ST17       | 60.0285<br>(3.8512)  | 19.7394<br>(2.8925)  | -0.4334<br>(0.1270) | 0.9583                 | 0.9835                |
| ST18       | 60.2175<br>(2.7763)  | 13.6117<br>(2.0792)  | 0.0453<br>(0.1568)  | 0.7911                 | 0.8941                |

#### 4. Kendall's Tau correlation coefficient between variables at 14 stations in the Chi watershed

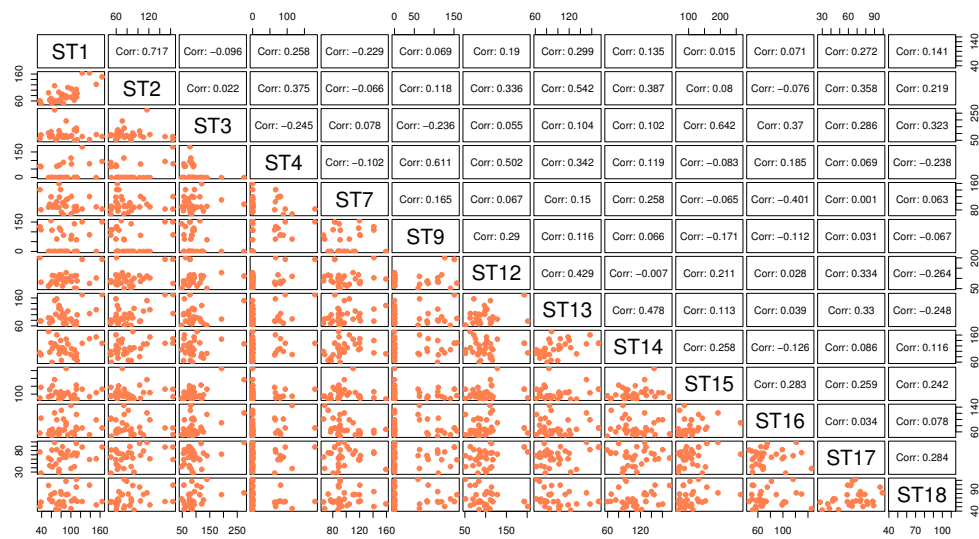

**Figure S 1** The correlation coefficient between the AMWMCR data at 14 stations in the rainy season.

## 5. The Bivariate Generalized Extreme Value Copula Function Fitting

**Table S 6** The best copula of BGEV models for each stations.

| Station ID |      | $\tau$  | Copula function | AIC      | BIC      |
|------------|------|---------|-----------------|----------|----------|
| ST1        | ST2  | 0.4516  | HR              | 592.2669 | 602.5271 |
|            | ST3  | -0.0585 | Neglog          | 624.4946 | 634.7547 |
|            | ST7  | -0.1374 | Neglog          | 598.8161 | 609.0763 |
|            | ST12 | 0.1253  | Amix            | 625.3961 | 635.7103 |
|            | ST13 | 0.0343  | Bilog           | 613.7017 | 624.6972 |
|            | ST14 | 0.0020  | Bilog           | 620.3763 | 631.3401 |
|            | ST15 | 0.0303  | Bilog           | 626.9858 | 637.6750 |
|            | ST16 | 0.1253  | HR              | 602.1177 | 612.3779 |
|            | ST17 | 0.1796  | Log             | 593.5847 | 603.8449 |
|            | ST18 | 0.1212  | HR              | 588.4411 | 598.7013 |
| ST2        | ST3  | -0.0303 | Bilog           | 614.6293 | 624.9086 |
|            | ST7  | -0.0444 | Neglog          | 588.9781 | 599.2382 |
|            | ST12 | 0.0768  | Alog            | 611.7820 | 624.9737 |
|            | ST13 | 0.2644  | Aneglog         | 598.2194 | 608.8195 |
|            | ST14 | 0.2644  | Bilog           | 605.7821 | 617.5080 |
|            | ST15 | 0.0182  | HR              | 617.4754 | 627.7355 |
|            | ST16 | -0.0283 | Aneglog         | 592.4943 | 602.7545 |
|            | ST17 | 0.1837  | HR              | 579.9361 | 590.1962 |
|            | ST18 | 0.2222  | HR              | 577.0809 | 587.3410 |
| ST3        | ST7  | 0.0243  | HR              | 599.5960 | 609.8561 |
|            | ST12 | 0.1132  | Log             | 629.0429 | 639.3030 |
|            | ST13 | -0.0545 | Aneglog         | 617.3901 | 628.0586 |
|            | ST14 | -0.0141 | HR              | 622.6576 | 632.9178 |
|            | ST15 | 0.2162  | Negbilog        | 618.6545 | 628.9335 |
|            | ST16 | 0.2224  | Bilog           | 596.3879 | 608.1138 |
|            | ST17 | 0.0263  | Bilog           | 588.9147 | 600.6406 |
|            | ST18 | 0.2103  | HR              | 585.9067 | 596.1669 |
| ST7        | ST12 | -0.0668 | Neglog          | 603.3468 | 613.6069 |
|            | ST13 | 0.1173  | HR              | 591.0313 | 601.2914 |
|            | ST14 | 0.2063  | Log             | 594.4840 | 604.7441 |
|            | ST15 | -0.0485 | Bilog           | 602.3518 | 612.9302 |
|            | ST16 | -0.2530 | Neglog          | 577.5551 | 587.8152 |
|            | ST17 | 0.0485  | HR              | 570.2953 | 580.5554 |
|            | ST18 | 0.0911  | Log             | 563.9659 | 574.2260 |



**Table S 7** The best copula of BGEV models for each stations (Cont.)

| Station ID |      | $\tau$  | Copula function | AIC      | BIC      |
|------------|------|---------|-----------------|----------|----------|
| ST12       | ST13 | 0.1820  | Alog            | 612.6844 | 625.3945 |
|            | ST14 | -0.0283 | Neglog          | 626.5518 | 636.8119 |
|            | ST15 | 0.1294  | HR              | 630.9662 | 641.2263 |
|            | ST16 | 0.1437  | HR              | 606.9151 | 617.1752 |
|            | ST17 | 0.2063  | Bilog           | 595.7195 | 606.6801 |
|            | ST18 | -0.1235 | Neglog          | 593.5595 | 603.8197 |
| ST13       | ST14 | 0.3778  | HR              | 607.2167 | 617.4769 |
|            | ST15 | 0.0343  | Aneglog         | 619.8255 | 630.7941 |
|            | ST16 | 0.0162  | Bilog           | 595.6928 | 605.9961 |
|            | ST17 | 0.1677  | HR              | 583.8161 | 594.2904 |
|            | ST18 | -0.1901 | Neglog          | 582.3480 | 592.6081 |
|            | ST15 | 0.1556  | Neglog          | 623.6716 | 633.9318 |
| ST14       | ST16 | -0.0890 | Neglog          | 600.6008 | 610.8609 |
|            | ST17 | 0.0465  | Neglog          | 593.3240 | 603.5841 |
|            | ST18 | 0.0647  | Log             | 586.0465 | 596.3067 |
|            | ST16 | 0.2831  | Bilog           | 599.5853 | 611.3112 |
| ST15       | ST17 | 0.2040  | Bilog           | 589.2606 | 600.9864 |
|            | ST18 | 0.1658  | Bilog           | 589.7736 | 600.6219 |
|            | ST17 | 0.0809  | Bilog           | 571.2501 | 582.9760 |
| ST16       | ST18 | 0.0223  | Log             | 567.2195 | 577.4797 |
|            | ST18 | 0.1658  | Bilog           | 557.5417 | 568.3818 |

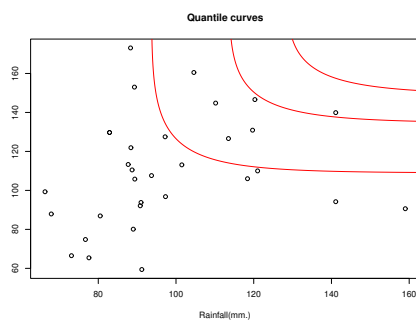

**(a)** ST1-ST2.

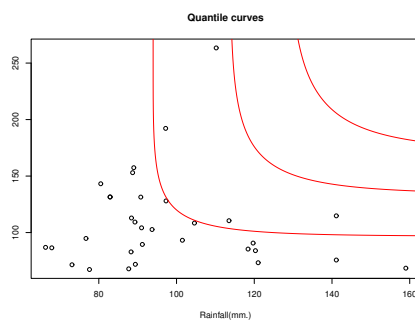

**(b)** ST1-ST3.

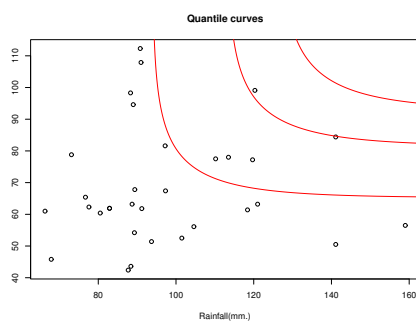

**(c)** ST1-ST7.

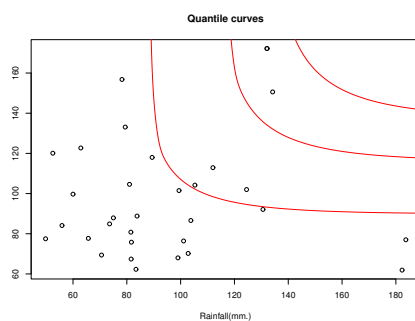

**(d)** ST1-ST12.

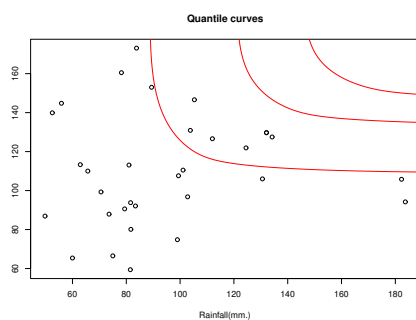

**(e)** ST1-ST13.

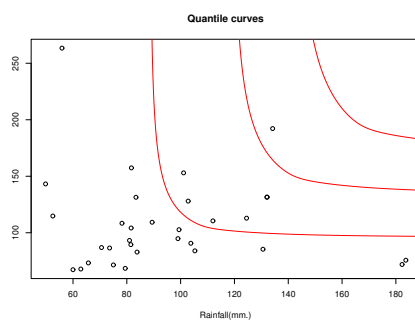

**(f)** ST1-ST14.

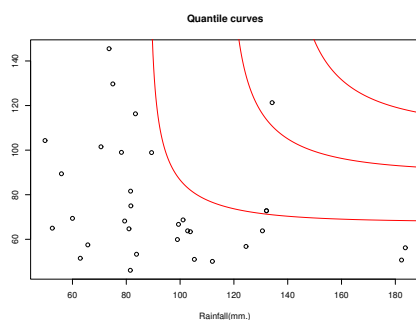

**(g)** ST1-ST15.

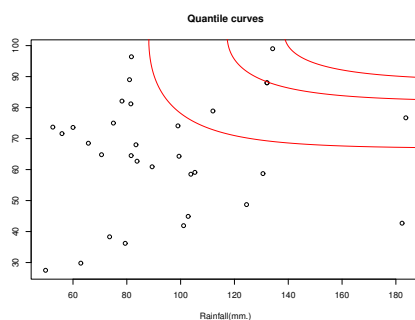

**(h)** ST1-ST16.

**Figure S 2** Quantile plots ( $p = 0.50, 0.95$  and  $0.99$ ) of the best model for each pair-stations.

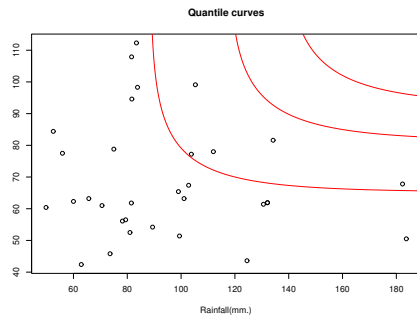

**(a)** ST1-ST17

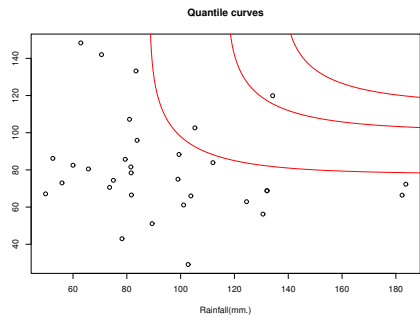

**(b)** ST1-ST8

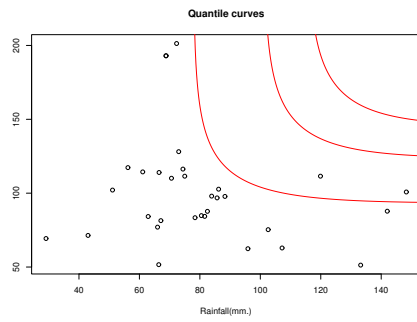

**(c)** ST2-ST3

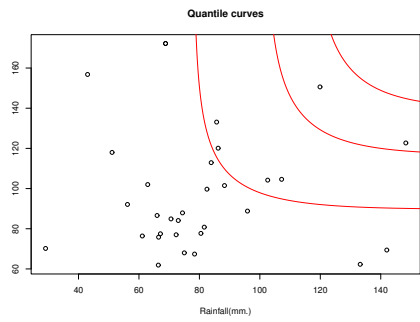

**(d)** ST2-ST5

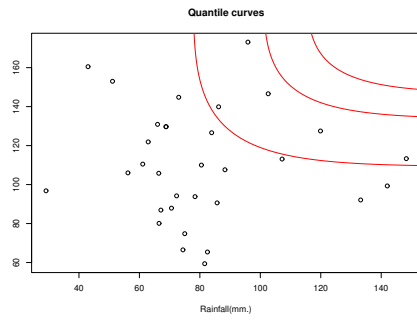

**(e)** ST2-ST6.

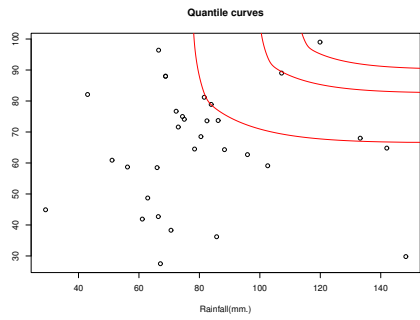

**(f)** ST2-ST7.

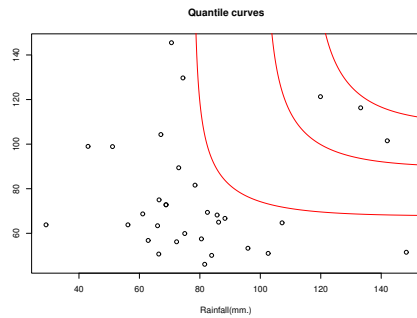

**(g)** ST2-ST8.

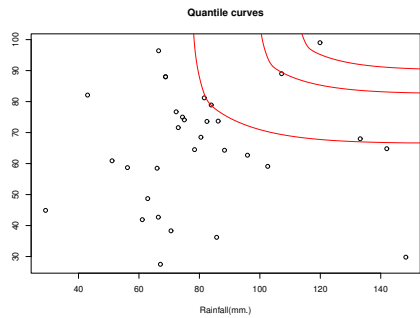

**(h)** ST2-ST10

**Figure S 3** Quantile plots ( $p = 0.50, 0.95$  and  $0.99$ ) of the best model for each pair-stations.

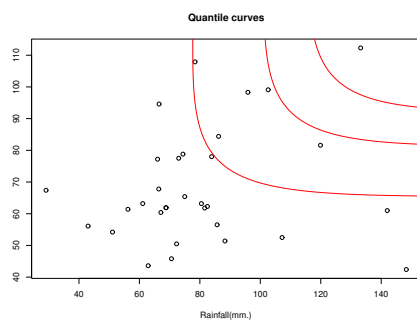

**(a)** ST2-ST11

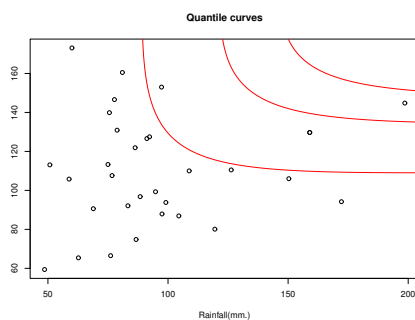

**(b)** ST2-ST12

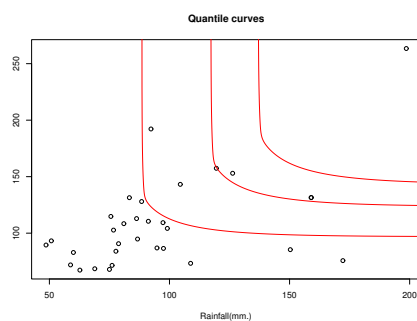

**(c)** ST2-ST13

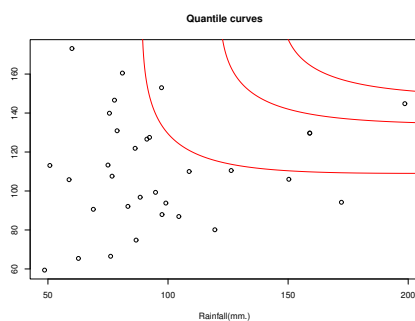

**(d)** ST2-ST14

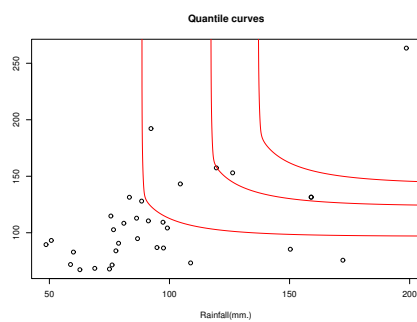

**(e)** ST2-ST15

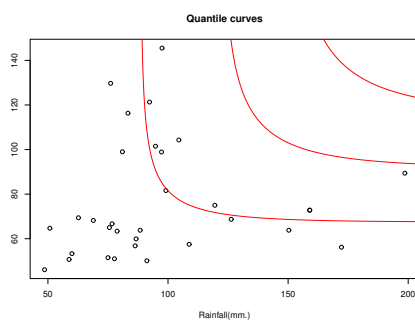

**(f)** ST2-ST16

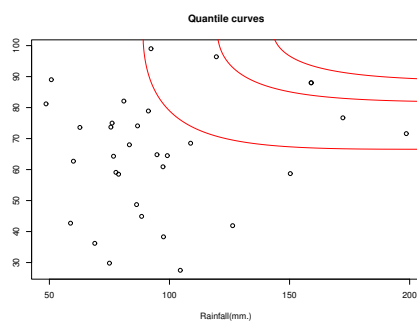

**(g)** ST2-ST17

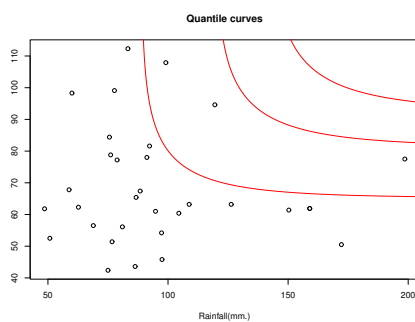

**(h)** ST2-ST18

**Figure S 4** Quantile plots ( $p = 0.50, 0.95$  and  $0.99$ ) of the best model for each pair-stations.

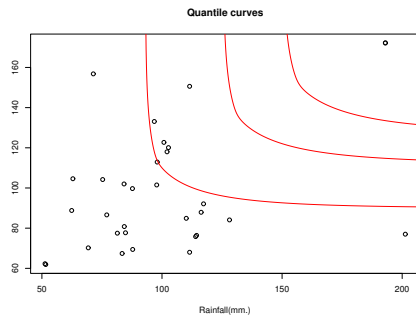

**(a) ST3-ST5**

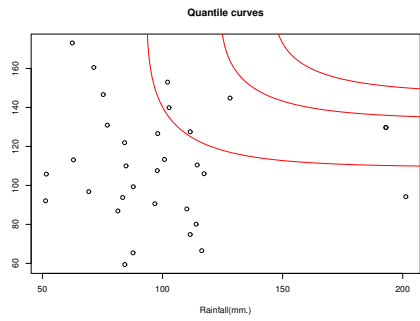

**(b) ST3-ST6**

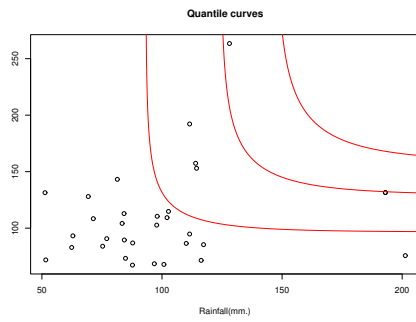

**(c) ST3-ST7**

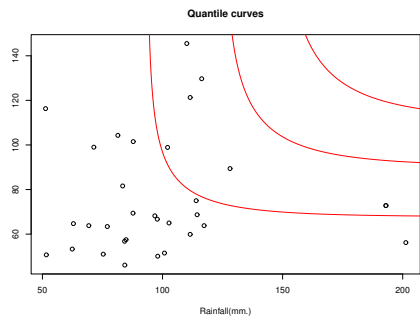

**(d) ST3-ST8**

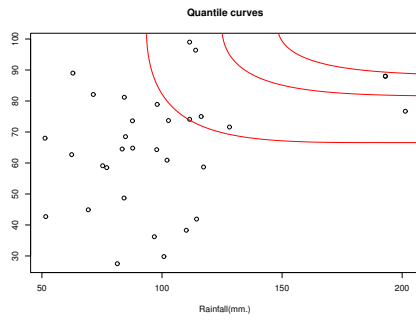

**(e) ST3-ST10**

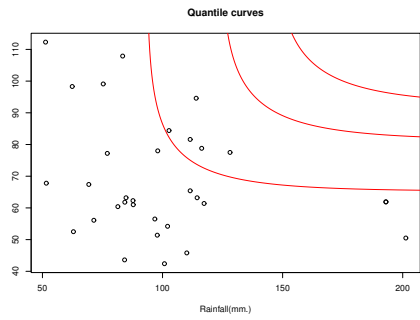

**(f) ST3-ST11**

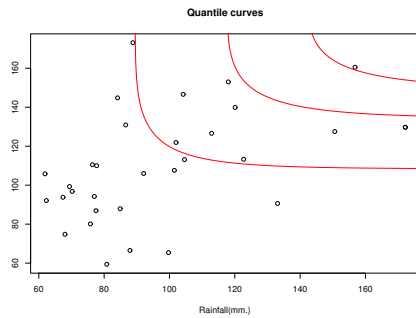

**(g) ST3-ST12**

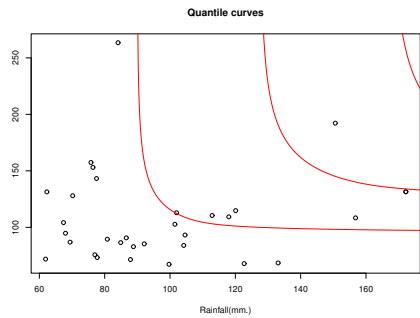

**(h) ST3-ST13**

**Figure S 5** Quantile plots ( $p = 0.50, 0.95$  and  $0.99$ ) of the best model for each pair-stations.

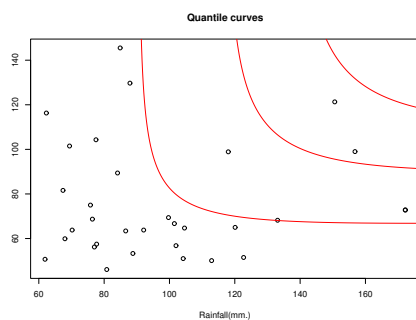

**(a)** ST3-ST14

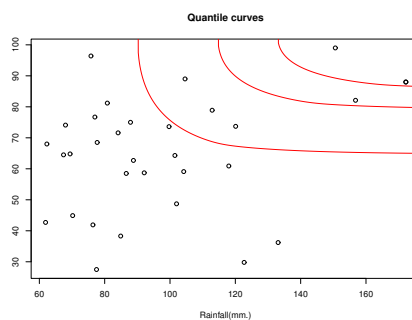

**(b)** ST3-ST15

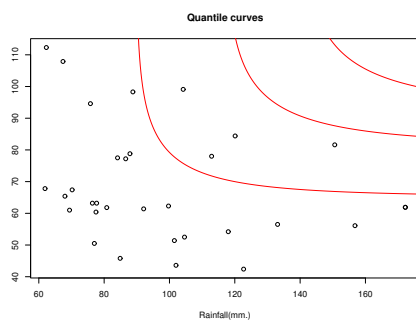

**(c)** ST3-ST16

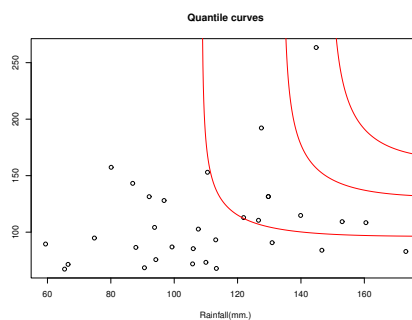

**(d)** ST3-ST17

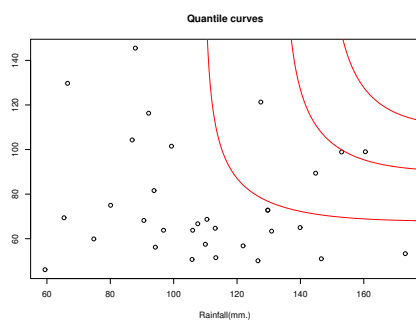

**(e)** ST3-ST18

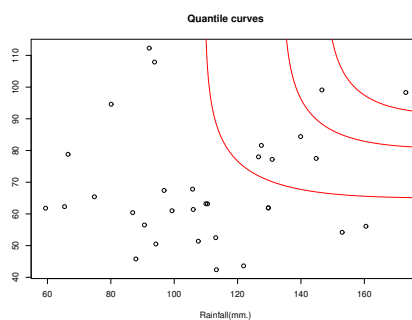

**(f)** ST5-ST7

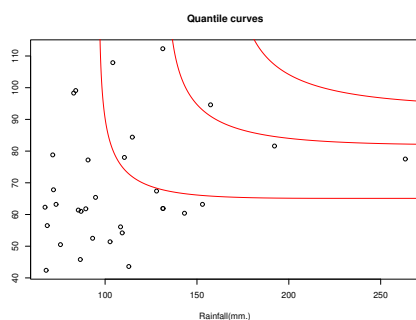

**(g)** ST5-ST12

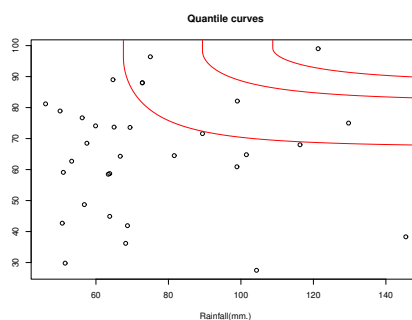

**(h)** ST5-ST13

**Figure S 6** Quantile plots ( $p = 0.50, 0.95$  and  $0.99$ ) of the best model for each pair-stations.

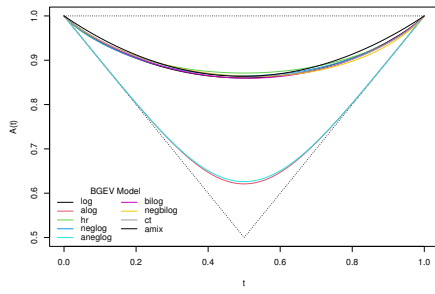

(a) ST1-ST2.

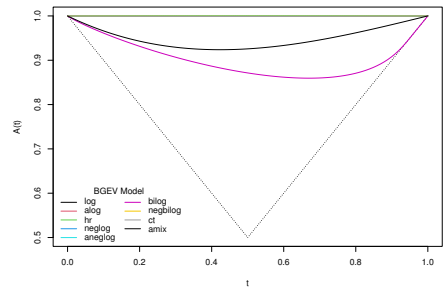

(b) ST1-ST3.

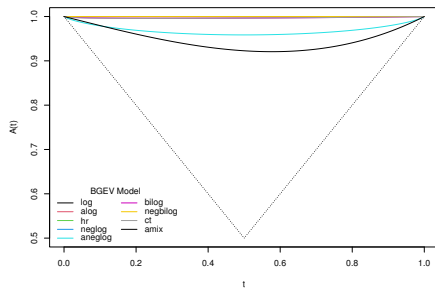

(c) ST1-ST5.

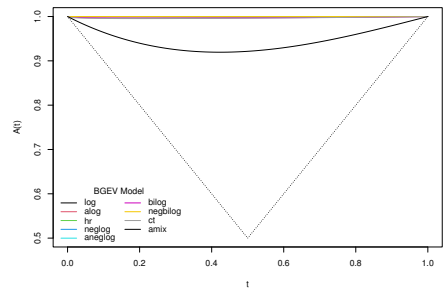

(d) ST1-ST6.

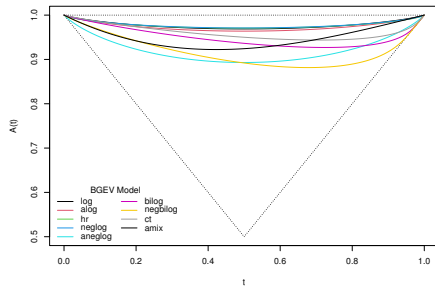

(e) ST1-ST7.

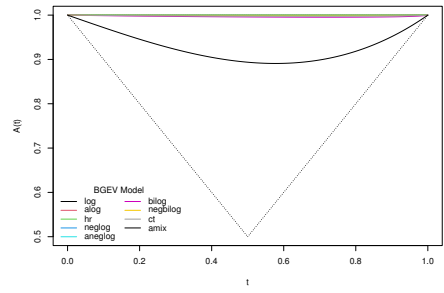

(f) ST1-ST8.

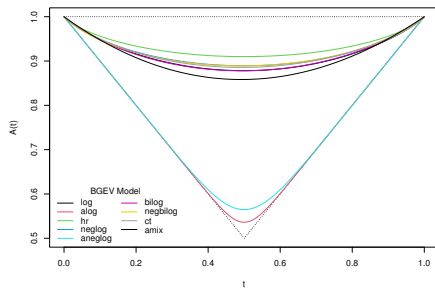

(g) ST1-ST10.

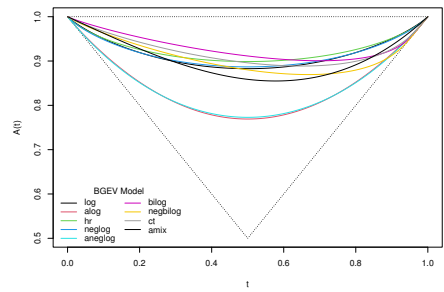

(h) ST1-ST11.

**Figure S 7** Dependence functions from BGEV models for each pair-stations.

## 6. Risk Analysis based on the BGEV model

**Table S 8** Return level of rainfall (mm.) and flood risk by regions for each return period.

| Region  | Return Period(Year) | Rainfall by region (mm.) |          | $T_{and}$ | Risk |
|---------|---------------------|--------------------------|----------|-----------|------|
|         |                     | region 1                 | region 2 |           |      |
| ST1-ST2 | 2                   | 83.80                    | 74.95    | 2.66      | 1.00 |
|         | 5                   | 110.24                   | 104.28   | 8.49      | 0.98 |
|         | 10                  | 122.16                   | 121.27   | 15.02     | 0.89 |
|         | 25                  | 148.69                   | 160.64   | 50.14     | 0.48 |
|         | 50                  | 156.60                   | 164.21   | 65.77     | 0.39 |
|         | 100                 | 160.35                   | 164.31   | 74.78     | 0.35 |
| ST1-ST3 | 2                   | 83.80                    | 84.20    | 4.04      | 1.00 |
|         | 5                   | 110.24                   | 111.68   | 22.96     | 0.76 |
|         | 10                  | 122.16                   | 126.36   | 57.98     | 0.43 |
|         | 25                  | 148.69                   | 179.90   | 787.00    | 0.04 |
|         | 50                  | 156.60                   | 223.72   | 2832.54   | 0.01 |
|         | 100                 | 160.35                   | 249.11   | 5363.16   | 0.01 |
| ST1-ST4 | 2                   | 83.80                    | 75.15    | 4.16      | 1.00 |
|         | 5                   | 110.24                   | 97.98    | 23.69     | 0.75 |
|         | 10                  | 122.16                   | 119.55   | 74.80     | 0.35 |
|         | 25                  | 148.69                   | 132.60   | 386.01    | 0.08 |
|         | 50                  | 156.60                   | 157.86   | 1034.19   | 0.03 |
|         | 100                 | 160.35                   | 177.08   | 1827.91   | 0.02 |
| ST1-ST5 | 2                   | 83.80                    | 84.80    | 4.12      | 1.00 |
|         | 5                   | 110.24                   | 109.68   | 21.47     | 0.78 |
|         | 10                  | 122.16                   | 134.73   | 79.77     | 0.33 |
|         | 25                  | 148.69                   | 152.38   | 522.25    | 0.06 |
|         | 50                  | 156.60                   | 172.19   | 1510.74   | 0.02 |
|         | 100                 | 160.35                   | 186.30   | 2891.81   | 0.01 |
| ST1-ST6 | 2                   | 83.80                    | 90.90    | 3.44      | 1.00 |
|         | 5                   | 110.24                   | 117.42   | 30.66     | 0.65 |
|         | 10                  | 122.16                   | 120.93   | 61.28     | 0.41 |
|         | 25                  | 148.69                   | 141.10   | 658.69    | 0.05 |
|         | 50                  | 156.60                   | 147.90   | 1452.81   | 0.02 |
|         | 100                 | 160.35                   | 153.45   | 2395.31   | 0.01 |
| ST1-ST7 | 2                   | 83.80                    | 83.60    | 3.13      | 1.00 |
|         | 5                   | 110.24                   | 122.00   | 18.05     | 0.84 |
|         | 10                  | 122.16                   | 132.10   | 32.62     | 0.63 |
|         | 25                  | 148.69                   | 170.76   | 159.56    | 0.18 |
|         | 50                  | 156.60                   | 182.83   | 246.30    | 0.12 |
|         | 100                 | 160.35                   | 183.27   | 267.80    | 0.11 |
| ST1-ST8 | 2                   | 83.80                    | 74.70    | 3.53      | 1.00 |
|         | 5                   | 110.24                   | 94.38    | 18.00     | 0.84 |
|         | 10                  | 122.16                   | 118.63   | 95.23     | 0.29 |
|         | 25                  | 148.69                   | 139.89   | 1165.41   | 0.03 |
|         | 50                  | 156.60                   | 144.39   | 2371.40   | 0.01 |
|         | 100                 | 160.35                   | 146.35   | 3317.70   | 0.01 |



**Table S 9** Return level of rainfall (mm.) and flood risk by regions for each return period (Cont.).

| Region   | Return Period(Year) | Rainfall by region (mm.) |          | $T_{and}$ | Risk |
|----------|---------------------|--------------------------|----------|-----------|------|
|          |                     | region 1                 | region 2 |           |      |
| ST1-ST10 | 2                   | 83.80                    | 97.30    | 3.59      | 1.00 |
|          | 5                   | 110.24                   | 114.32   | 10.88     | 0.95 |
|          | 10                  | 122.16                   | 127.02   | 20.83     | 0.79 |
|          | 25                  | 148.69                   | 193.00   | 157.16    | 0.19 |
|          | 50                  | 156.60                   | 196.15   | 210.99    | 0.14 |
|          | 100                 | 160.35                   | 198.73   | 250.47    | 0.12 |
| ST1-ST11 | 2                   | 83.80                    | 88.35    | 3.39      | 1.00 |
|          | 5                   | 110.24                   | 119.68   | 19.77     | 0.81 |
|          | 10                  | 122.16                   | 148.85   | 64.17     | 0.40 |
|          | 25                  | 148.69                   | 168.50   | 238.69    | 0.13 |
|          | 50                  | 156.60                   | 172.20   | 378.44    | 0.08 |
|          | 100                 | 160.35                   | 172.20   | 503.42    | 0.06 |
| ST1-ST12 | 2                   | 83.80                    | 108.80   | 3.50      | 1.00 |
|          | 5                   | 110.24                   | 130.66   | 14.32     | 0.90 |
|          | 10                  | 122.16                   | 146.42   | 39.33     | 0.56 |
|          | 25                  | 148.69                   | 158.70   | 139.97    | 0.21 |
|          | 50                  | 156.60                   | 165.29   | 243.27    | 0.12 |
|          | 100                 | 160.35                   | 169.19   | 336.96    | 0.09 |
| ST1-ST13 | 2                   | 83.80                    | 98.75    | 3.85      | 1.00 |
|          | 5                   | 110.24                   | 131.48   | 18.45     | 0.83 |
|          | 10                  | 122.16                   | 152.02   | 40.55     | 0.55 |
|          | 25                  | 148.69                   | 183.85   | 144.64    | 0.20 |
|          | 50                  | 156.60                   | 219.26   | 279.30    | 0.11 |
|          | 100                 | 160.35                   | 241.33   | 391.04    | 0.08 |
|          | 50                  | 156.60                   | 135.70   | 284.31    | 0.11 |
|          | 100                 | 160.35                   | 140.60   | 351.58    | 0.09 |
| ST1-ST15 | 2                   | 83.80                    | 66.40    | 3.42      | 1.00 |
|          | 5                   | 110.24                   | 80.74    | 13.27     | 0.92 |
|          | 10                  | 122.16                   | 88.00    | 30.16     | 0.66 |
|          | 25                  | 148.69                   | 94.62    | 111.62    | 0.25 |
|          | 50                  | 156.60                   | 97.39    | 189.11    | 0.16 |
|          | 100                 | 160.35                   | 98.19    | 232.37    | 0.13 |
| ST1-ST16 | 2                   | 83.80                    | 62.75    | 3.27      | 1.00 |
|          | 5                   | 110.24                   | 81.04    | 17.28     | 0.85 |
|          | 10                  | 122.16                   | 97.93    | 57.43     | 0.43 |
|          | 25                  | 148.69                   | 105.79   | 182.94    | 0.16 |
|          | 50                  | 156.60                   | 109.57   | 271.64    | 0.11 |
|          | 100                 | 160.35                   | 110.94   | 322.17    | 0.10 |
| ST2-ST3  | 2                   | 74.95                    | 84.20    | 3.66      | 1.00 |
|          | 5                   | 104.28                   | 111.68   | 15.82     | 0.88 |
|          | 10                  | 121.27                   | 126.36   | 30.73     | 0.65 |
|          | 25                  | 160.64                   | 179.90   | 115.32    | 0.24 |
|          | 50                  | 164.21                   | 223.72   | 160.53    | 0.18 |
|          | 100                 | 164.31                   | 249.11   | 184.00    | 0.16 |

**Table S 10** Return level of rainfall (mm.) and flood risk by regions for each return period (Cont.).

| Region   | RP(Year) | Rainfall by region (mm.) |          | $T_{and}$ | Risk |
|----------|----------|--------------------------|----------|-----------|------|
|          |          | region 1                 | region 2 |           |      |
| ST2-ST4  | 2        | 74.95                    | 75.15    | 4.21      | 1.00 |
|          | 5        | 104.28                   | 97.98    | 26.78     | 0.70 |
|          | 10       | 121.27                   | 119.55   | 85.09     | 0.32 |
|          | 25       | 160.64                   | 132.60   | 315.62    | 0.10 |
|          | 50       | 164.21                   | 157.86   | 589.38    | 0.05 |
|          | 100      | 164.31                   | 177.08   | 841.35    | 0.04 |
| ST2-ST5  | 2        | 74.95                    | 84.80    | 4.15      | 1.00 |
|          | 5        | 104.28                   | 109.68   | 23.73     | 0.75 |
|          | 10       | 121.27                   | 134.73   | 86.41     | 0.31 |
|          | 25       | 160.64                   | 152.38   | 383.03    | 0.08 |
|          | 50       | 164.21                   | 172.19   | 739.20    | 0.04 |
|          | 100      | 164.31                   | 186.30   | 1108.60   | 0.03 |
| ST2-ST6  | 2        | 74.95                    | 90.90    | 3.48      | 1.00 |
|          | 5        | 104.28                   | 117.42   | 34.64     | 0.61 |
|          | 10       | 121.27                   | 120.93   | 69.67     | 0.37 |
|          | 25       | 160.64                   | 141.10   | 537.63    | 0.06 |
|          | 50       | 164.21                   | 147.90   | 826.27    | 0.04 |
|          | 100      | 164.31                   | 153.45   | 1100.12   | 0.03 |
| ST2-ST7  | 2        | 74.95                    | 83.60    | 2.94      | 1.00 |
|          | 5        | 104.28                   | 122.00   | 14.78     | 0.89 |
|          | 10       | 121.27                   | 132.10   | 24.55     | 0.74 |
|          | 25       | 160.64                   | 170.76   | 89.54     | 0.30 |
|          | 50       | 164.21                   | 182.83   | 119.95    | 0.24 |
|          | 100      | 164.31                   | 183.27   | 121.18    | 0.23 |
| ST2-ST8  | 2        | 74.95                    | 74.70    | 3.36      | 1.00 |
|          | 5        | 104.28                   | 94.38    | 15.16     | 0.89 |
|          | 10       | 121.27                   | 118.63   | 53.70     | 0.45 |
|          | 25       | 160.64                   | 139.89   | 217.89    | 0.14 |
|          | 50       | 164.21                   | 144.39   | 269.21    | 0.11 |
|          | 100      | 164.31                   | 146.35   | 290.73    | 0.10 |
| ST2-ST10 | 2        | 74.95                    | 97.30    | 3.77      | 1.00 |
|          | 5        | 104.28                   | 114.32   | 12.58     | 0.93 |
|          | 10       | 121.27                   | 127.02   | 23.73     | 0.75 |
|          | 25       | 160.64                   | 193.00   | 86.95     | 0.31 |
|          | 50       | 164.21                   | 196.15   | 93.74     | 0.29 |
|          | 100      | 164.31                   | 198.73   | 97.19     | 0.28 |

**Table S 11** Return level of rainfall (mm.) and flood risk by regions for each return period (Cont.).

| Region   | RP(Year) | Rainfall by region (mm.) |          | $T_{and}$ | Risk |
|----------|----------|--------------------------|----------|-----------|------|
|          |          | region 1                 | region 2 |           |      |
| ST2-ST11 | 2        | 74.95                    | 88.35    | 3.02      | 1.00 |
|          | 5        | 104.28                   | 119.68   | 12.11     | 0.94 |
|          | 10       | 121.27                   | 148.85   | 28.28     | 0.68 |
|          | 25       | 160.64                   | 168.50   | 62.51     | 0.40 |
|          | 50       | 164.21                   | 172.20   | 68.26     | 0.38 |
|          | 100      | 164.31                   | 172.20   | 68.36     | 0.38 |
| ST2-ST12 | 2        | 74.95                    | 108.80   | 3.18      | 1.00 |
|          | 5        | 104.28                   | 130.66   | 11.17     | 0.95 |
|          | 10       | 121.27                   | 146.42   | 25.31     | 0.73 |
|          | 25       | 160.64                   | 158.70   | 64.10     | 0.40 |
|          | 50       | 164.21                   | 165.29   | 89.61     | 0.30 |
|          | 100      | 164.31                   | 169.19   | 109.98    | 0.25 |
| ST2-ST13 | 2        | 74.95                    | 98.75    | 4.02      | 1.00 |
|          | 5        | 104.28                   | 131.48   | 23.18     | 0.76 |
|          | 10       | 121.27                   | 152.02   | 54.20     | 0.45 |
|          | 25       | 160.64                   | 183.85   | 190.51    | 0.16 |
|          | 50       | 164.21                   | 219.26   | 303.22    | 0.10 |
|          | 100      | 164.31                   | 241.33   | 377.45    | 0.08 |
| ST2-ST14 | 2        | 74.95                    | 67.45    | 3.88      | 1.00 |
|          | 5        | 104.28                   | 98.98    | 37.47     | 0.58 |
|          | 10       | 121.27                   | 115.10   | 105.25    | 0.26 |
|          | 25       | 160.64                   | 127.68   | 400.22    | 0.08 |
|          | 50       | 164.21                   | 135.70   | 532.01    | 0.06 |
|          | 100      | 164.31                   | 140.60   | 601.27    | 0.05 |
| ST2-ST15 | 2        | 74.95                    | 66.40    | 3.22      | 1.00 |
|          | 5        | 104.28                   | 80.74    | 12.11     | 0.94 |
|          | 10       | 121.27                   | 88.00    | 25.91     | 0.72 |
|          | 25       | 160.64                   | 94.62    | 79.43     | 0.33 |
|          | 50       | 164.21                   | 97.39    | 116.27    | 0.24 |
|          | 100      | 164.31                   | 98.19    | 132.27    | 0.22 |
| ST2-ST16 | 2        | 74.95                    | 62.75    | 3.11      | 1.00 |
|          | 5        | 104.28                   | 81.04    | 14.52     | 0.90 |
|          | 10       | 121.27                   | 97.93    | 39.94     | 0.56 |
|          | 25       | 160.64                   | 105.79   | 90.96     | 0.30 |
|          | 50       | 164.21                   | 109.57   | 107.74    | 0.26 |
|          | 100      | 164.31                   | 110.94   | 113.00    | 0.25 |
| ST3-ST4  | 2        | 84.20                    | 75.15    | 3.33      | 1.00 |
|          | 5        | 111.68                   | 97.98    | 9.06      | 0.98 |
|          | 10       | 126.36                   | 119.55   | 15.18     | 0.89 |
|          | 25       | 179.90                   | 132.60   | 35.78     | 0.60 |
|          | 50       | 223.72                   | 157.86   | 66.67     | 0.38 |
|          | 100      | 249.11                   | 177.08   | 91.54     | 0.30 |

**Table S 12** Return level of rainfall (mm.) and flood risk by regions for each return period (Cont.).

| Region   | RP(Year) | Rainfall by region (mm.) |          | $T_{and}$ | Risk |
|----------|----------|--------------------------|----------|-----------|------|
|          |          | region 1                 | region 2 |           |      |
| ST3-ST5  | 2        | 84.20                    | 84.80    | 3.44      | 1.00 |
|          | 5        | 111.68                   | 109.68   | 9.44      | 0.97 |
|          | 10       | 126.36                   | 134.73   | 17.40     | 0.85 |
|          | 25       | 179.90                   | 152.38   | 48.40     | 0.49 |
|          | 50       | 223.72                   | 172.19   | 97.78     | 0.28 |
|          | 100      | 249.11                   | 186.30   | 140.93    | 0.20 |
| ST3-ST5  | 2        | 74.95                    | 97.30    | 3.77      | 1.00 |
|          | 5        | 104.28                   | 114.32   | 12.58     | 0.93 |
|          | 10       | 121.27                   | 127.02   | 23.73     | 0.75 |
|          | 25       | 160.64                   | 193.00   | 86.95     | 0.31 |
|          | 50       | 164.21                   | 196.15   | 93.74     | 0.29 |
|          | 100      | 164.31                   | 198.73   | 97.19     | 0.28 |
| ST3-ST6  | 2        | 74.95                    | 88.35    | 3.02      | 1.00 |
|          | 5        | 104.28                   | 119.68   | 12.11     | 0.94 |
|          | 10       | 121.27                   | 148.85   | 28.28     | 0.68 |
|          | 25       | 160.64                   | 168.50   | 62.51     | 0.40 |
|          | 50       | 164.21                   | 172.20   | 68.26     | 0.38 |
|          | 100      | 164.31                   | 172.20   | 68.36     | 0.38 |
| ST3-ST7  | 2        | 74.95                    | 108.80   | 3.18      | 1.00 |
|          | 5        | 104.28                   | 130.66   | 11.17     | 0.95 |
|          | 10       | 121.27                   | 146.42   | 25.31     | 0.73 |
|          | 25       | 160.64                   | 158.70   | 64.10     | 0.40 |
|          | 50       | 164.21                   | 165.29   | 89.61     | 0.30 |
|          | 100      | 164.31                   | 169.19   | 109.98    | 0.25 |
| ST3-ST8  | 2        | 74.95                    | 98.75    | 4.02      | 1.00 |
|          | 5        | 104.28                   | 131.48   | 23.18     | 0.76 |
|          | 10       | 121.27                   | 152.02   | 54.20     | 0.45 |
|          | 25       | 160.64                   | 183.85   | 190.51    | 0.16 |
|          | 50       | 164.21                   | 219.26   | 303.22    | 0.10 |
|          | 100      | 164.31                   | 241.33   | 377.45    | 0.08 |
| ST3-ST10 | 2        | 74.95                    | 66.40    | 3.22      | 1.00 |
|          | 5        | 104.28                   | 80.74    | 12.11     | 0.94 |
|          | 10       | 121.27                   | 88.00    | 25.91     | 0.72 |
|          | 25       | 160.64                   | 94.62    | 79.43     | 0.33 |
|          | 50       | 164.21                   | 97.39    | 116.27    | 0.24 |
|          | 100      | 164.31                   | 98.19    | 132.27    | 0.22 |

**Table S 13** Return level of rainfall (mm.) and flood risk by regions for each return period (Cont.).

| Region   | RP(Year) | Rainfall by region (mm.) |          | $T_{and}$ | Risk |
|----------|----------|--------------------------|----------|-----------|------|
|          |          | region 1                 | region 2 |           |      |
| ST3-ST11 | 2        | 74.95                    | 62.75    | 3.11      | 1.00 |
|          | 5        | 104.28                   | 81.04    | 14.52     | 0.90 |
|          | 10       | 121.27                   | 97.93    | 39.94     | 0.56 |
|          | 25       | 160.64                   | 105.79   | 90.96     | 0.30 |
|          | 50       | 164.21                   | 109.57   | 107.74    | 0.26 |
|          | 100      | 164.31                   | 110.94   | 113.00    | 0.25 |
| ST3-ST12 | 2        | 84.20                    | 75.15    | 3.33      | 1.00 |
|          | 5        | 111.68                   | 97.98    | 9.06      | 0.98 |
|          | 10       | 126.36                   | 119.55   | 15.18     | 0.89 |
|          | 25       | 179.90                   | 132.60   | 35.78     | 0.60 |
|          | 50       | 223.72                   | 157.86   | 66.67     | 0.38 |
|          | 100      | 249.11                   | 177.08   | 91.54     | 0.30 |
| ST3-ST13 | 2        | 84.20                    | 84.80    | 3.44      | 1.00 |
|          | 5        | 111.68                   | 109.68   | 9.44      | 0.97 |
|          | 10       | 126.36                   | 134.73   | 17.40     | 0.85 |
|          | 25       | 179.90                   | 152.38   | 48.40     | 0.49 |
|          | 50       | 223.72                   | 172.19   | 97.78     | 0.28 |
|          | 100      | 249.11                   | 186.30   | 140.93    | 0.20 |
| ST3-ST14 | 2        | 84.20                    | 67.45    | 3.29      | 1.00 |
|          | 5        | 111.68                   | 98.98    | 15.96     | 0.87 |
|          | 10       | 126.36                   | 115.10   | 30.38     | 0.66 |
|          | 25       | 179.90                   | 127.68   | 65.64     | 0.39 |
|          | 50       | 223.72                   | 135.70   | 106.82    | 0.26 |
|          | 100      | 249.11                   | 140.60   | 140.33    | 0.21 |
| ST3-ST15 | 2        | 84.20                    | 66.40    | 3.48      | 1.00 |
|          | 5        | 111.68                   | 80.74    | 13.02     | 0.92 |
|          | 10       | 126.36                   | 88.00    | 29.03     | 0.67 |
|          | 25       | 179.90                   | 94.62    | 139.72    | 0.21 |
|          | 50       | 223.72                   | 97.39    | 404.07    | 0.08 |
| ST3-ST16 | 2        | 84.20                    | 62.75    | 3.14      | 1.00 |
|          | 5        | 111.68                   | 81.04    | 11.82     | 0.94 |
|          | 10       | 126.36                   | 97.93    | 29.56     | 0.67 |
|          | 25       | 179.90                   | 105.79   | 75.89     | 0.35 |
|          | 50       | 223.72                   | 109.57   | 134.68    | 0.21 |
|          | 100      | 249.11                   | 110.94   | 178.64    | 0.16 |

**Table S 14** Return level of rainfall (mm.) and flood risk by regions for each return period (Cont.).

| Region   | RP(Year) | Rainfall by region (mm.) |          | $T_{and}$ | Risk |
|----------|----------|--------------------------|----------|-----------|------|
|          |          | region 1                 | region 2 |           |      |
| ST6-ST7  | 2        | 90.90                    | 83.60    | 2.65      | 1.00 |
|          | 5        | 117.42                   | 122.00   | 16.76     | 0.86 |
|          | 10       | 120.93                   | 132.10   | 22.72     | 0.76 |
|          | 25       | 141.10                   | 170.76   | 95.40     | 0.29 |
|          | 50       | 147.90                   | 182.83   | 153.01    | 0.19 |
|          | 100      | 153.45                   | 183.27   | 221.89    | 0.14 |
| ST6-ST8  | 2        | 90.90                    | 74.70    | 3.20      | 1.00 |
|          | 5        | 117.42                   | 94.38    | 23.76     | 0.75 |
|          | 10       | 120.93                   | 118.63   | 91.07     | 0.30 |
|          | 25       | 141.10                   | 139.89   | 870.14    | 0.04 |
|          | 50       | 147.90                   | 144.39   | 1625.38   | 0.02 |
|          | 100      | 153.45                   | 146.35   | 2435.33   | 0.01 |
| ST6-ST10 | 2        | 90.90                    | 97.30    | 3.82      | 1.00 |
|          | 5        | 117.42                   | 114.32   | 20.83     | 0.79 |
|          | 10       | 120.93                   | 127.02   | 35.27     | 0.60 |
|          | 25       | 141.10                   | 193.00   | 431.42    | 0.07 |
|          | 50       | 147.90                   | 196.15   | 587.36    | 0.05 |
|          | 100      | 153.45                   | 198.73   | 748.68    | 0.04 |
| ST6-ST11 | 2        | 90.90                    | 88.35    | 3.08      | 1.00 |
|          | 5        | 117.42                   | 119.68   | 18.84     | 0.83 |
|          | 10       | 120.93                   | 148.85   | 37.50     | 0.58 |
|          | 25       | 141.10                   | 168.50   | 94.03     | 0.29 |
|          | 50       | 147.90                   | 172.20   | 120.62    | 0.23 |
|          | 100      | 153.45                   | 172.20   | 142.45    | 0.20 |
| ST6-ST12 | 2        | 90.90                    | 108.80   | 3.00      | 1.00 |
|          | 5        | 117.42                   | 130.66   | 12.58     | 0.93 |
|          | 10       | 120.93                   | 146.42   | 21.93     | 0.78 |
|          | 25       | 141.10                   | 158.70   | 55.32     | 0.44 |
|          | 50       | 147.90                   | 165.29   | 81.13     | 0.33 |
|          | 100      | 153.45                   | 169.19   | 105.54    | 0.26 |
| ST6-ST13 | 2        | 90.90                    | 98.75    | 3.14      | 1.00 |
|          | 5        | 117.42                   | 131.48   | 14.36     | 0.90 |
|          | 10       | 120.93                   | 152.02   | 20.15     | 0.80 |
|          | 25       | 141.10                   | 183.85   | 52.91     | 0.46 |
|          | 50       | 147.90                   | 219.26   | 78.98     | 0.34 |
|          | 100      | 153.45                   | 241.33   | 103.21    | 0.27 |

**Table S 15** Return level of rainfall (mm.) and flood risk by regions for each return period (Cont.).

| Region   | RP(Year) | Rainfall by region (mm.) |          | $T_{and}$ | Risk |
|----------|----------|--------------------------|----------|-----------|------|
|          |          | region 1                 | region 2 |           |      |
| ST6-ST14 | 2        | 90.90                    | 67.45    | 3.47      | 1.00 |
|          | 5        | 117.42                   | 98.98    | 43.72     | 0.52 |
|          | 10       | 120.93                   | 115.10   | 88.40     | 0.31 |
|          | 25       | 141.10                   | 127.68   | 365.43    | 0.08 |
|          | 50       | 147.90                   | 135.70   | 640.04    | 0.05 |
|          | 100      | 153.45                   | 140.60   | 959.39    | 0.03 |
| ST6-ST15 | 2        | 90.90                    | 66.40    | 3.48      | 1.00 |
|          | 5        | 117.42                   | 80.74    | 29.07     | 0.67 |
|          | 10       | 120.93                   | 88.00    | 72.71     | 0.36 |
|          | 25       | 141.10                   | 94.62    | 604.89    | 0.05 |
|          | 50       | 147.90                   | 97.39    | 1668.58   | 0.02 |
|          | 100      | 153.45                   | 98.19    | 2810.27   | 0.01 |
| ST6-ST16 | 2        | 90.90                    | 62.75    | 3.04      | 1.00 |
|          | 5        | 117.42                   | 81.04    | 24.40     | 0.74 |
|          | 10       | 120.93                   | 97.93    | 67.76     | 0.38 |
|          | 25       | 141.10                   | 105.79   | 208.85    | 0.14 |
|          | 50       | 147.90                   | 109.57   | 308.90    | 0.10 |
|          | 100      | 153.45                   | 110.94   | 392.10    | 0.08 |

## References

- [1] S.G. Coles and J.A. Tawn, *Modelling extreme multivariate events*, Journal of the Royal Statistical Society: Series B (Methodological) 53 (1991), pp. 377–392.
- [2] S.G. Coles and J.A. Tawn, *Statistical methods for multivariate extremes: an application to structural design*, Journal of the Royal Statistical Society: Series C (Applied Statistics) 43 (1994), pp. 1–31.
- [3] J. Galambos, *Order statistics of samples from multivariate distributions*, J. Amer. Statist. Assoc. 70 (1975), pp. 674–680.
- [4] E.J. Gumbel, *Distributions des valeurs extremes en plusieurs dimensions*, Publ. Inst. Statist. Univ. Paris 9 (1960), pp. 171–173.
- [5] J. Husler and R.D. Reiss, *Maxima of normal random vectors: between independence and complete dependence*, Statist. Probab. Letters 7 (1989), pp. 283–286.
- [6] H. Joe, *Families of min-stable multivariate exponential and multivariate extreme value distributions*, Statist. Probab. Letters 9 (1990), pp. 75–81.
- [7] R.L. Smith, *Extreme value theory*, in *Handbook of Applicable Mathematics*, W. Ledermann, ed., Vol. 7, John Wiley, Chichester, 1990, pp. 437–471.
- [8] J.A. Tawn, *Bivariate extreme value theory: models and estimation*, Biometrika 75 (1988), pp. 397–415.
