# Supplementary material
Source: MDPI journal article supplement (https://www.mdpi.com/2073-4433/14/10/1525)

**Quantile curves**

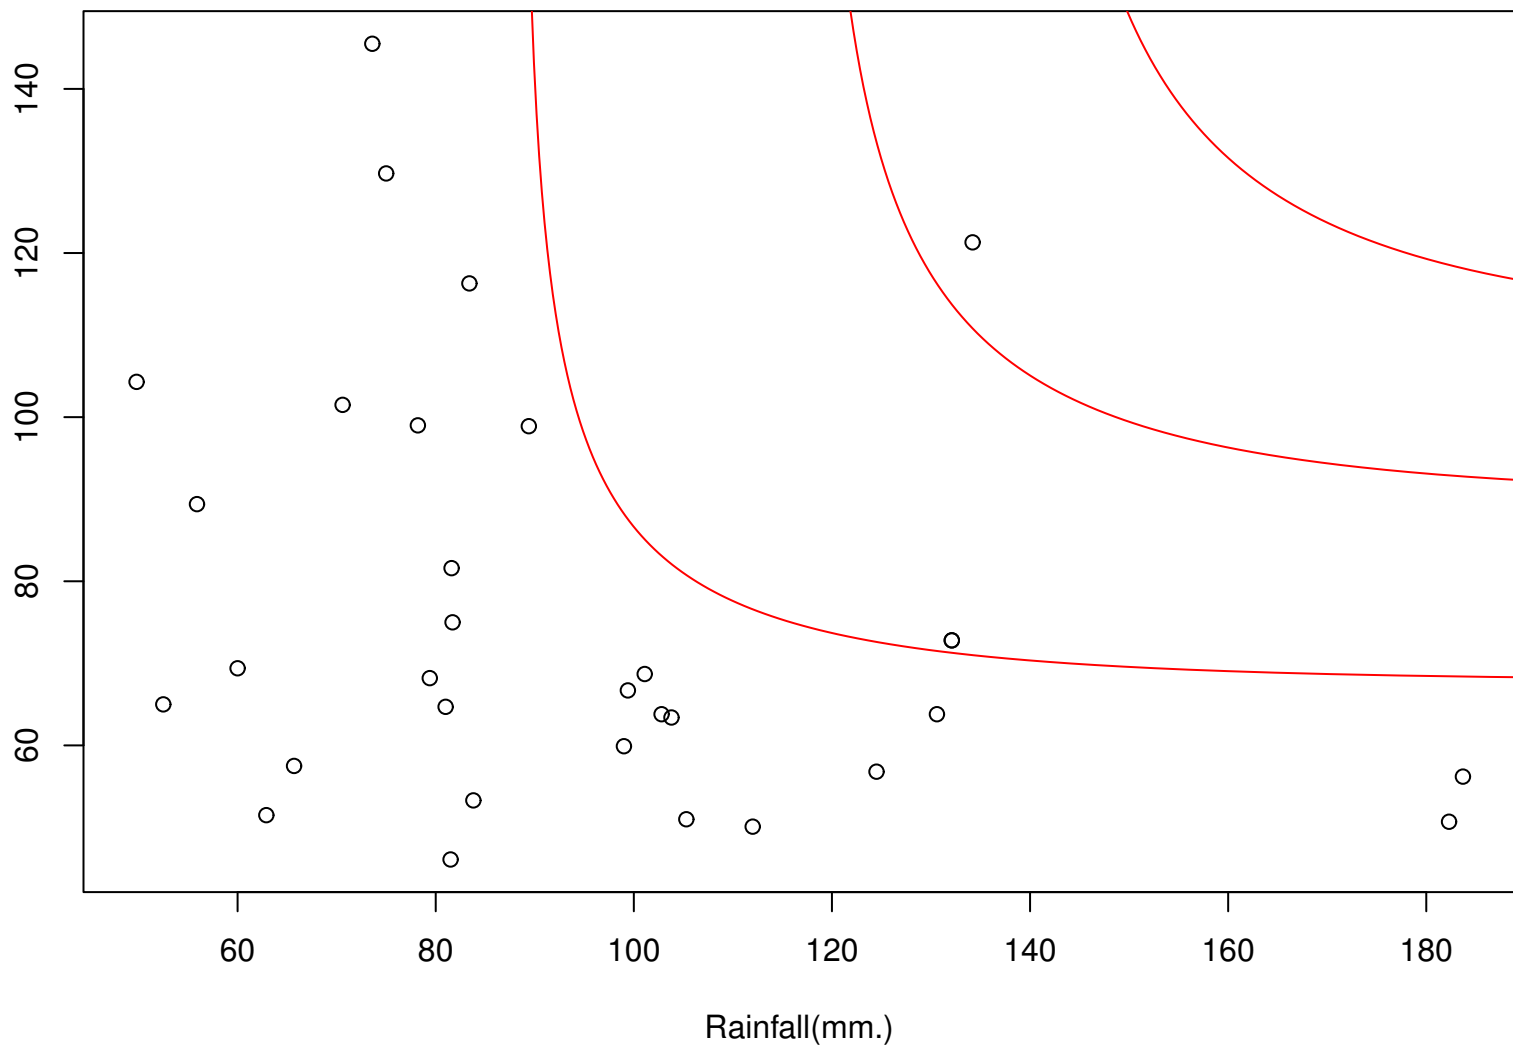

Supplement: s1 [file s1]

**Quantile curves**

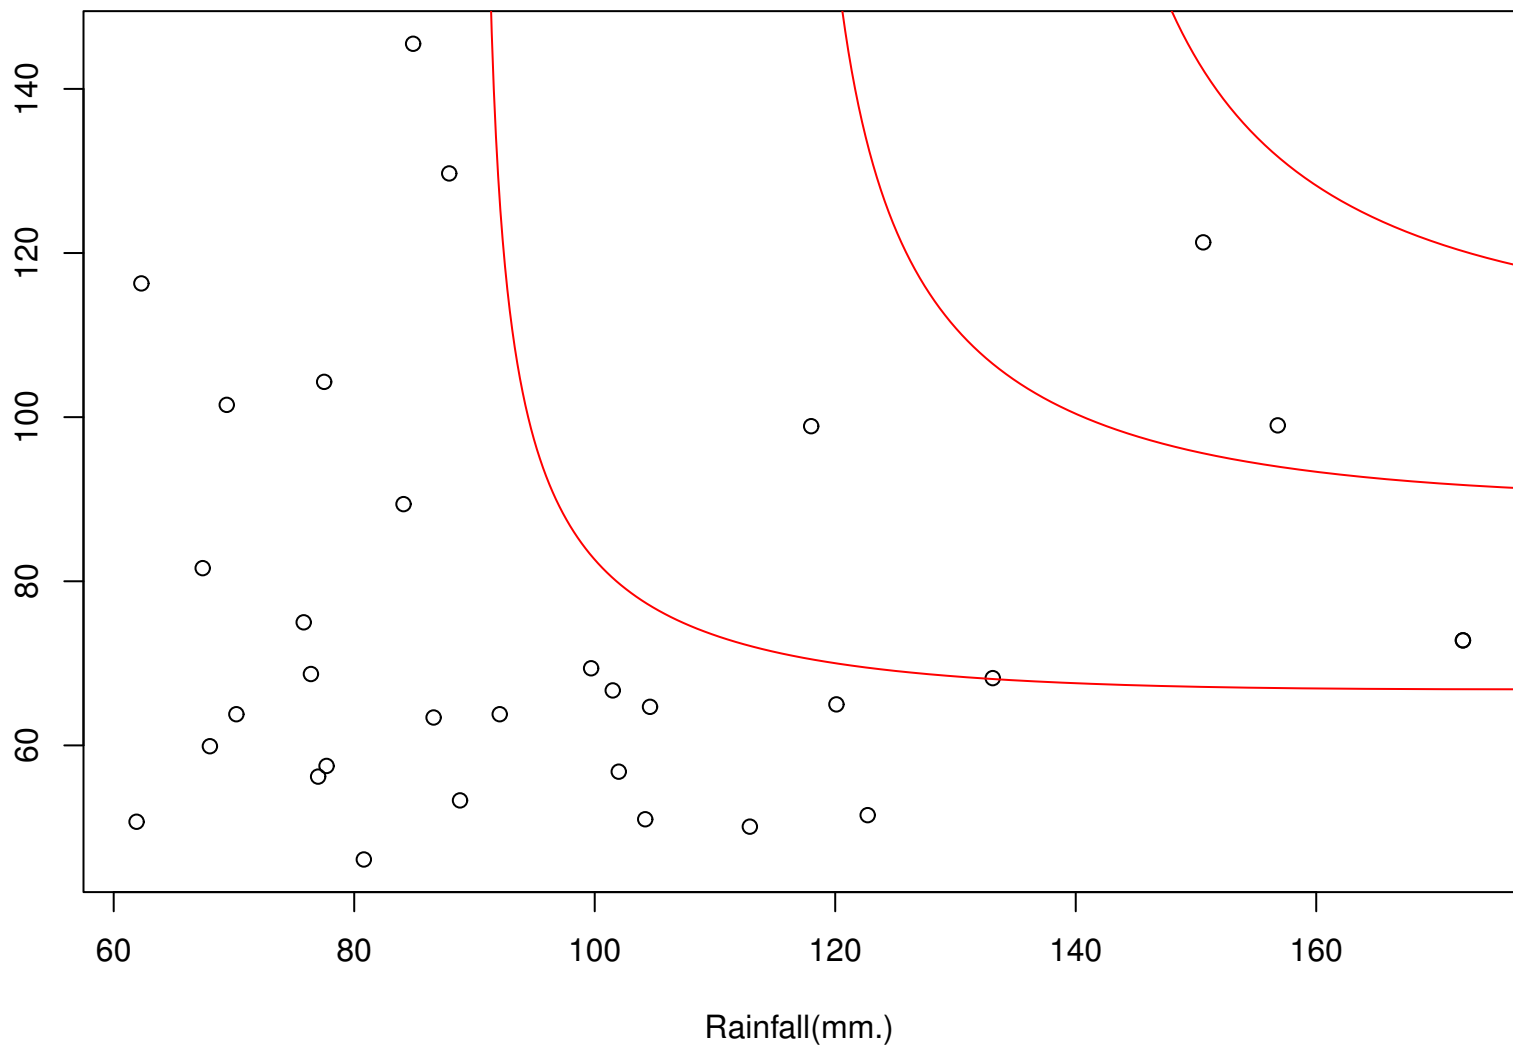

Supplement: s1 [file s1]

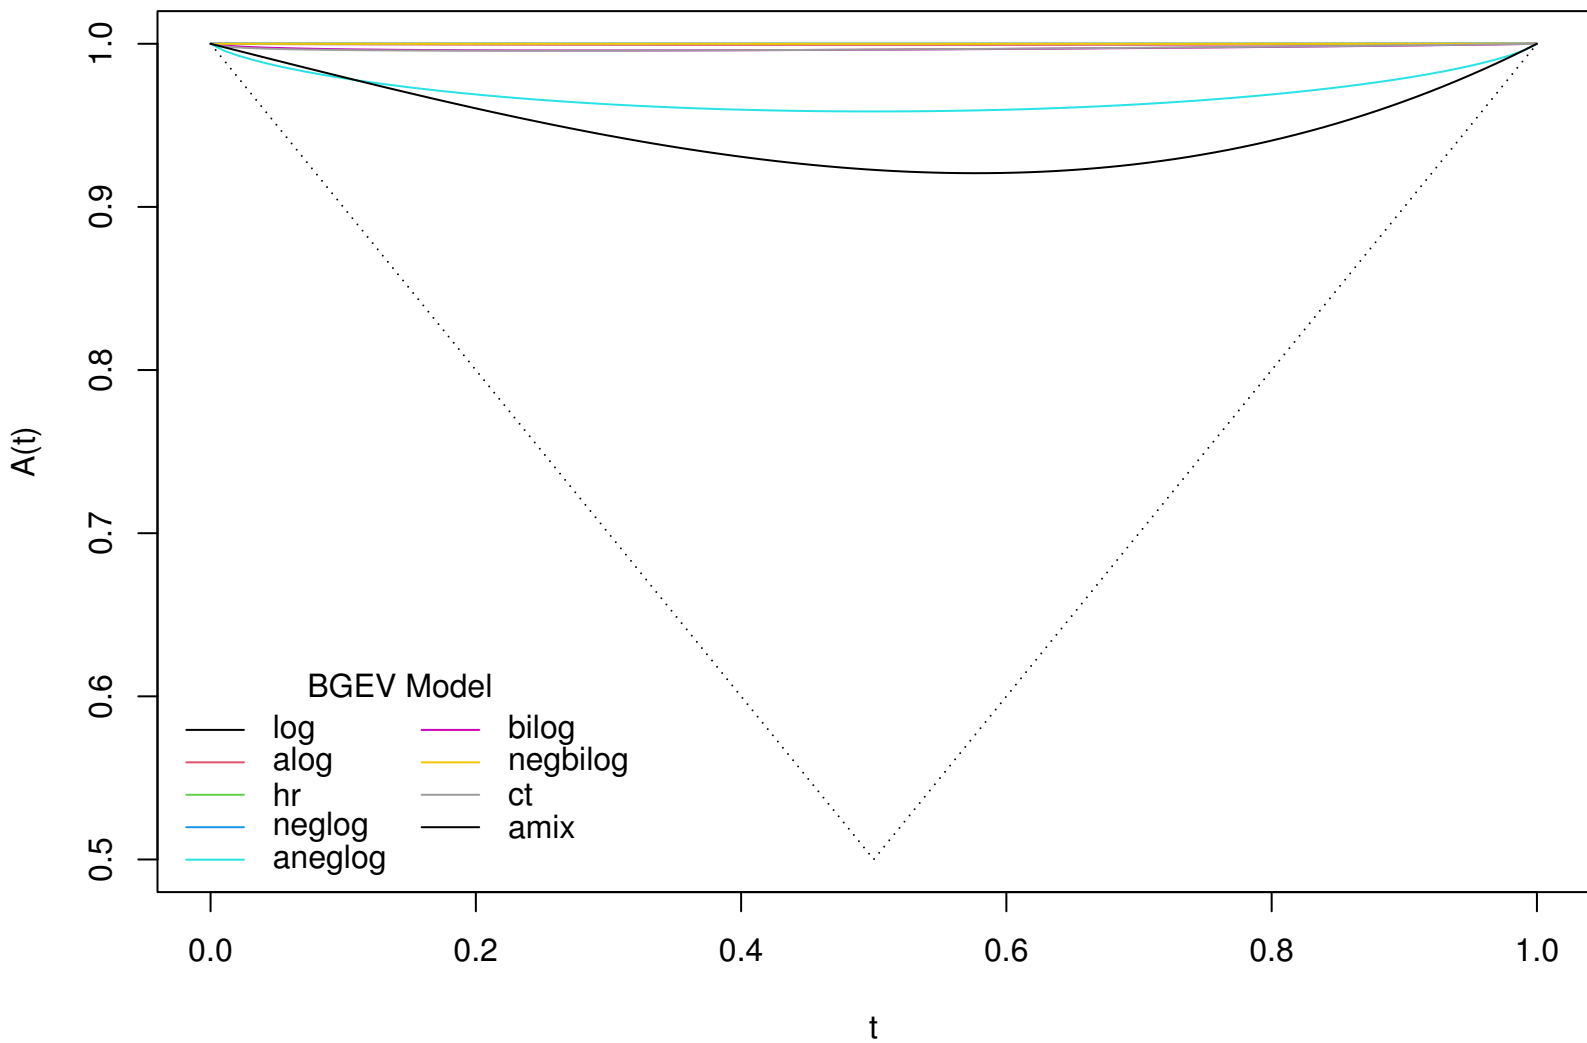

Supplement: s1 [file s1]

**Quantile curves**

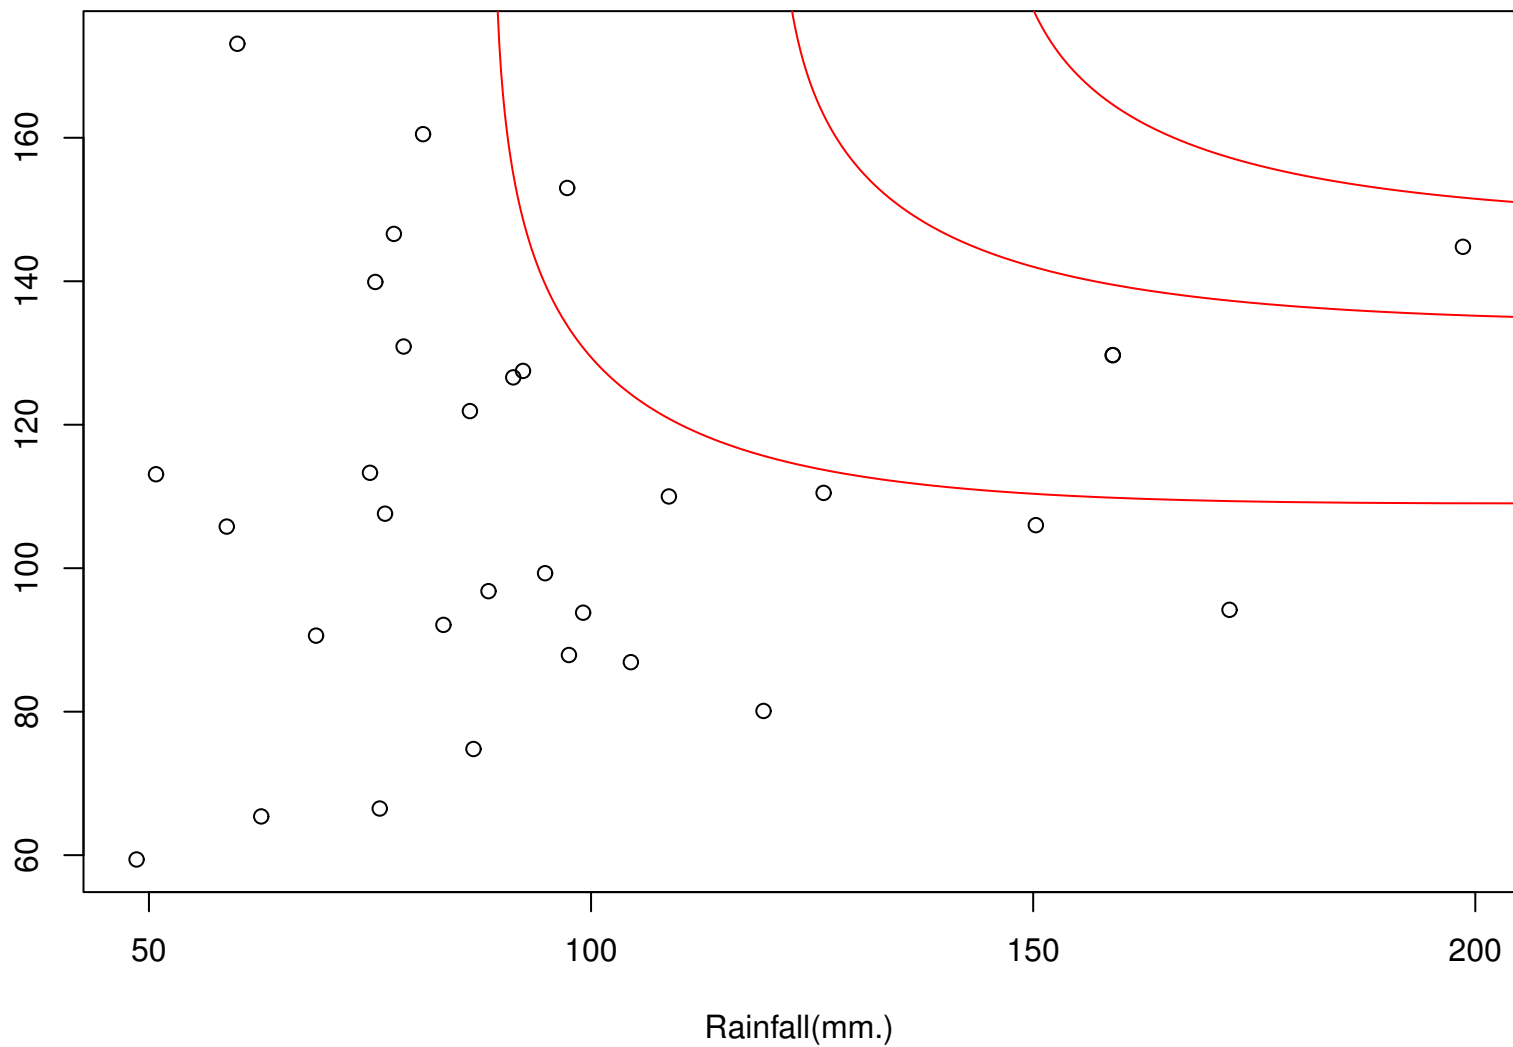

Supplement: s1 [file s1]

**Quantile curves**

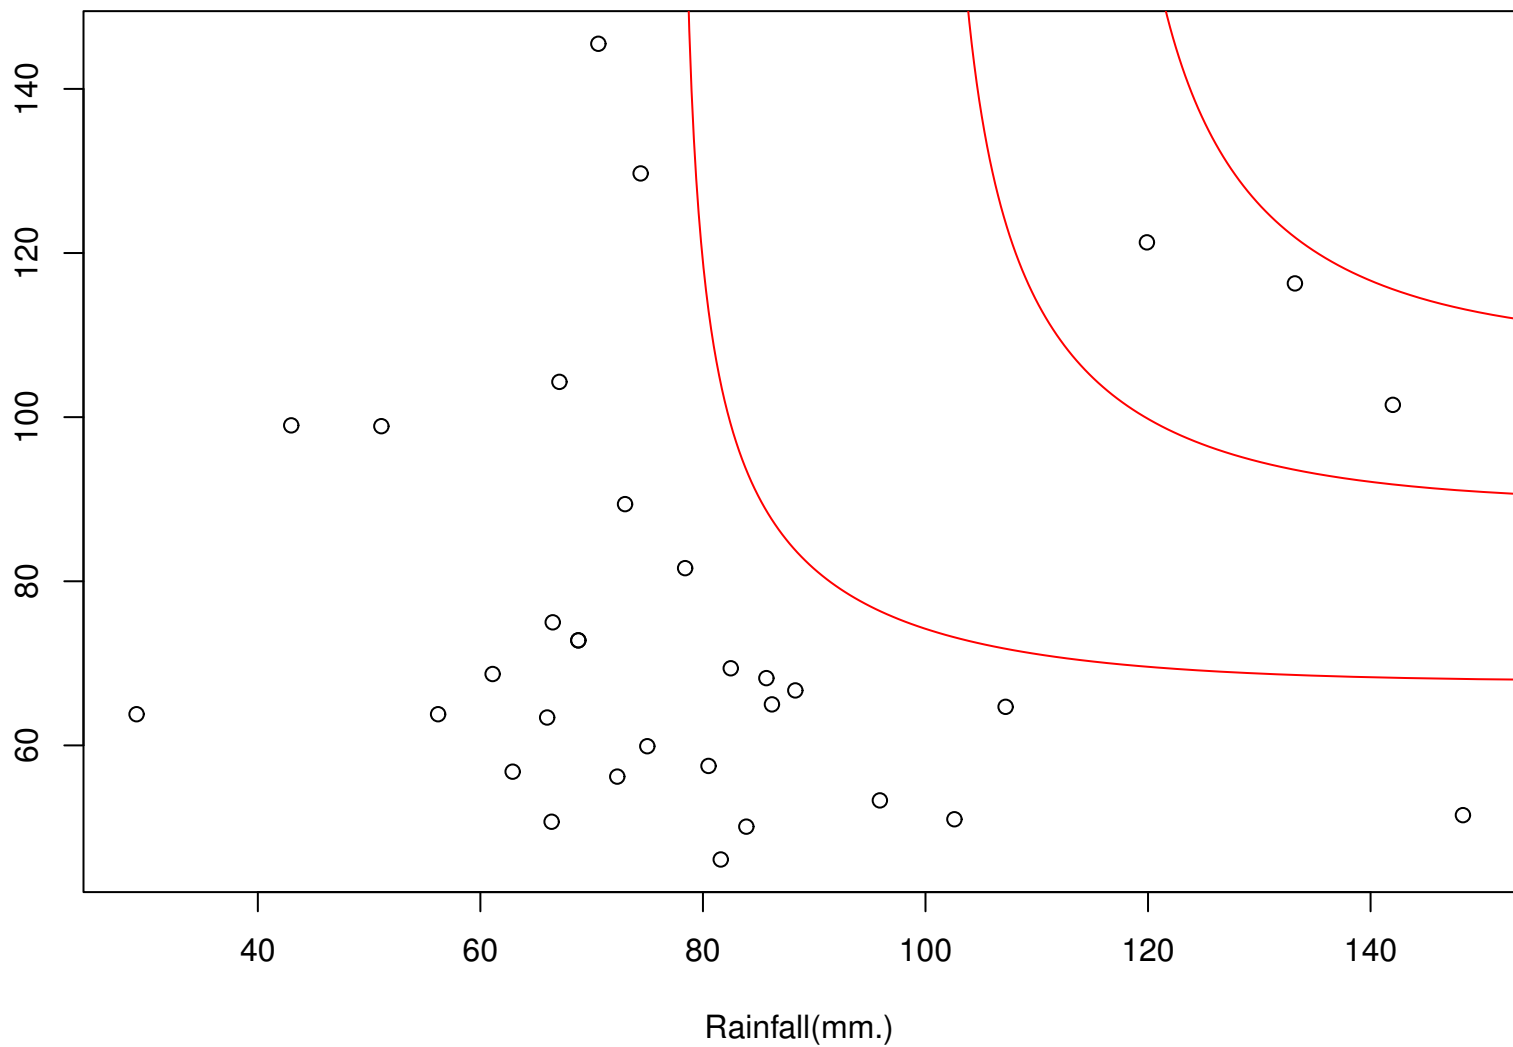

Supplement: s1 [file s1]

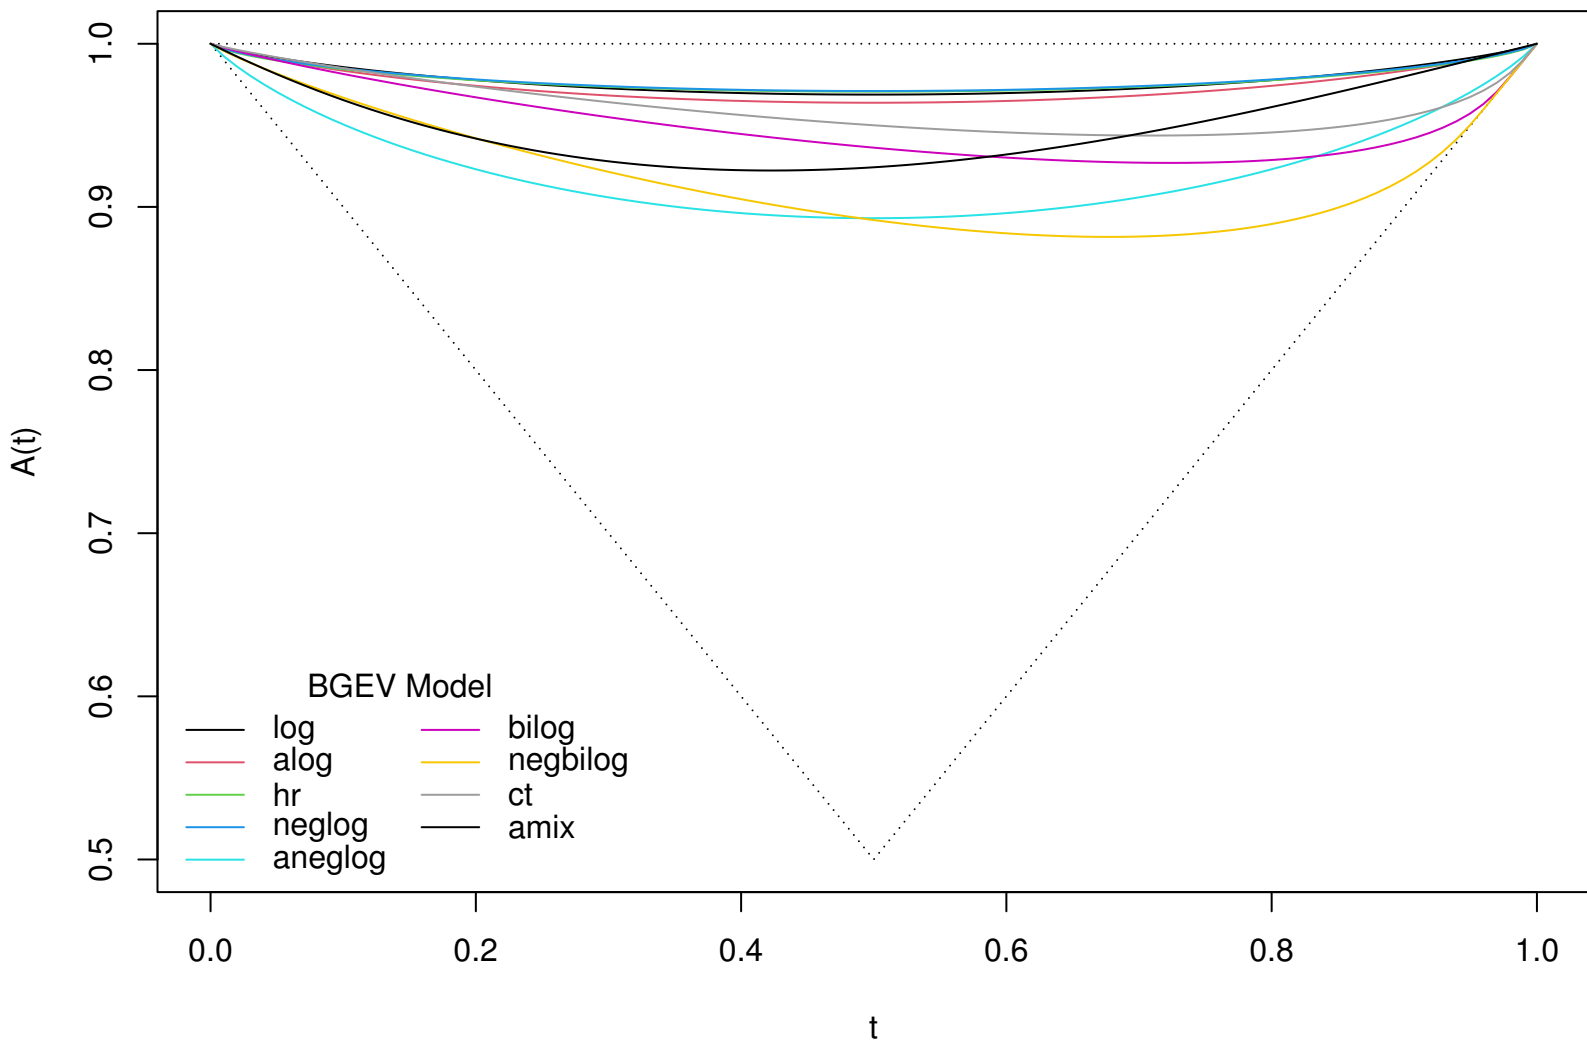

Supplement: s1 [file s1]

Quantile curves

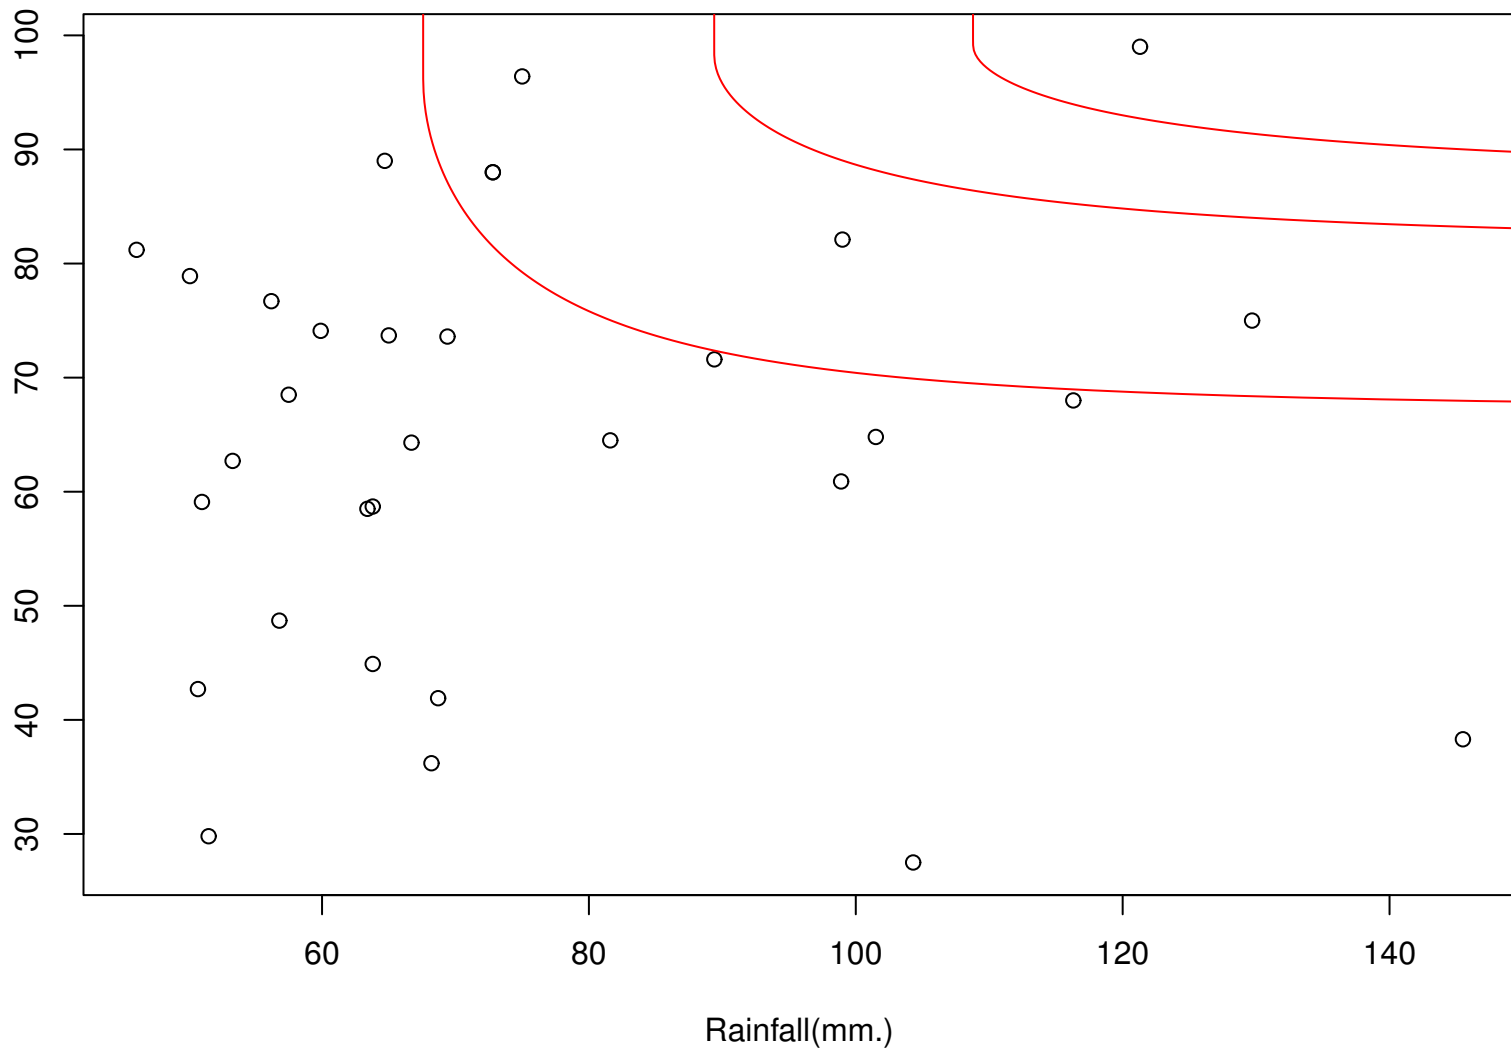

Supplement: s1 [file s1]

Quantile curves

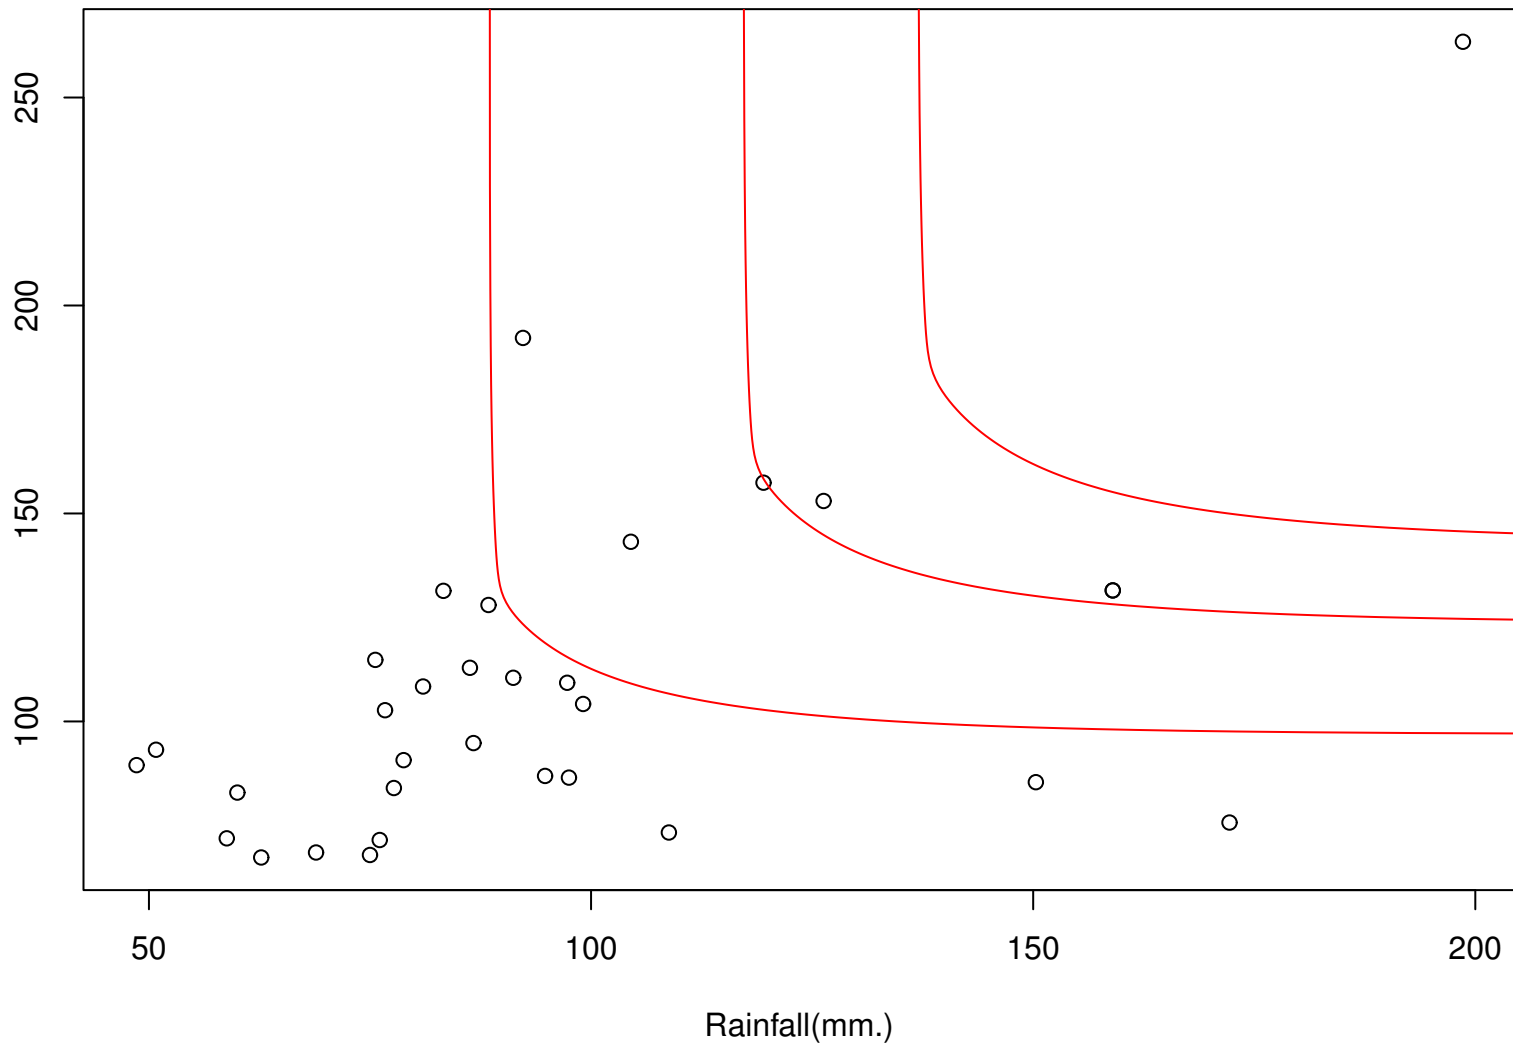

Supplement: s1 [file s1]

Quantile curves

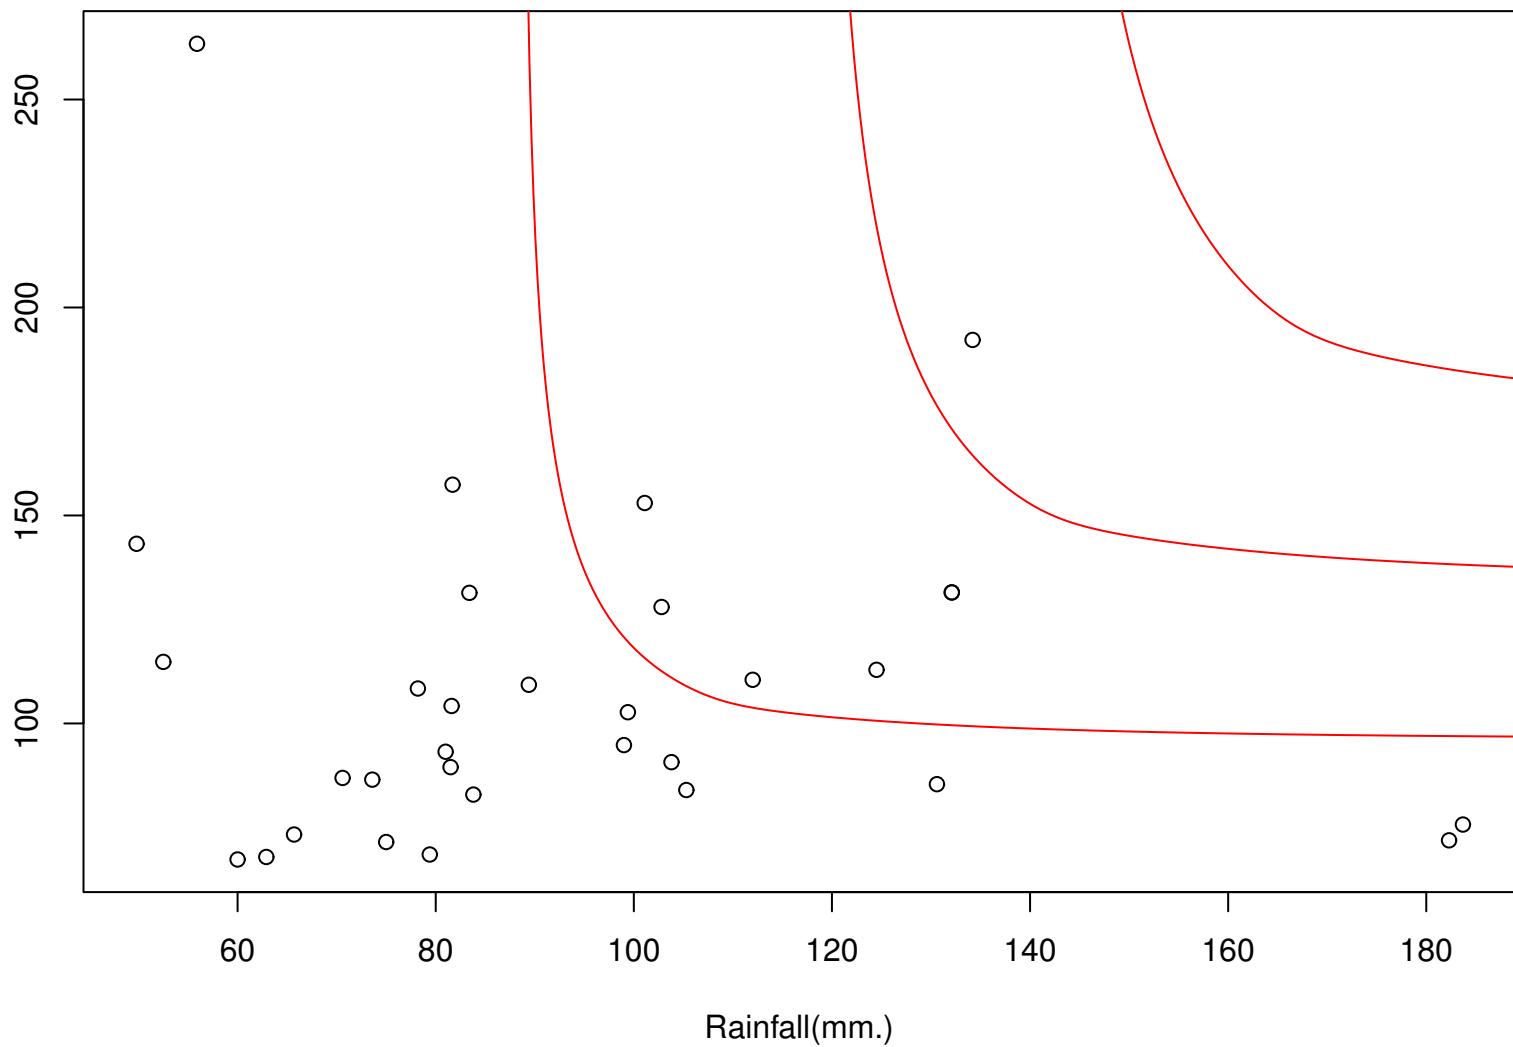

Supplement: s1 [file s1]

**Quantile curves**

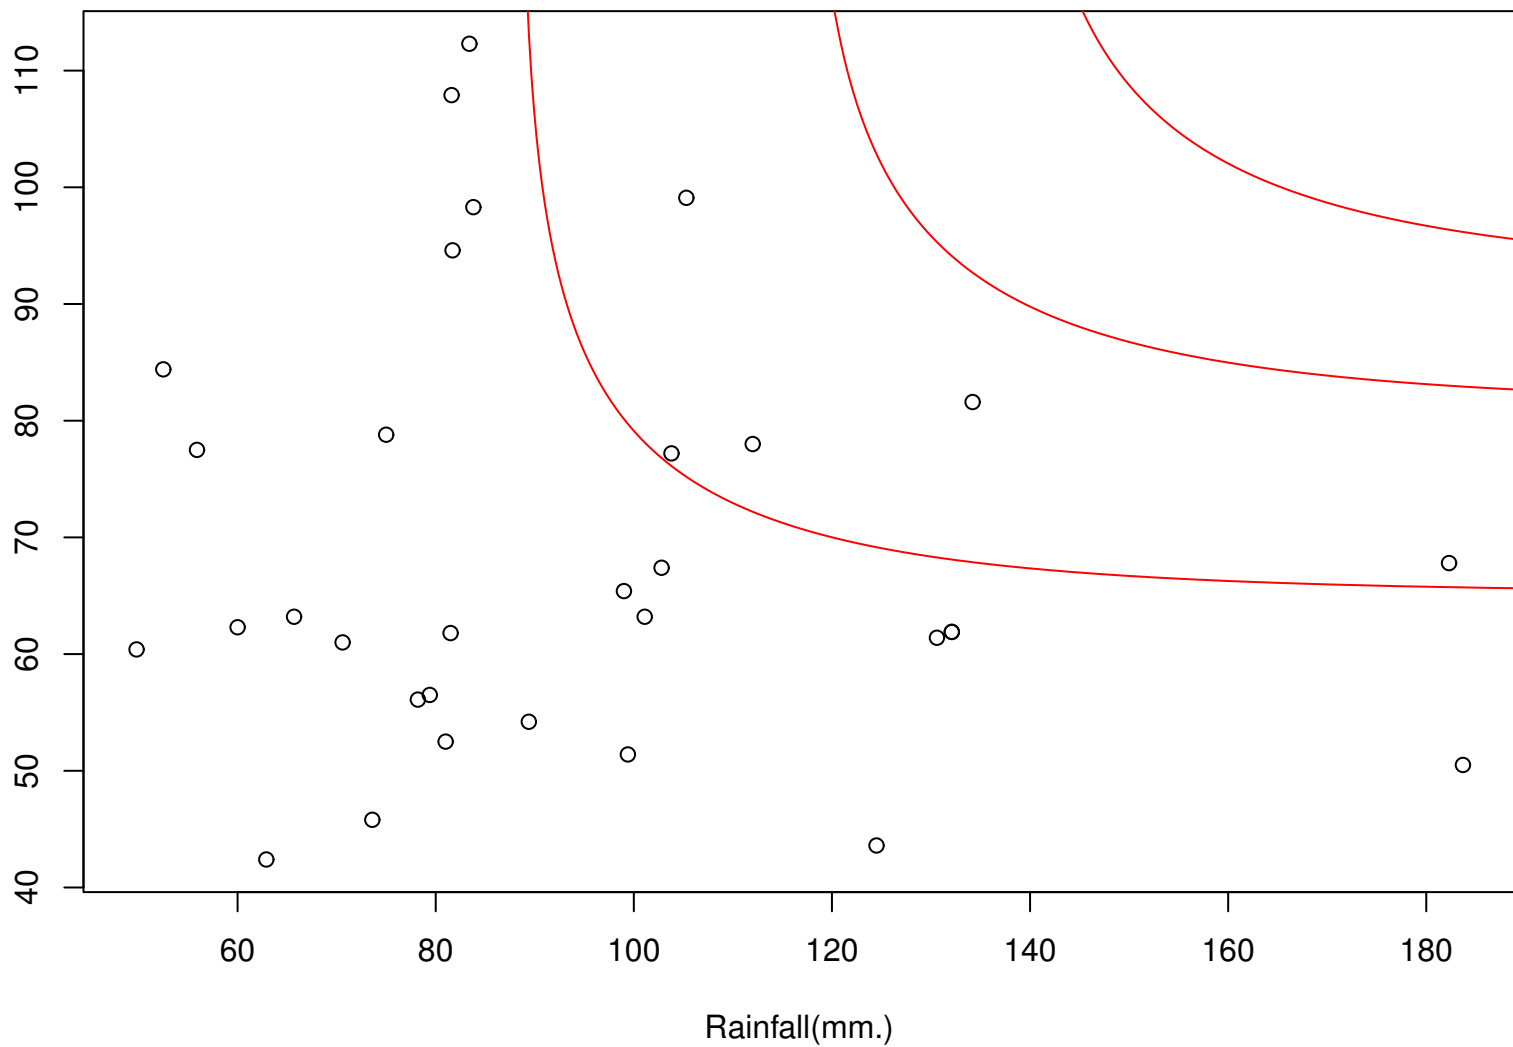

Supplement: s1 [file s1]

Quantile curves

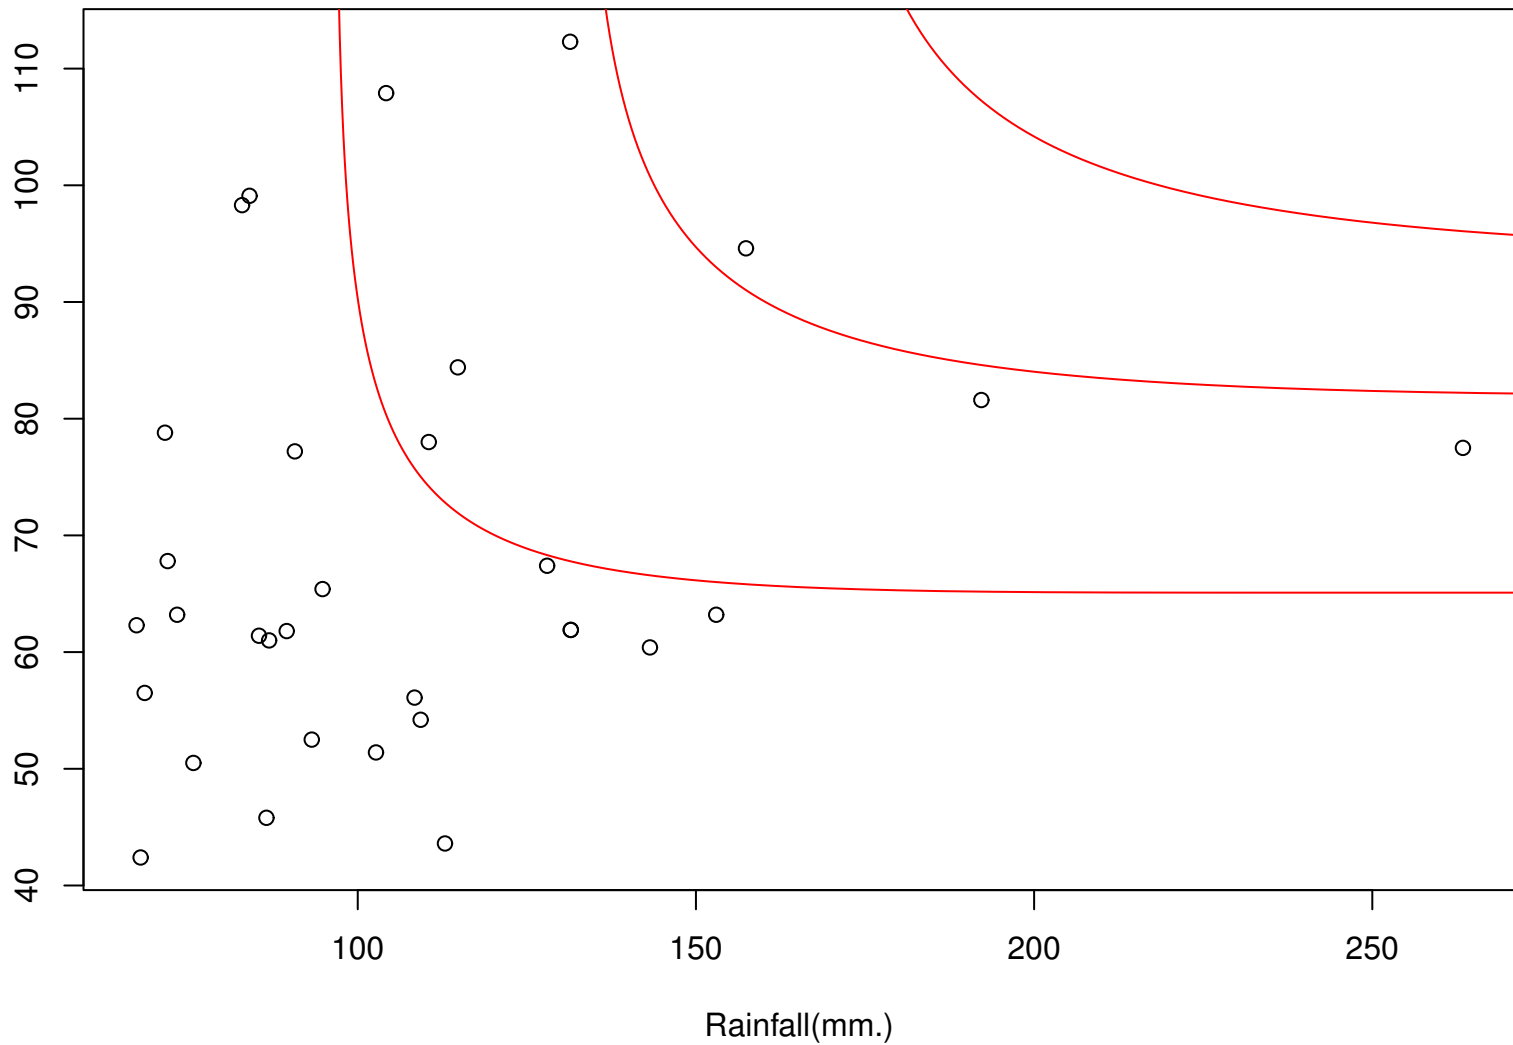

Supplement: s1 [file s1]

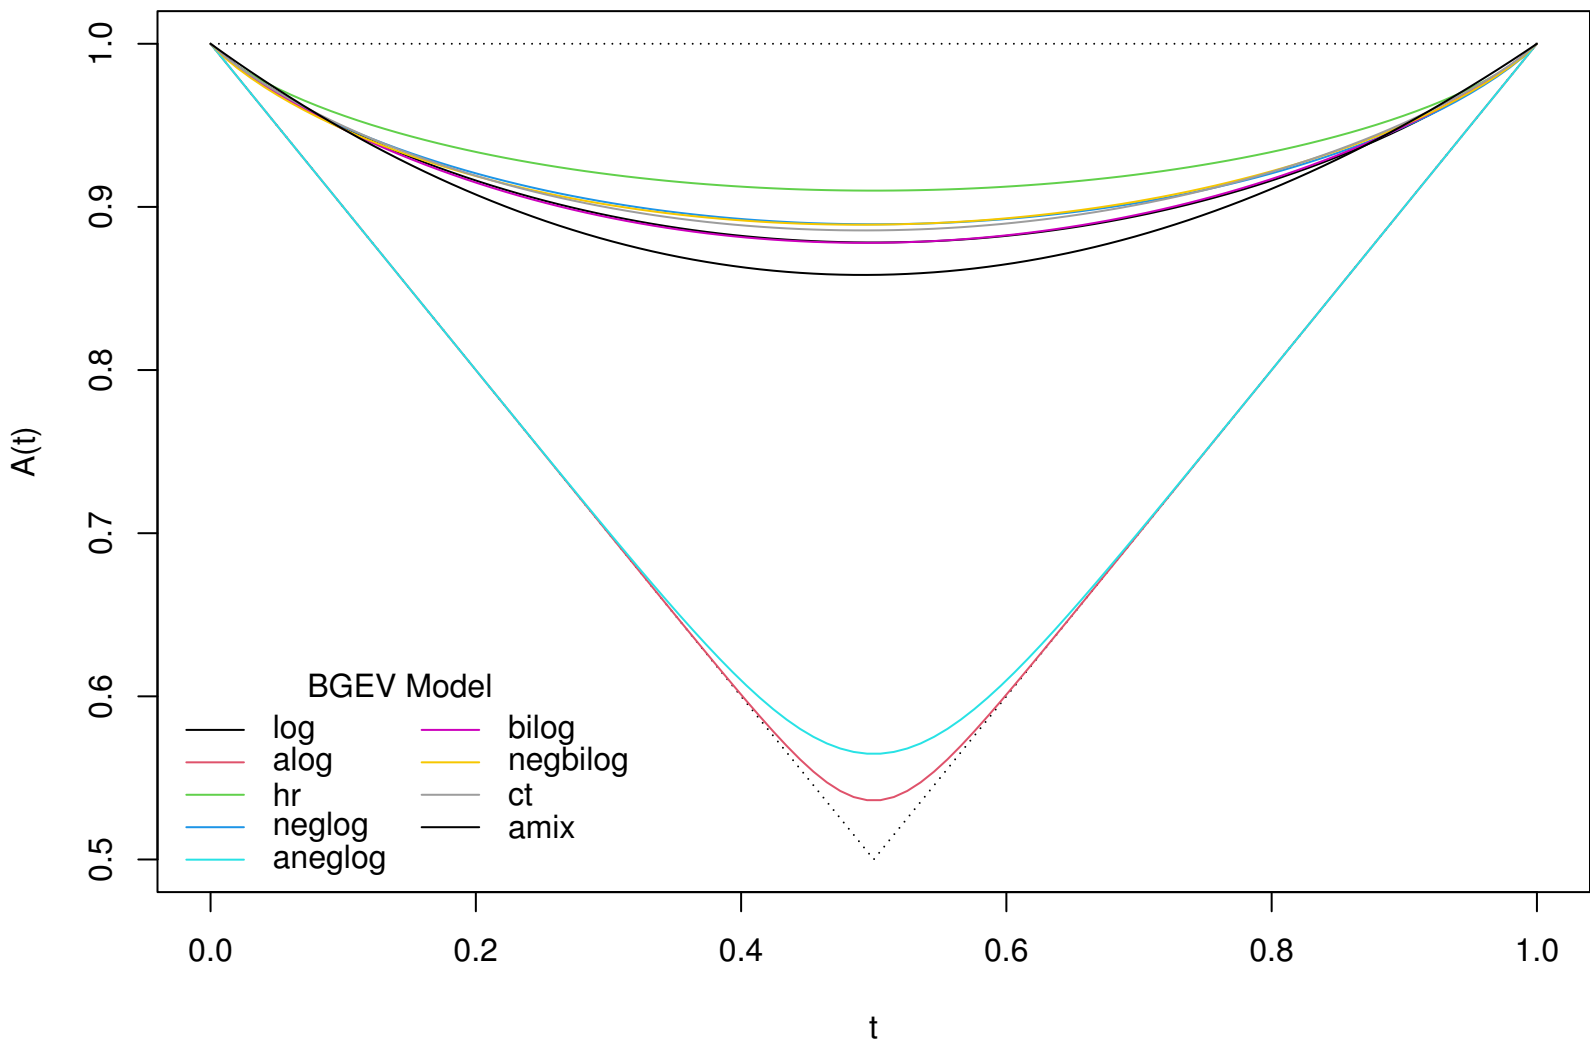

Supplement: s1 [file s1]

Quantile curves

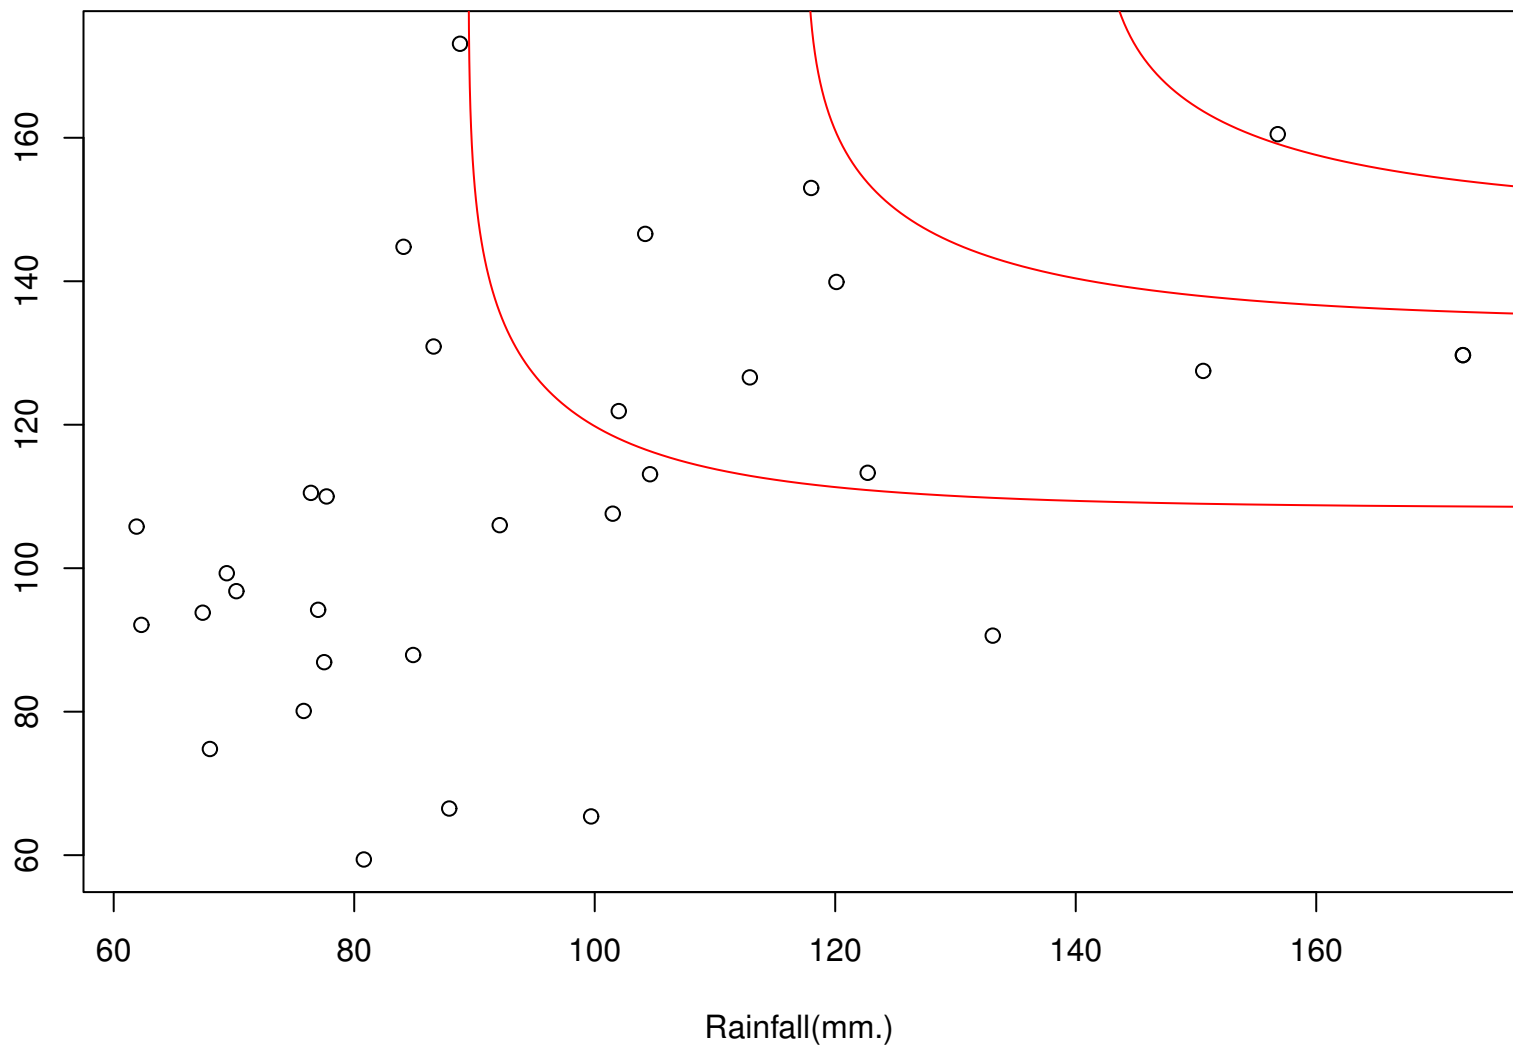

Supplement: s1 [file s1]

## Quantile curves



Supplement: s1 [file s1]

**Quantile curves**

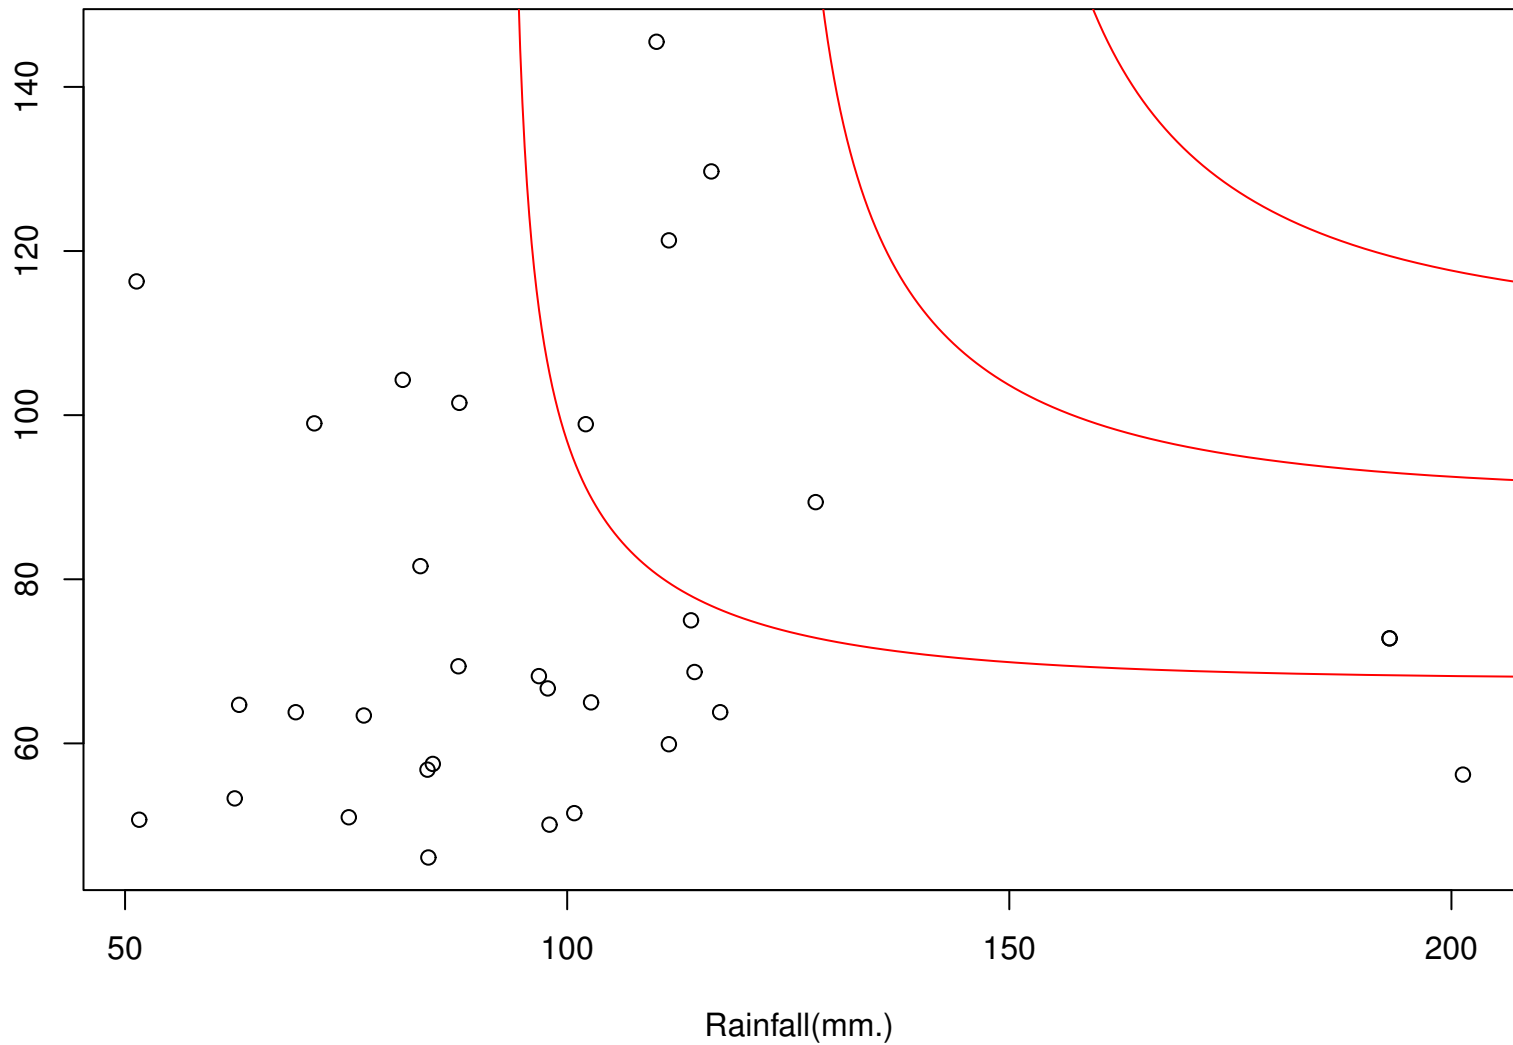

Supplement: s1 [file s1]

Quantile curves

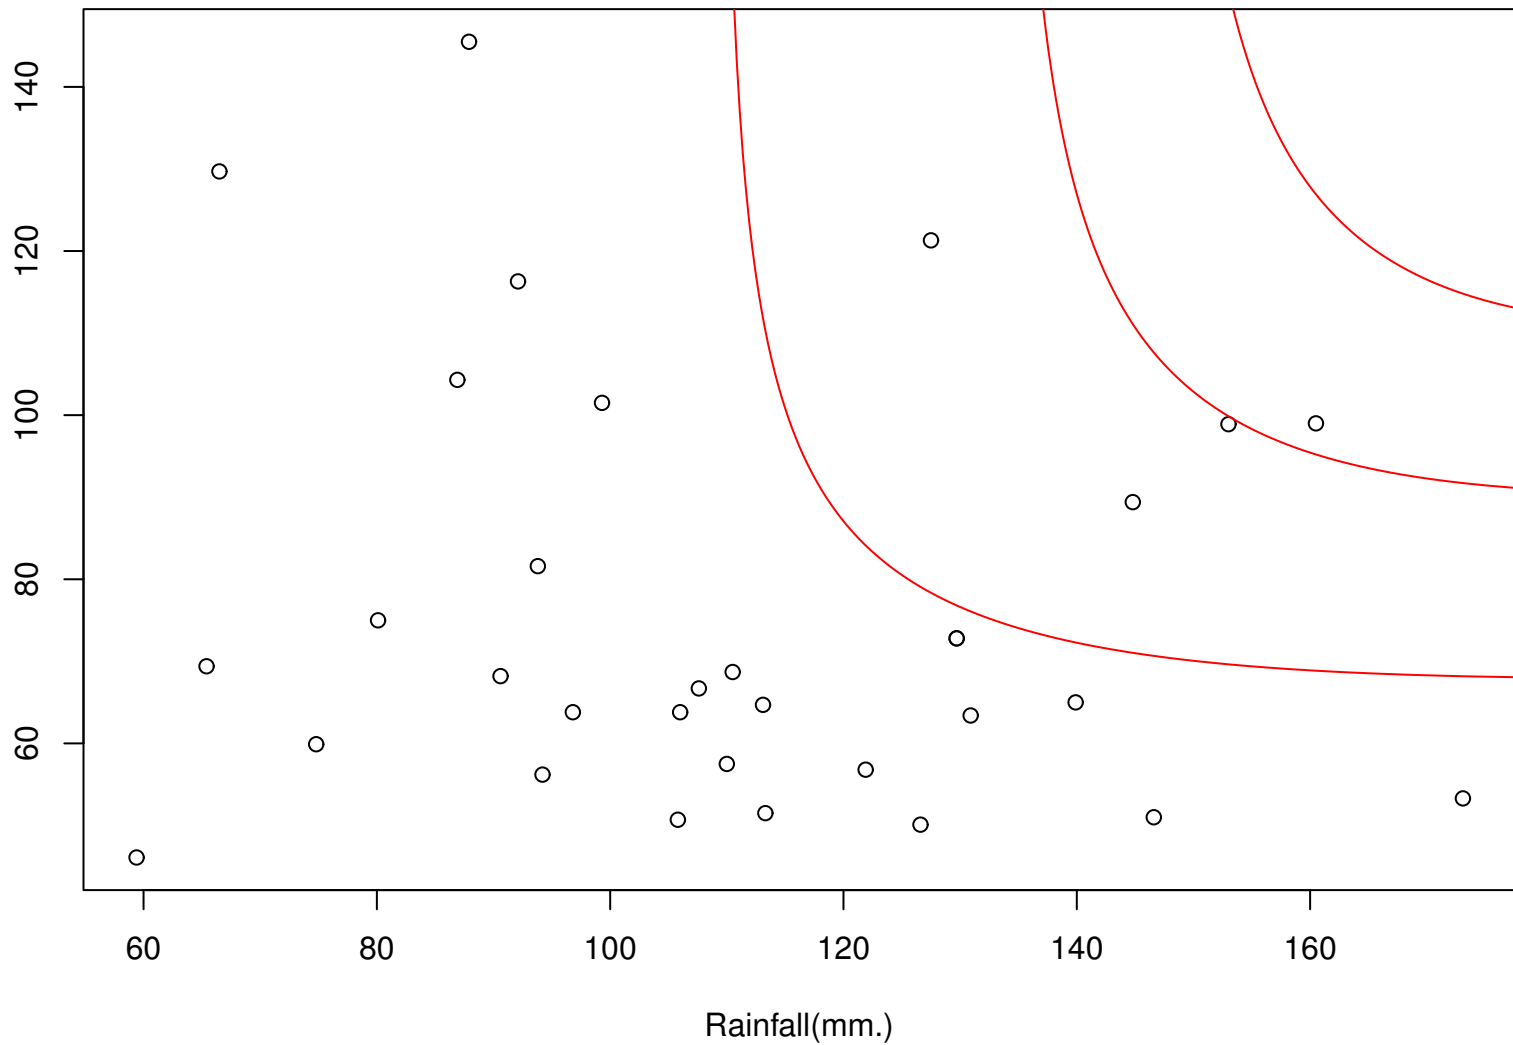

Supplement: s1 [file s1]

**Quantile curves**

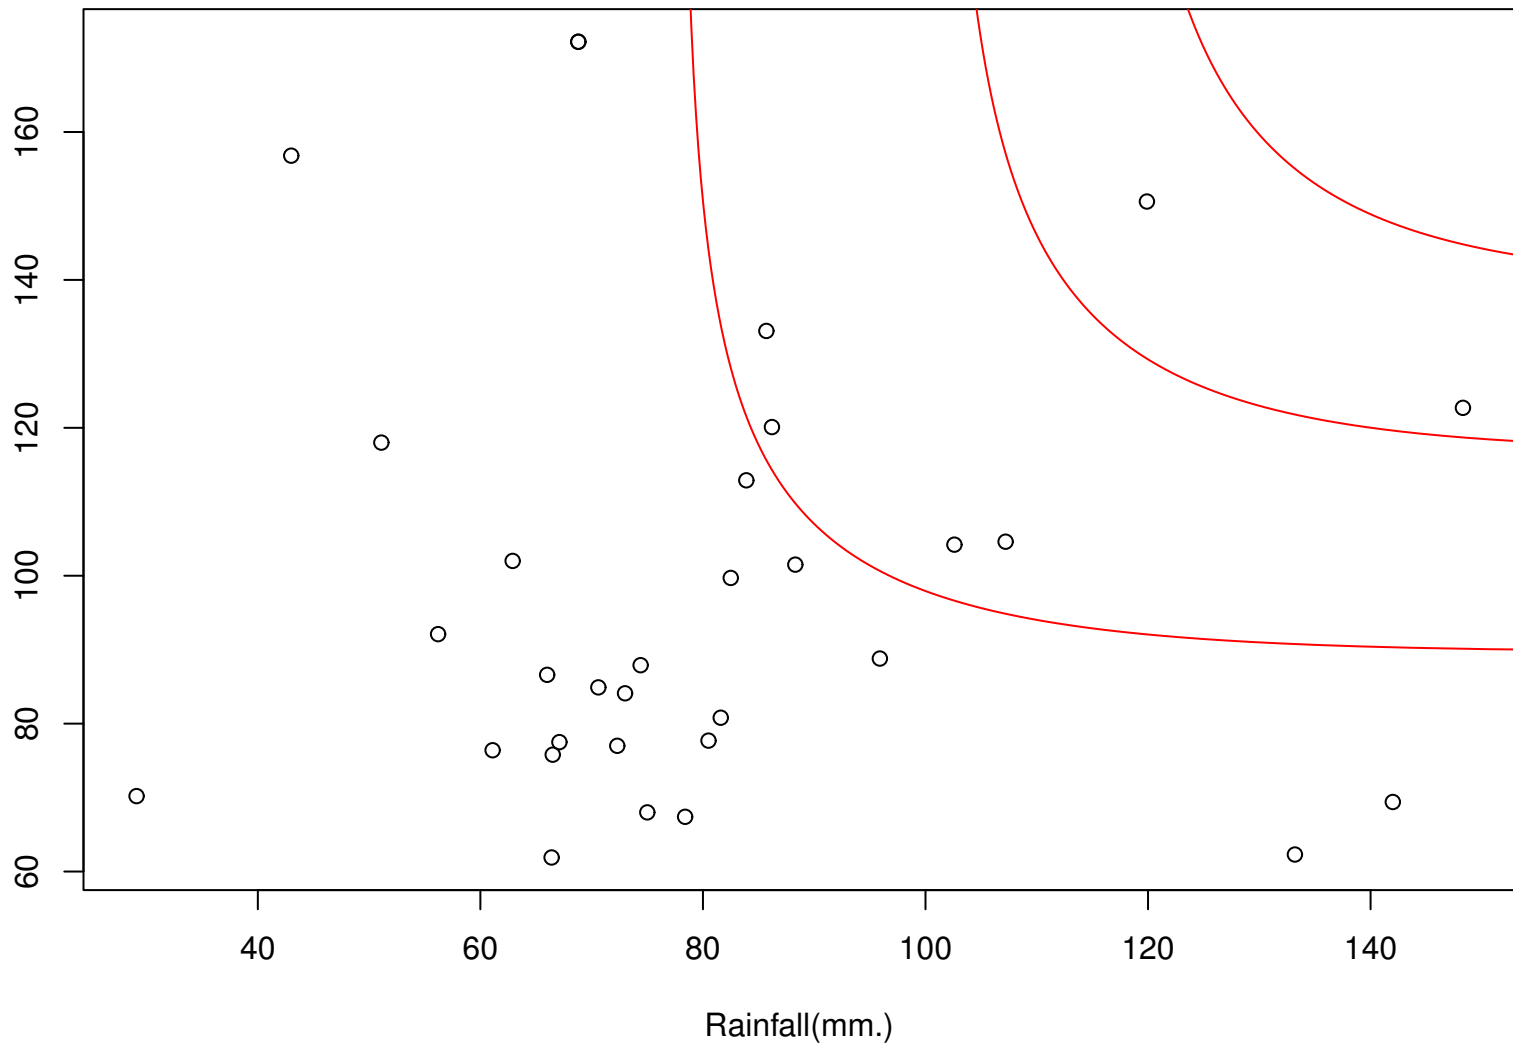

Supplement: s1 [file s1]

**Quantile curves**

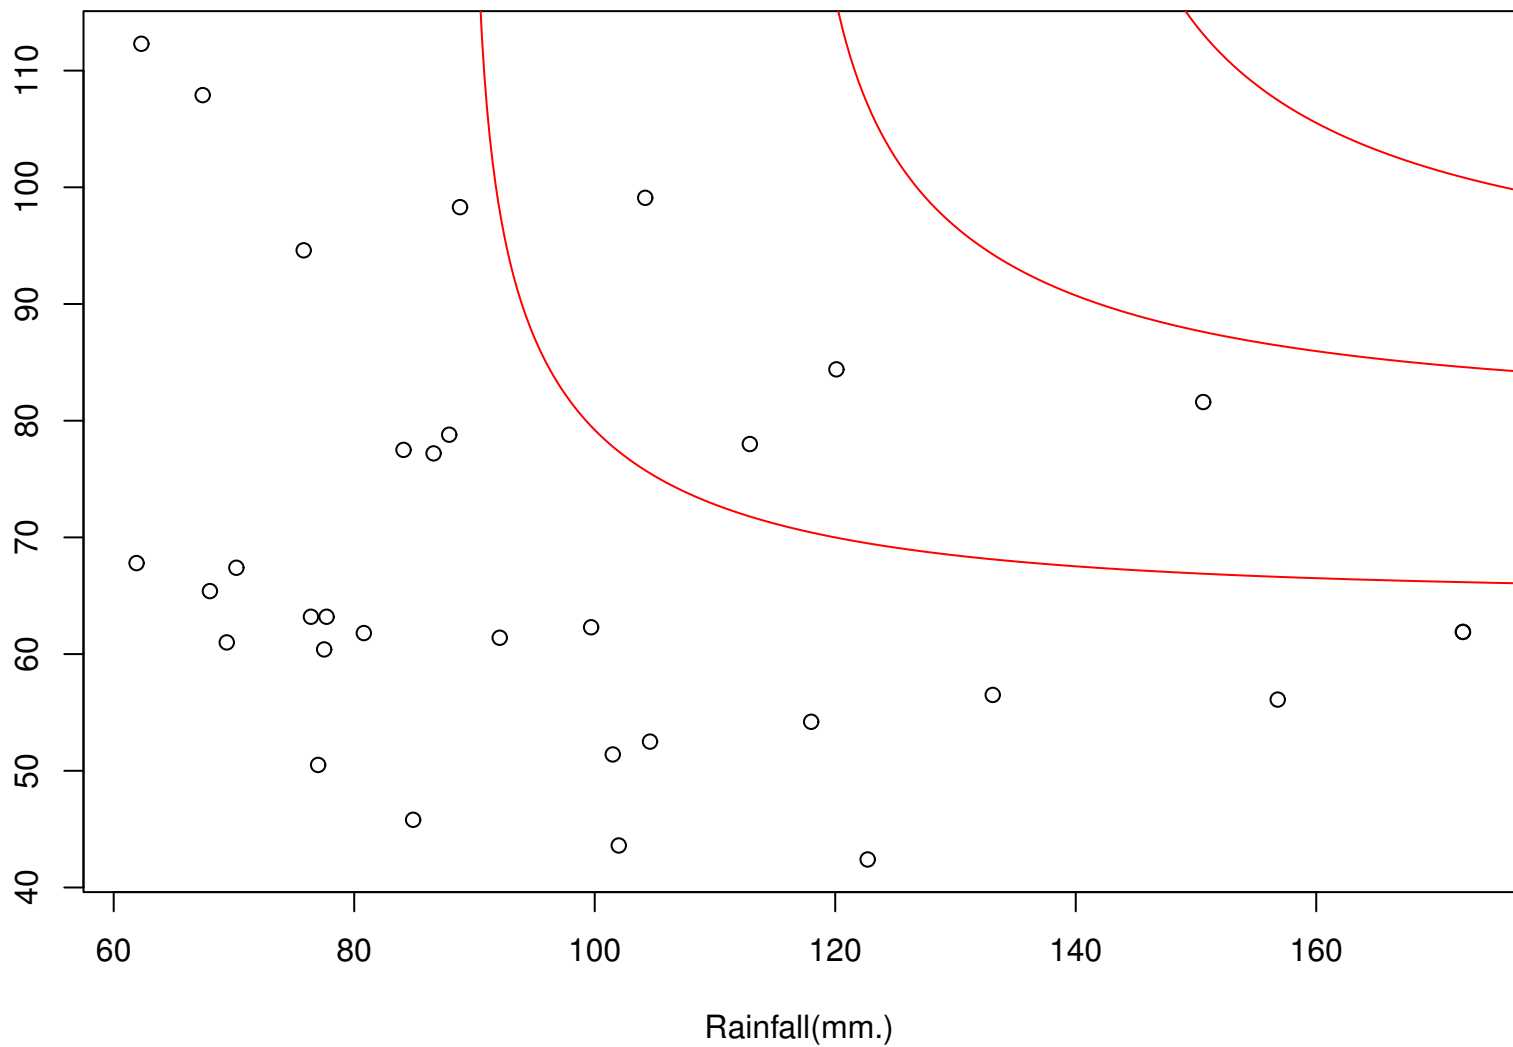

Supplement: s1 [file s1]

**Quantile curves**

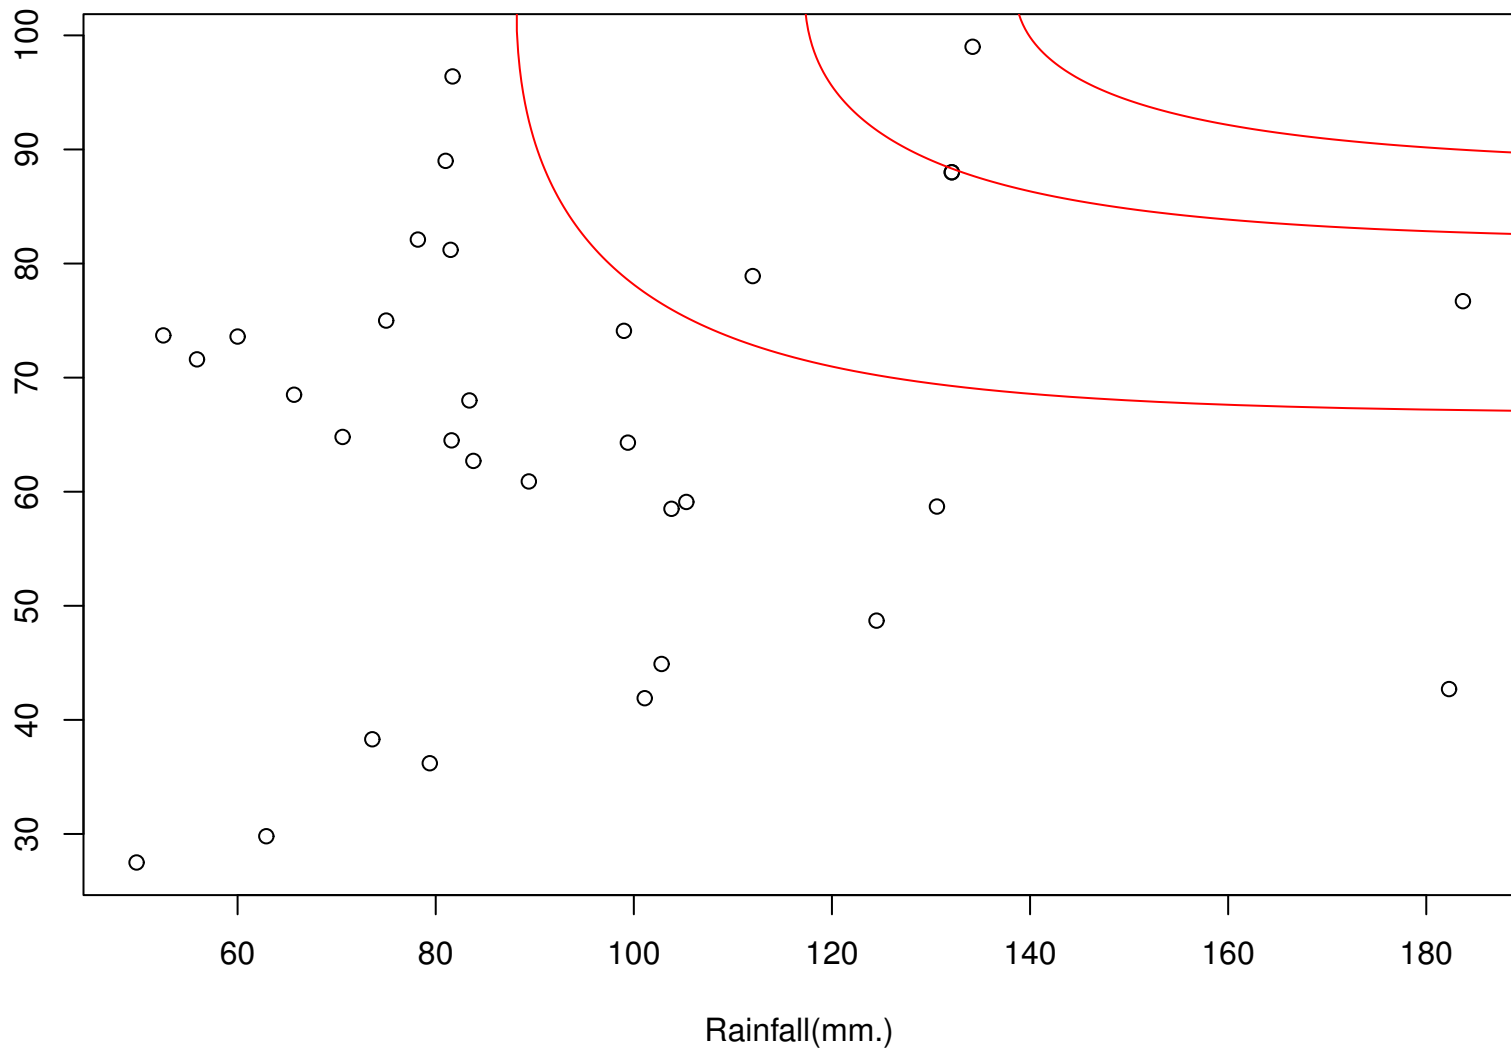

Supplement: s1 [file s1]

Quantile curves

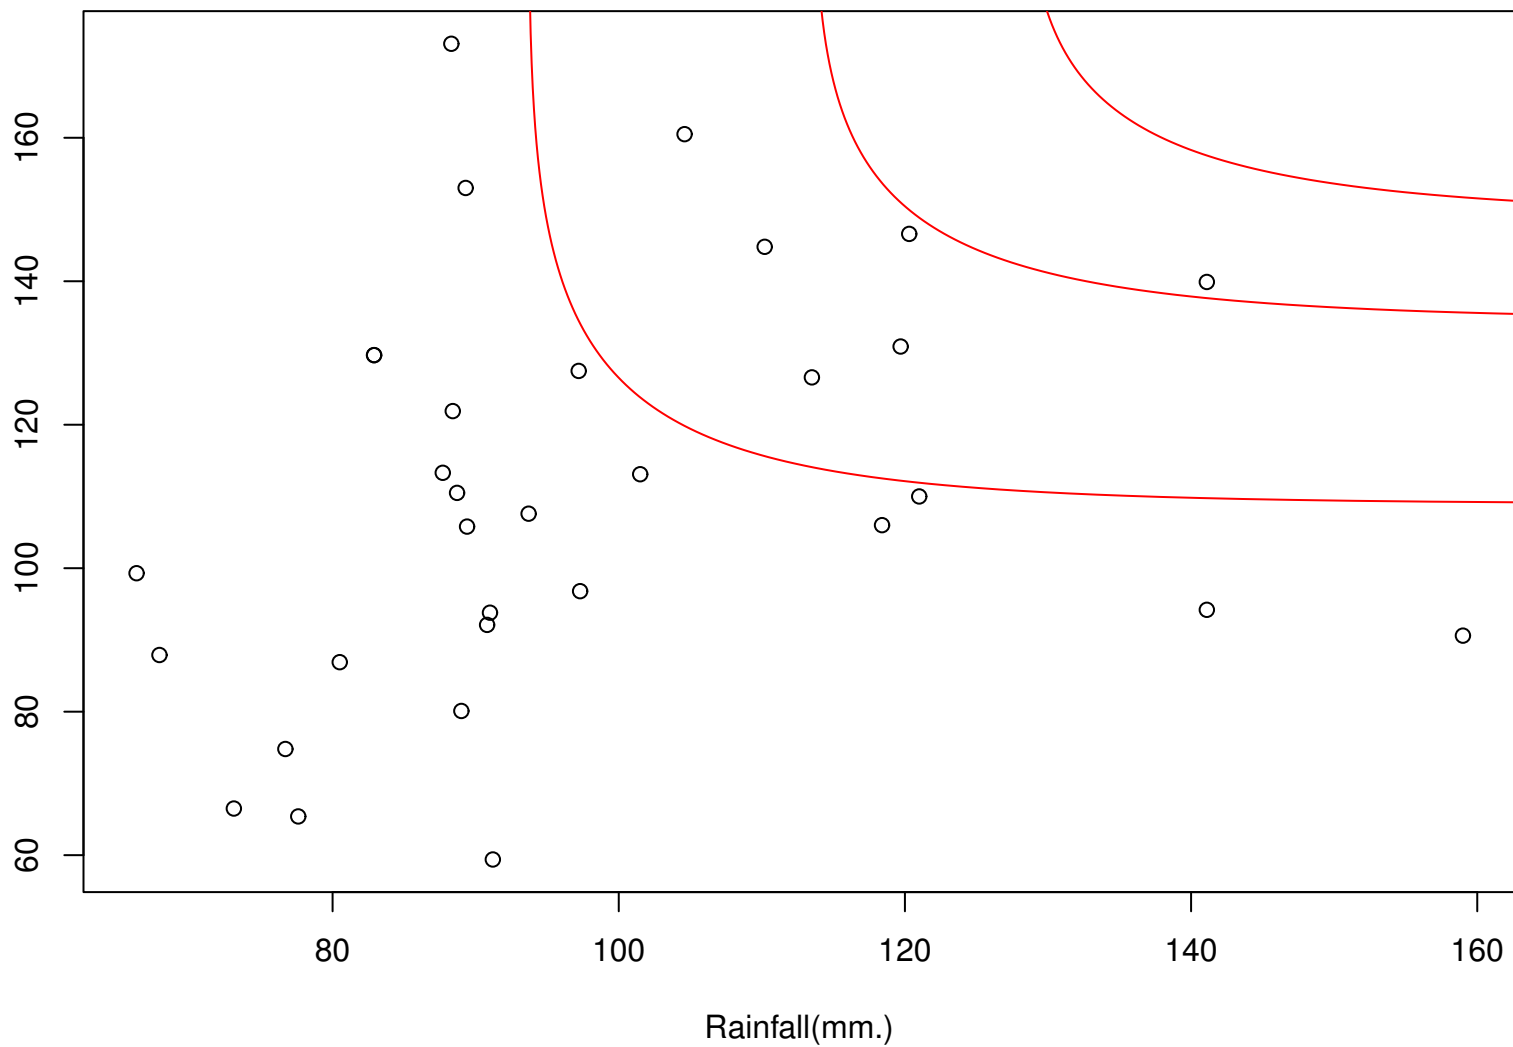

Supplement: s1 [file s1]

Quantile curves

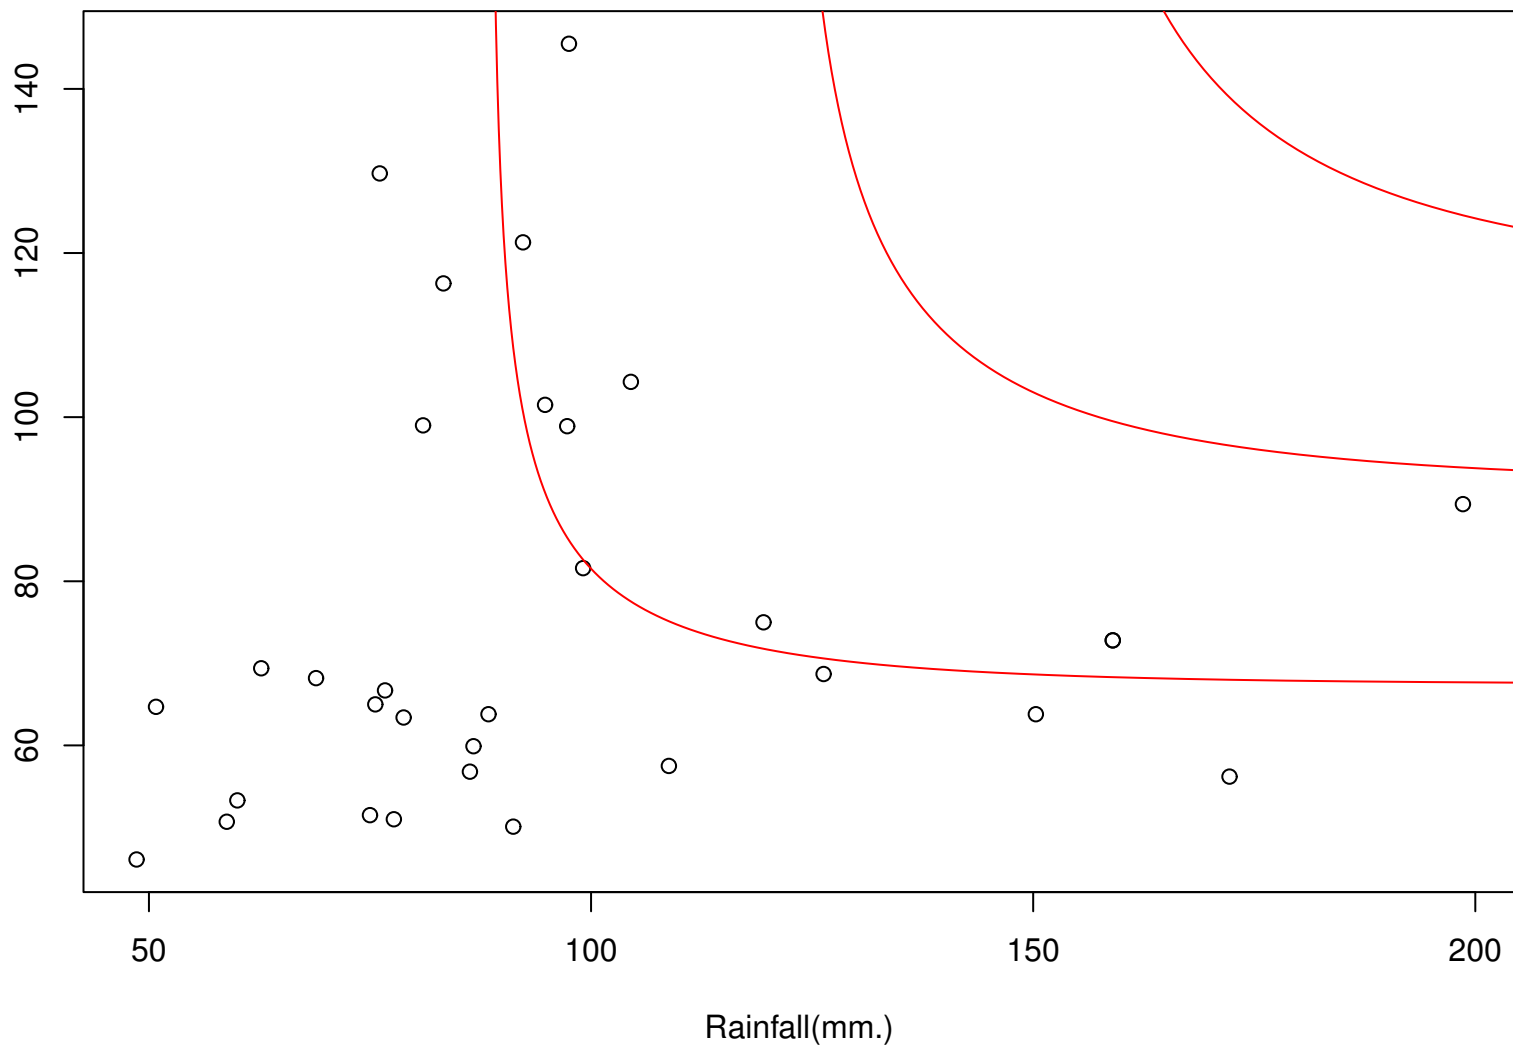

Supplement: s1 [file s1]

**Quantile curves**

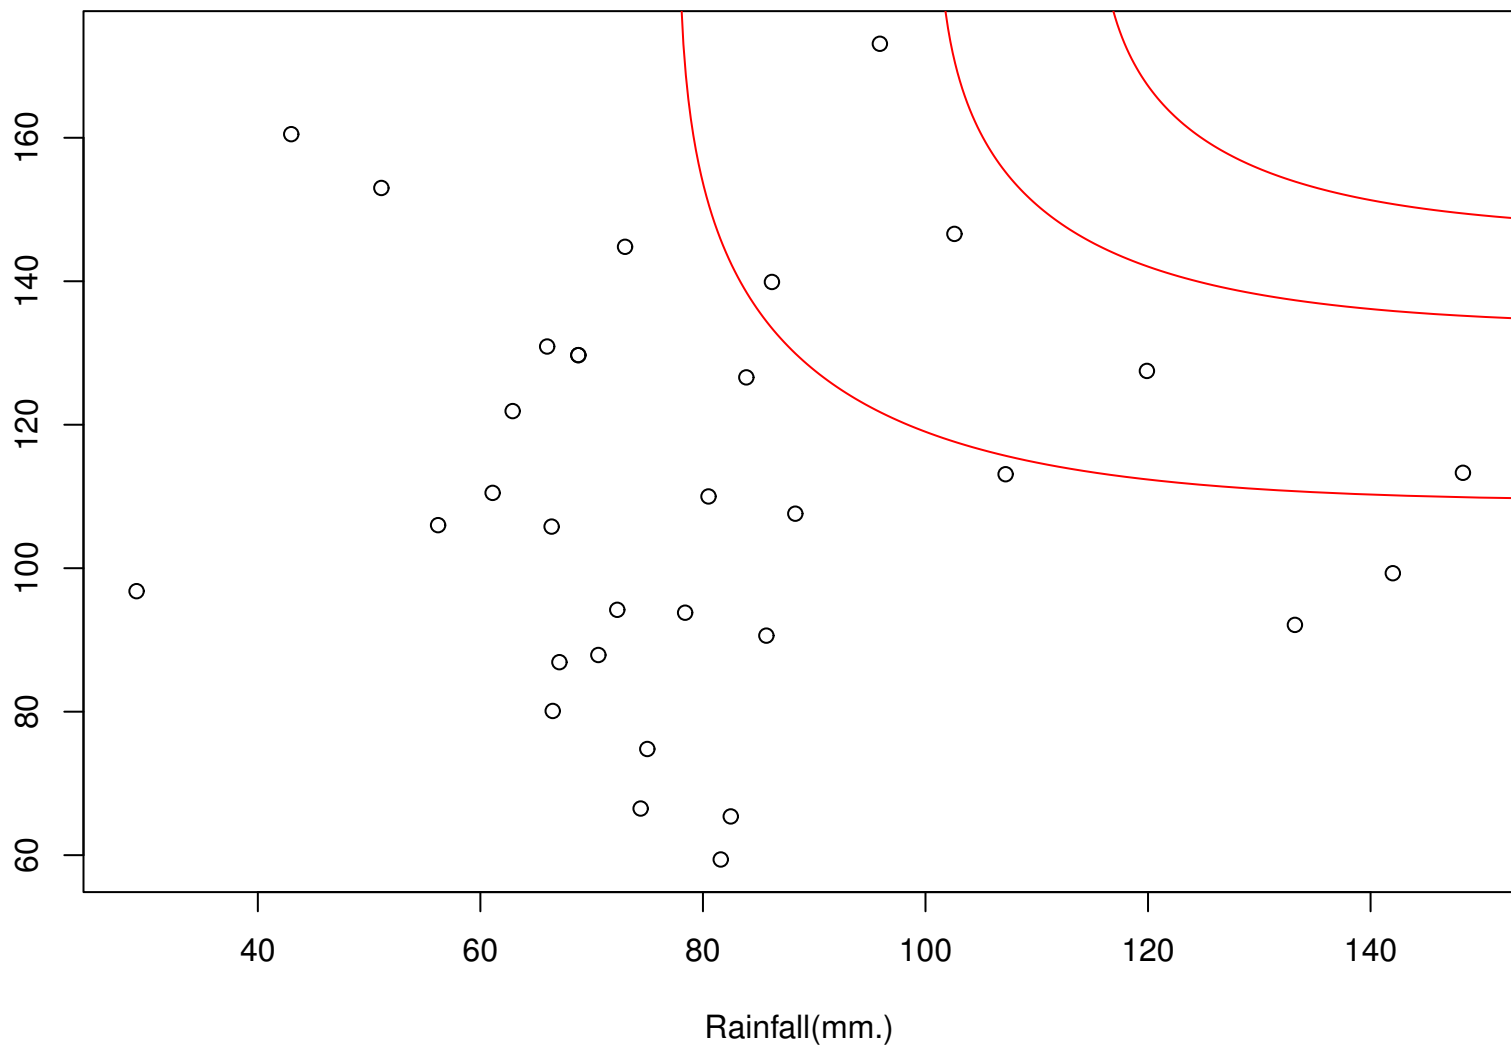

Supplement: s1 [file s1]

**Quantile curves**

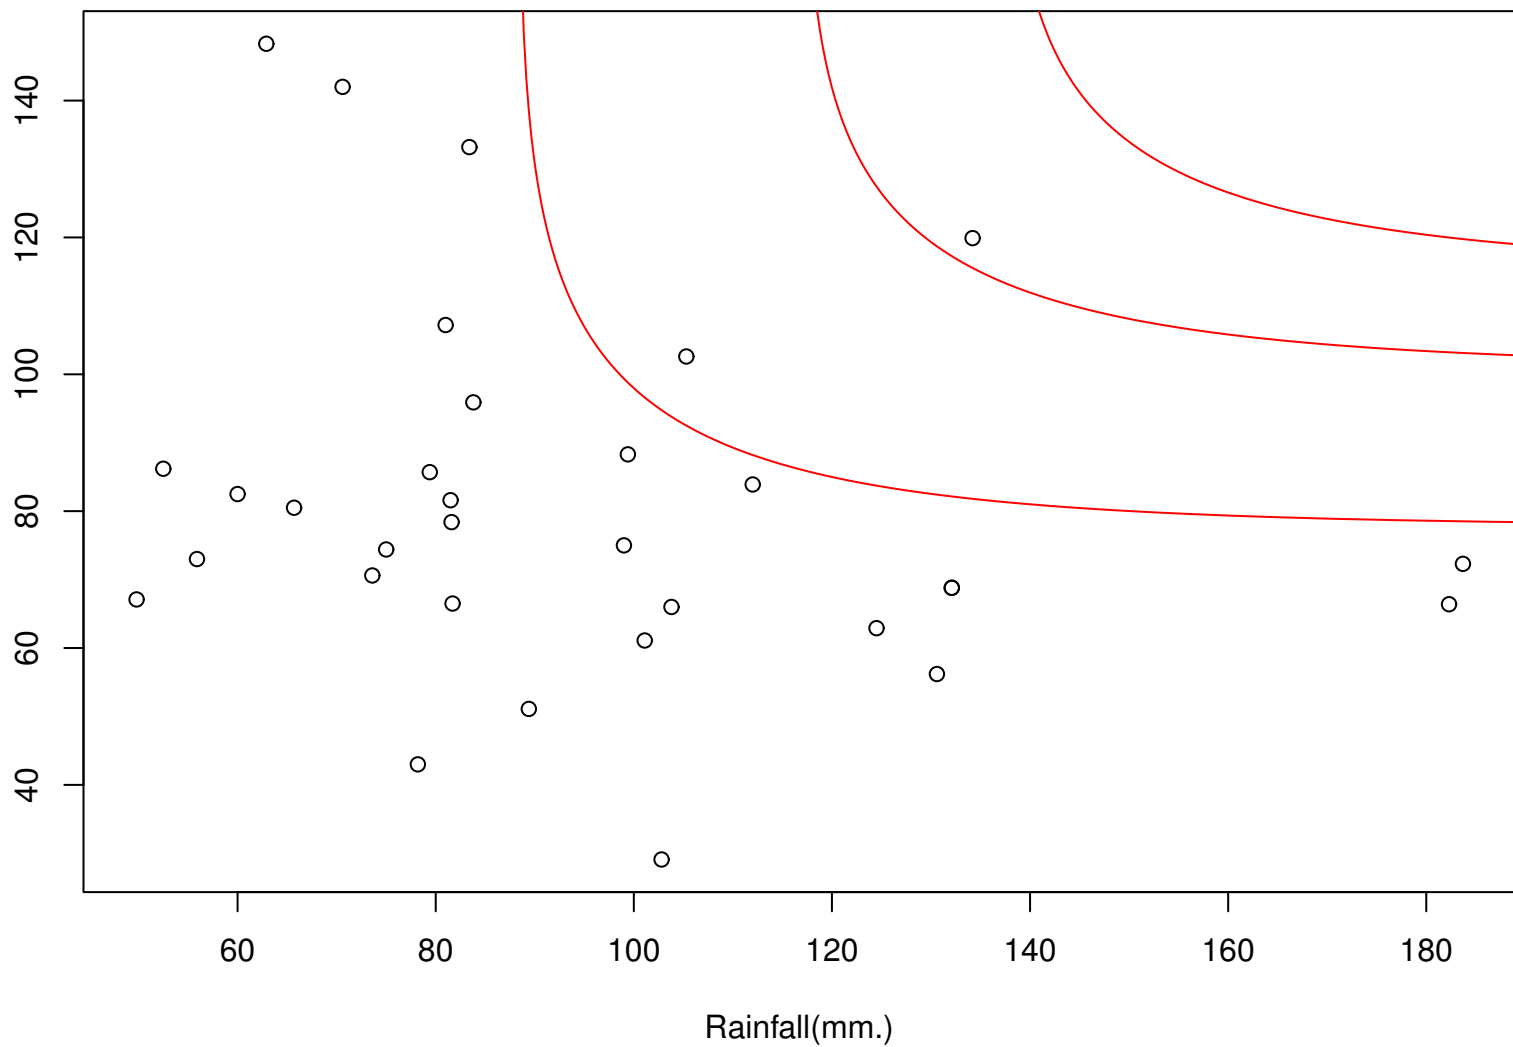

Supplement: s1 [file s1]

Quantile curves

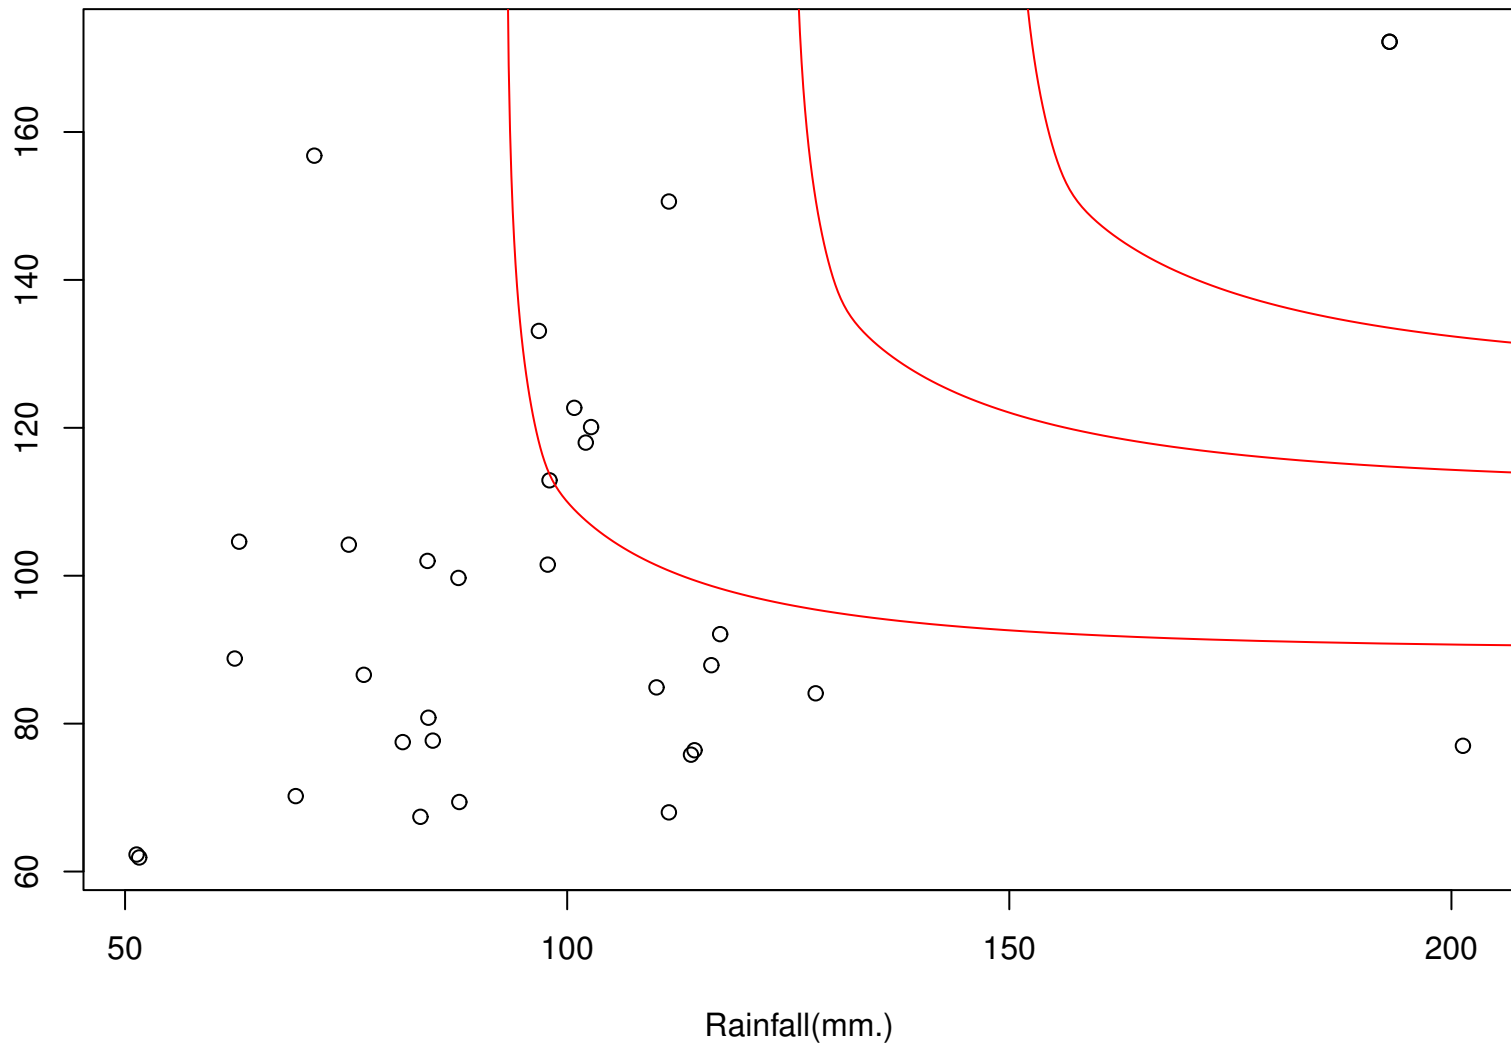

Supplement: s1 [file s1]

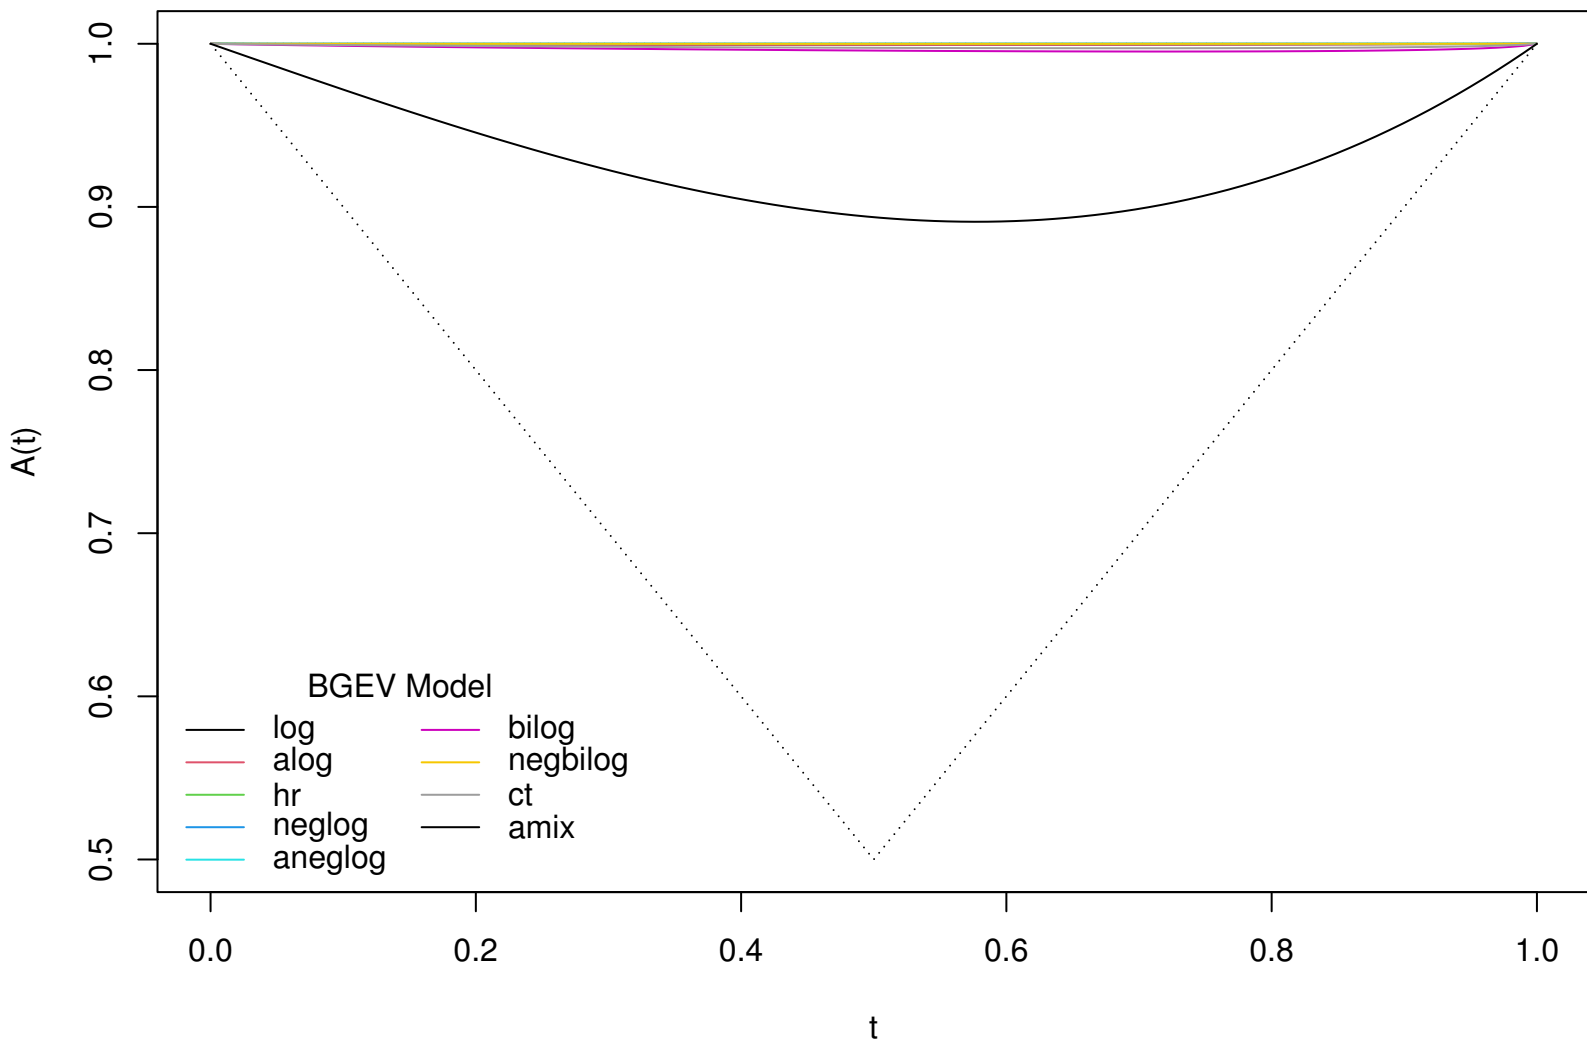

Supplement: s1 [file s1]

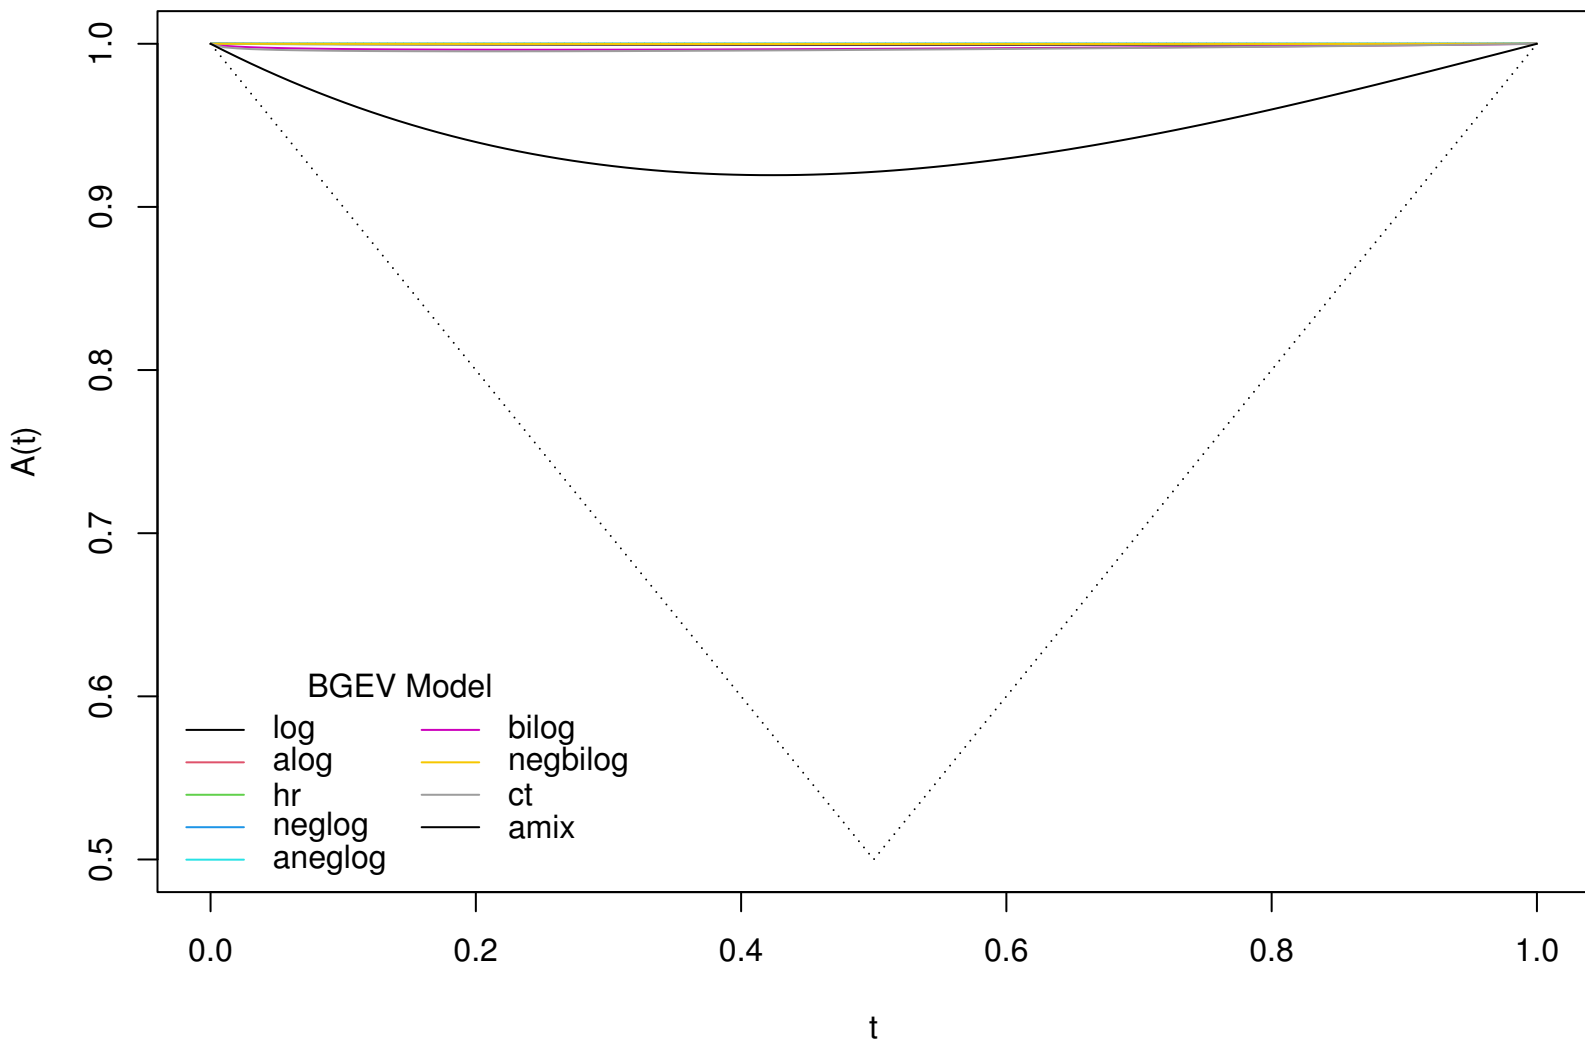

Supplement: s1 [file s1]

Quantile curves

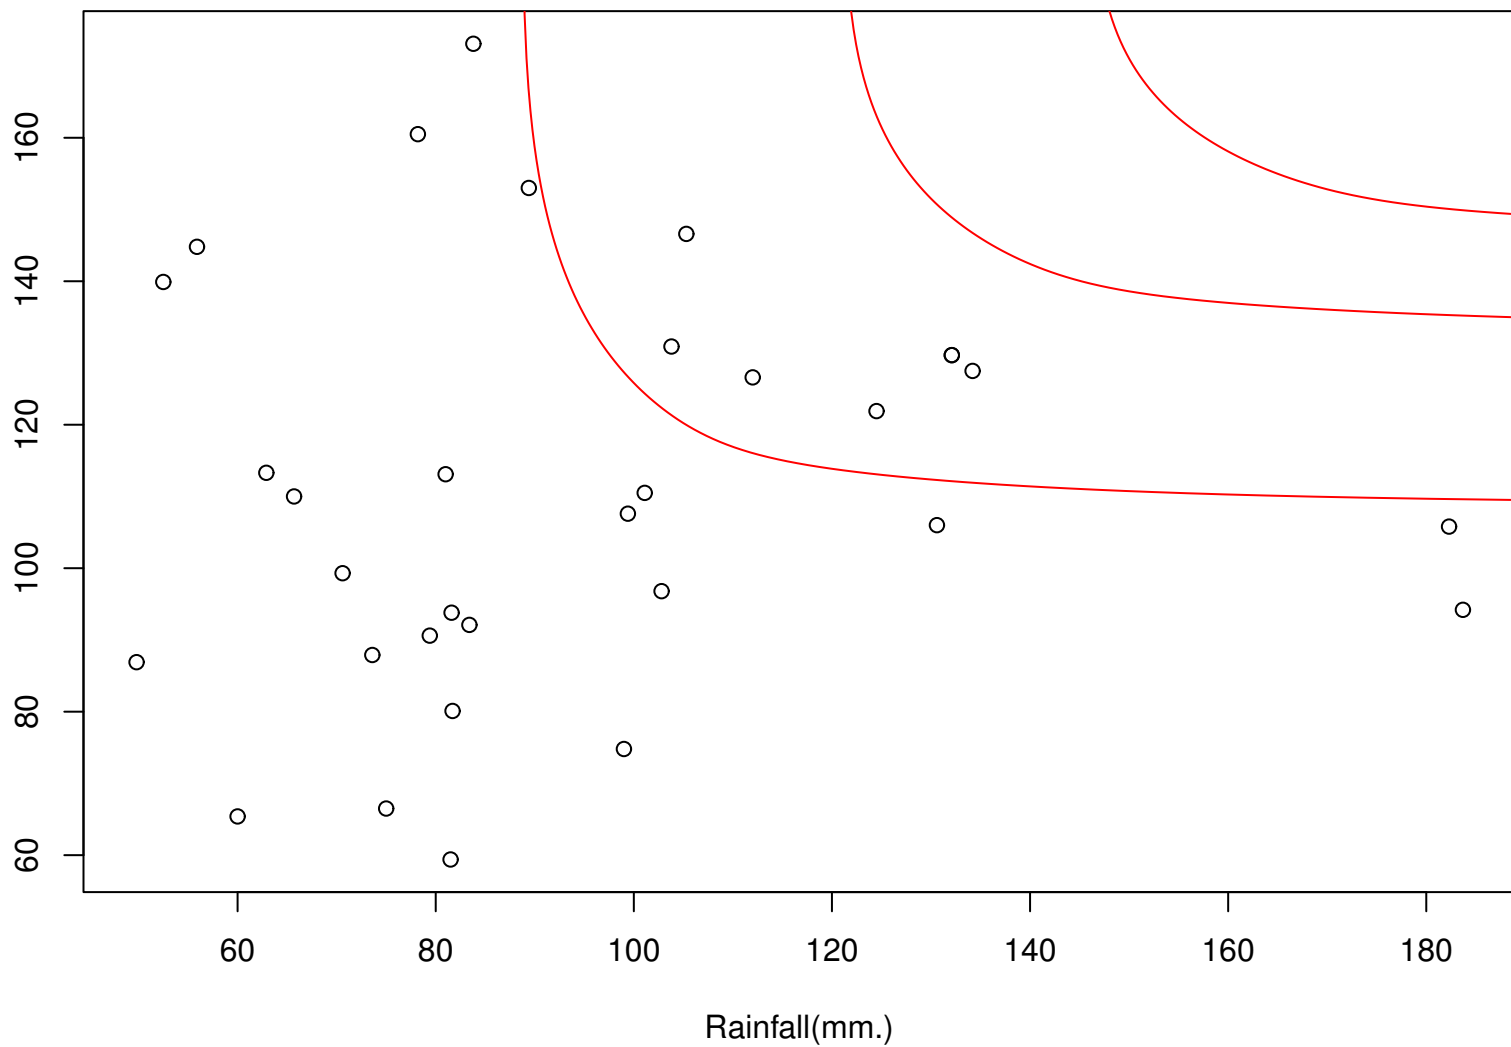

Supplement: s1 [file s1]

Quantile curves

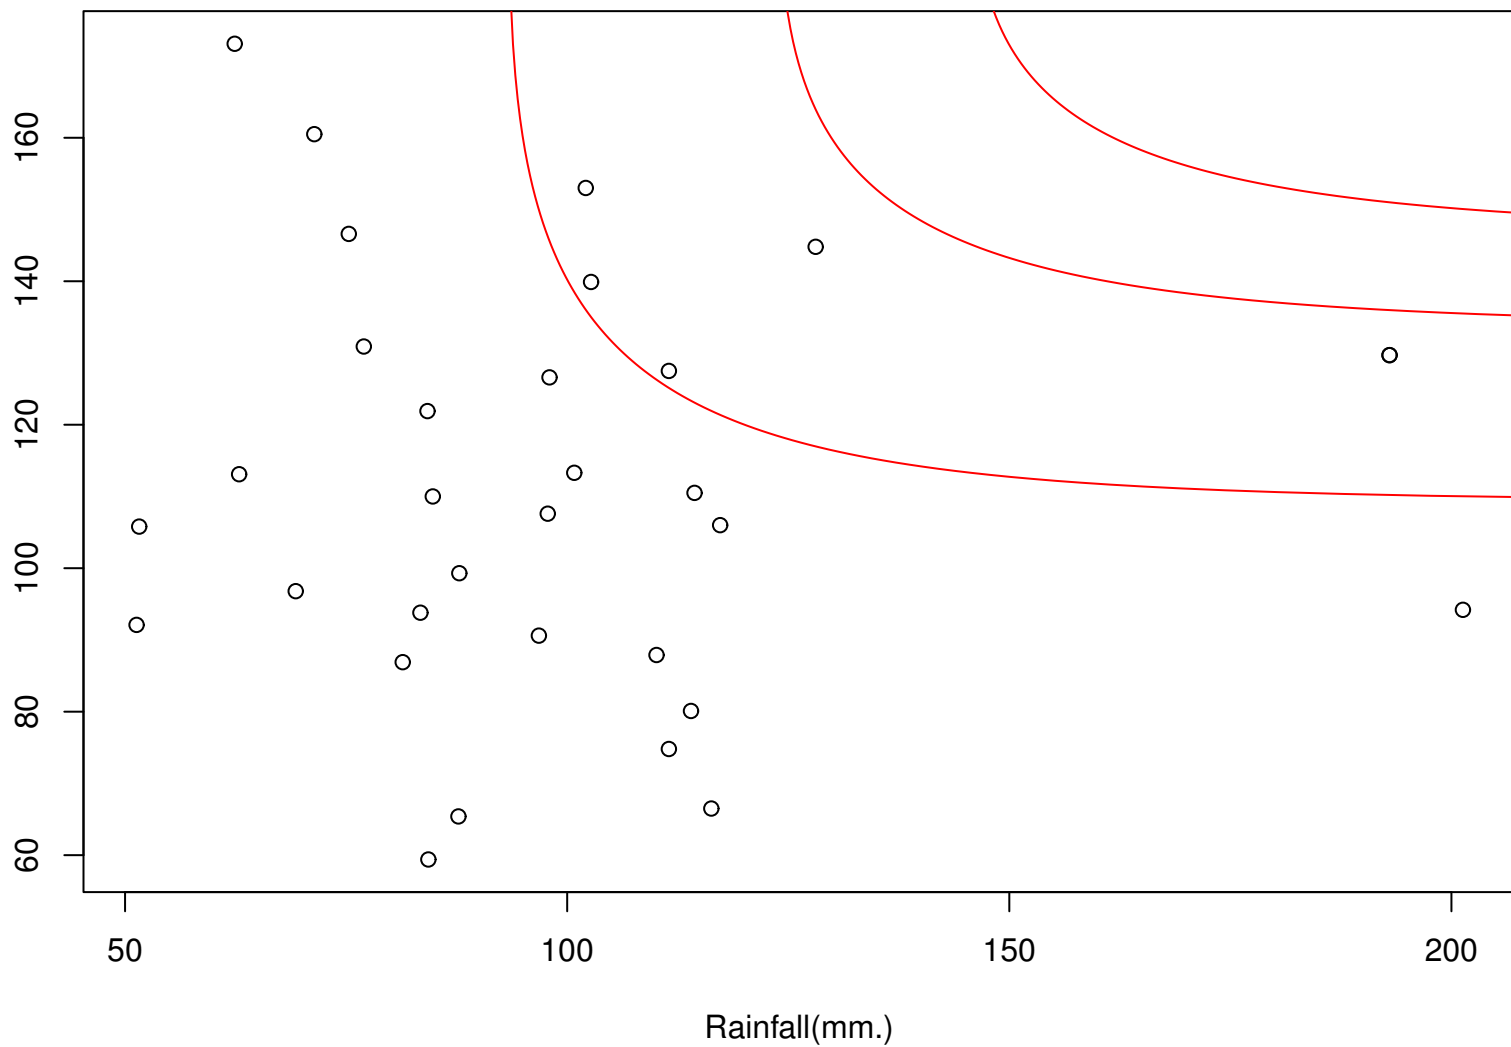

Supplement: s1 [file s1]

**Quantile curves**

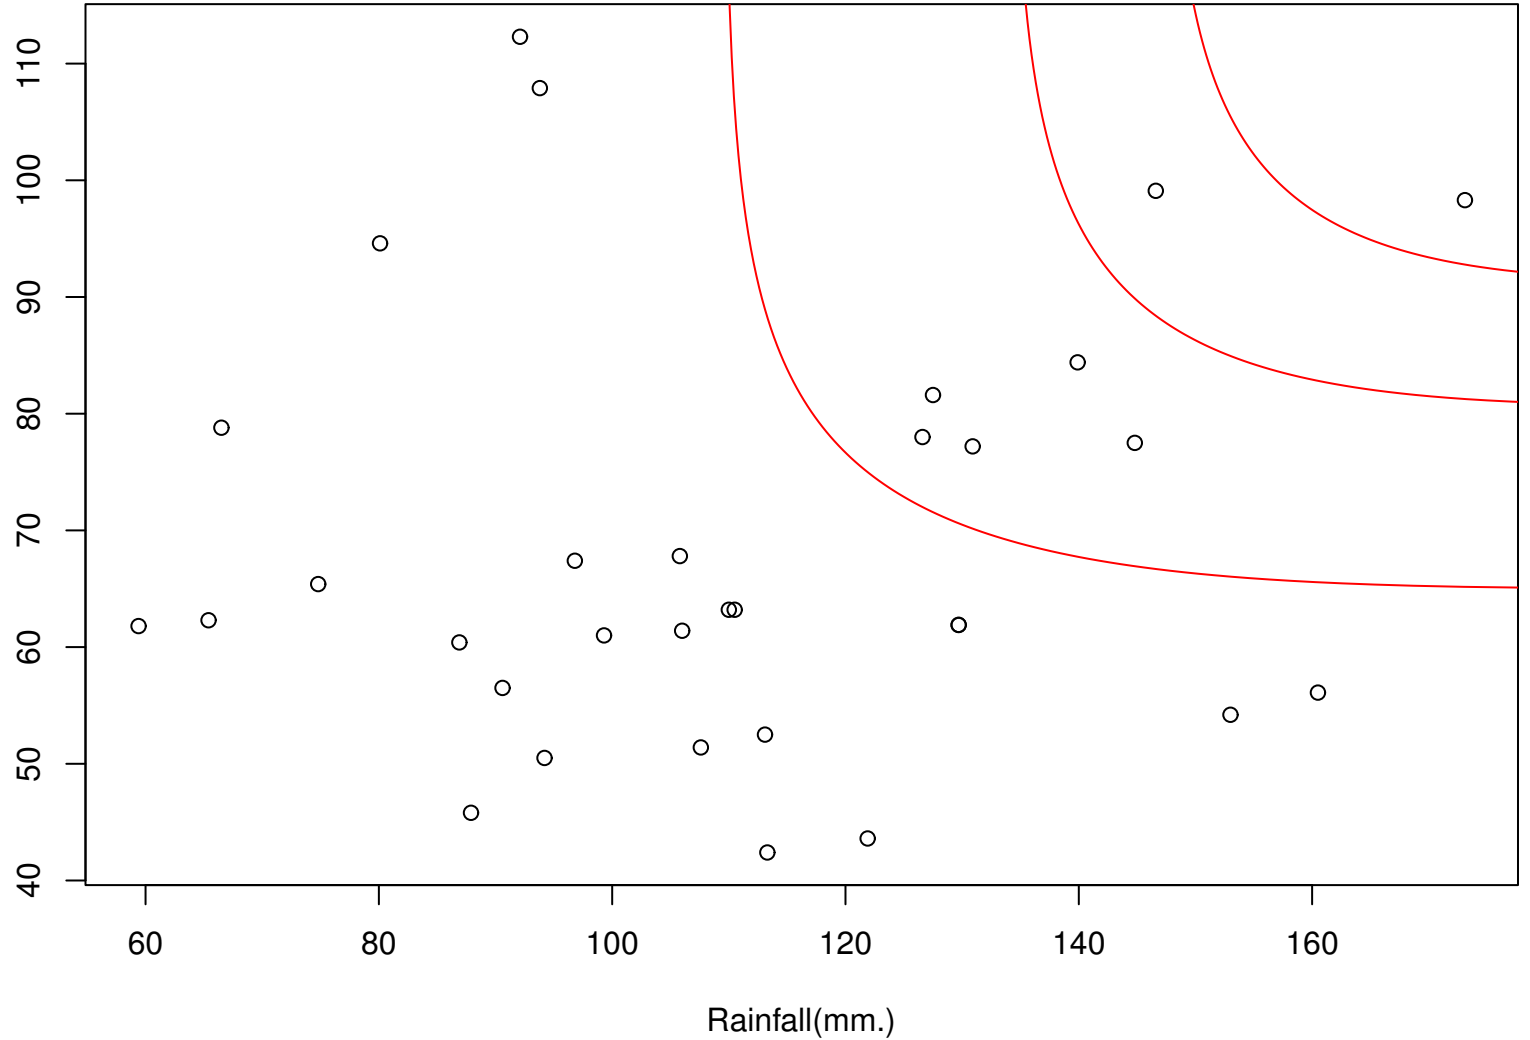

Supplement: s1 [file s1]

Quantile curves

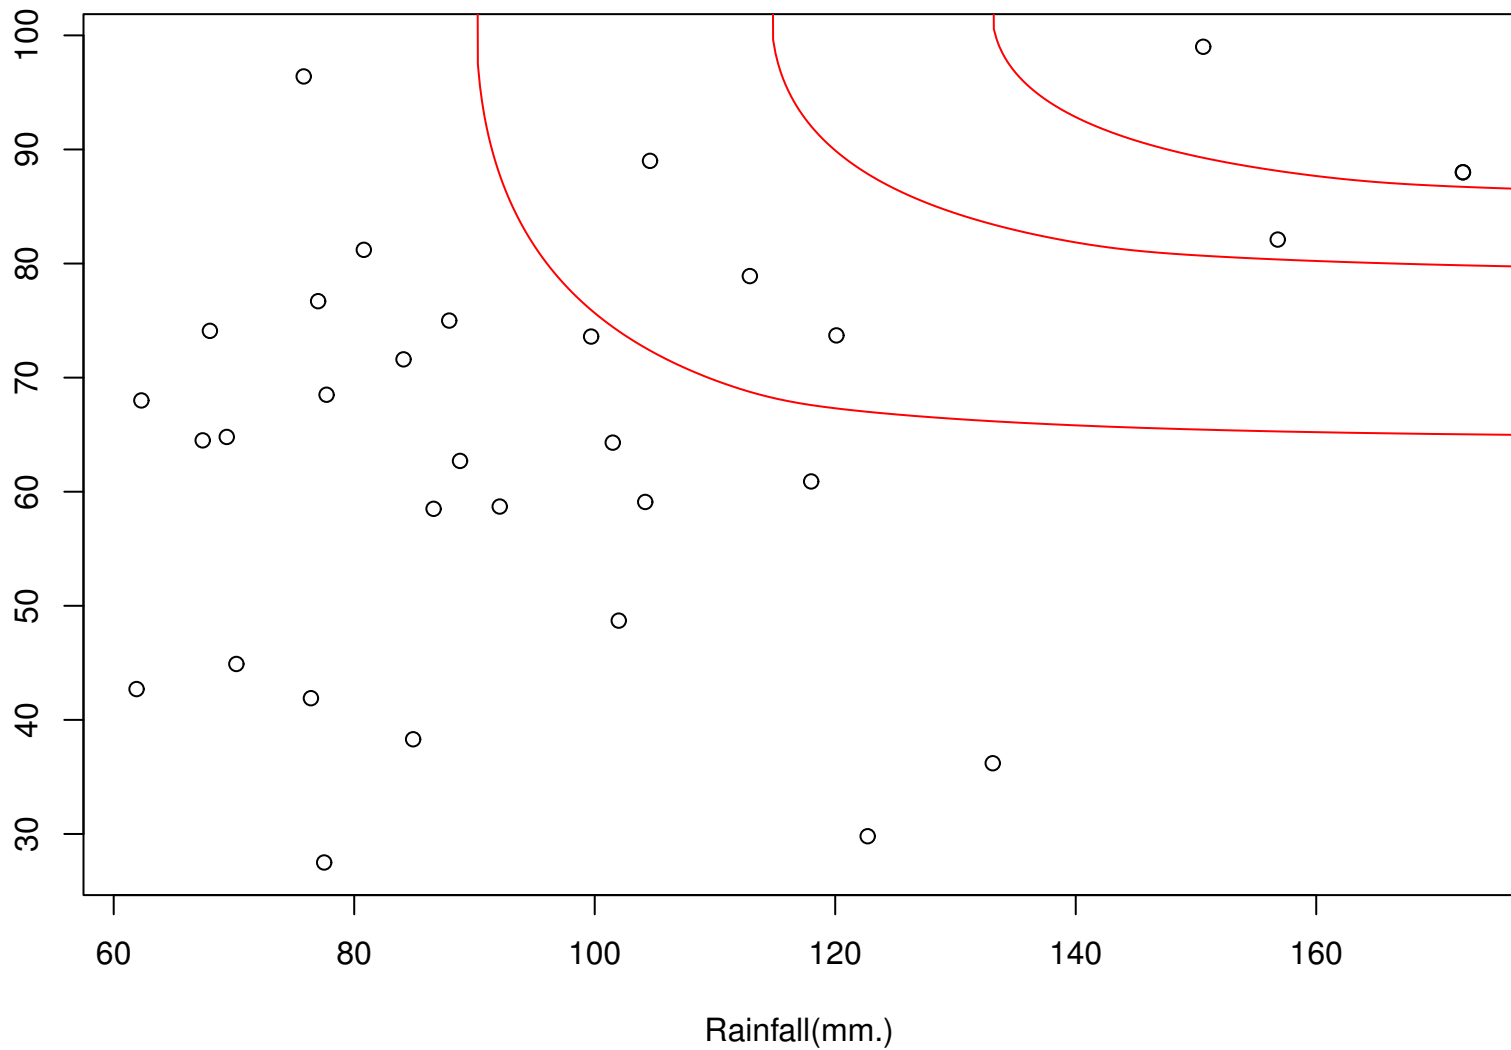

Supplement: s1 [file s1]

Quantile curves

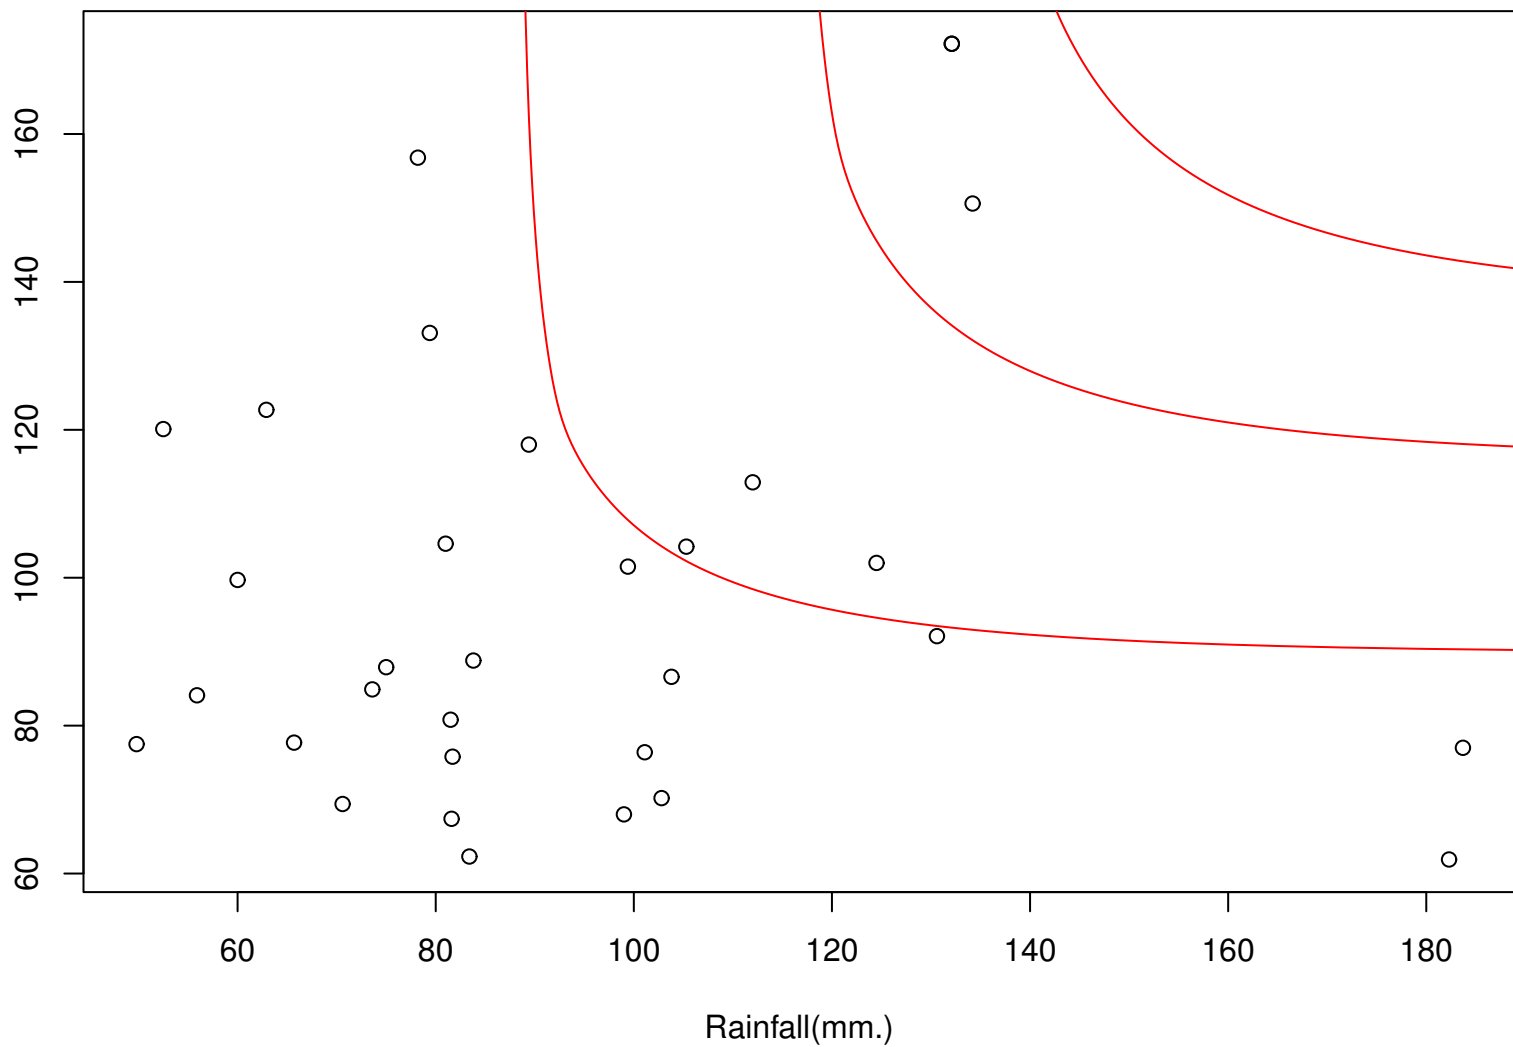

Supplement: s1 [file s1]

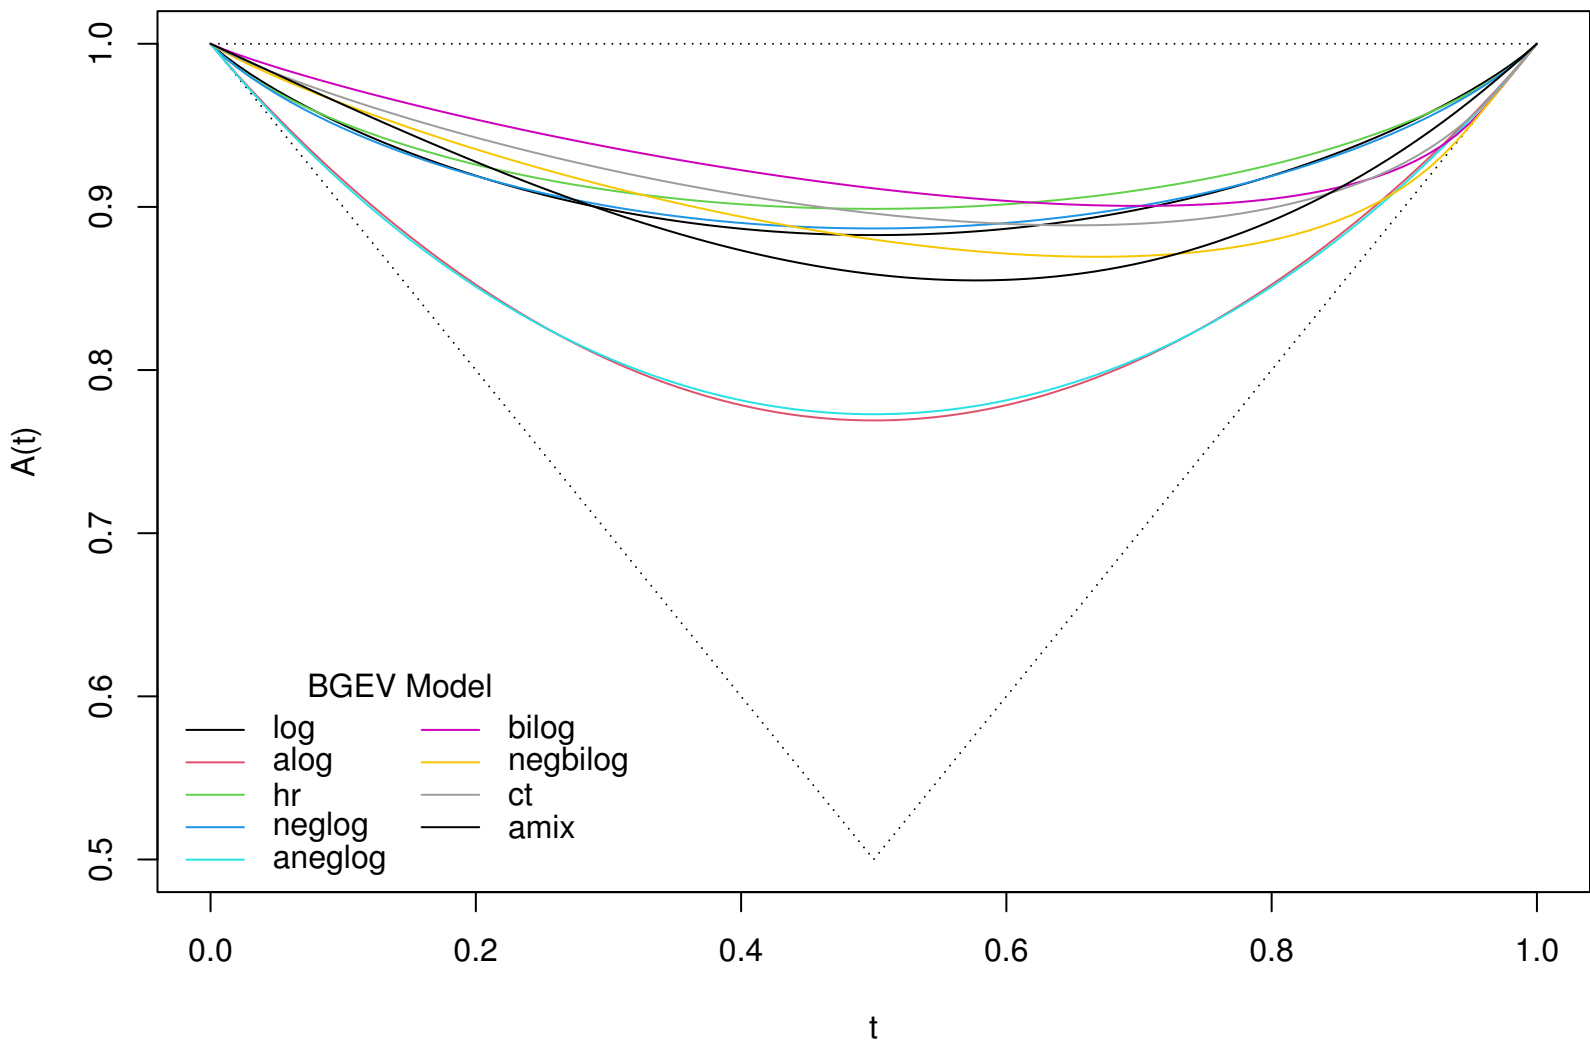

Supplement: s1 [file s1]

Quantile curves

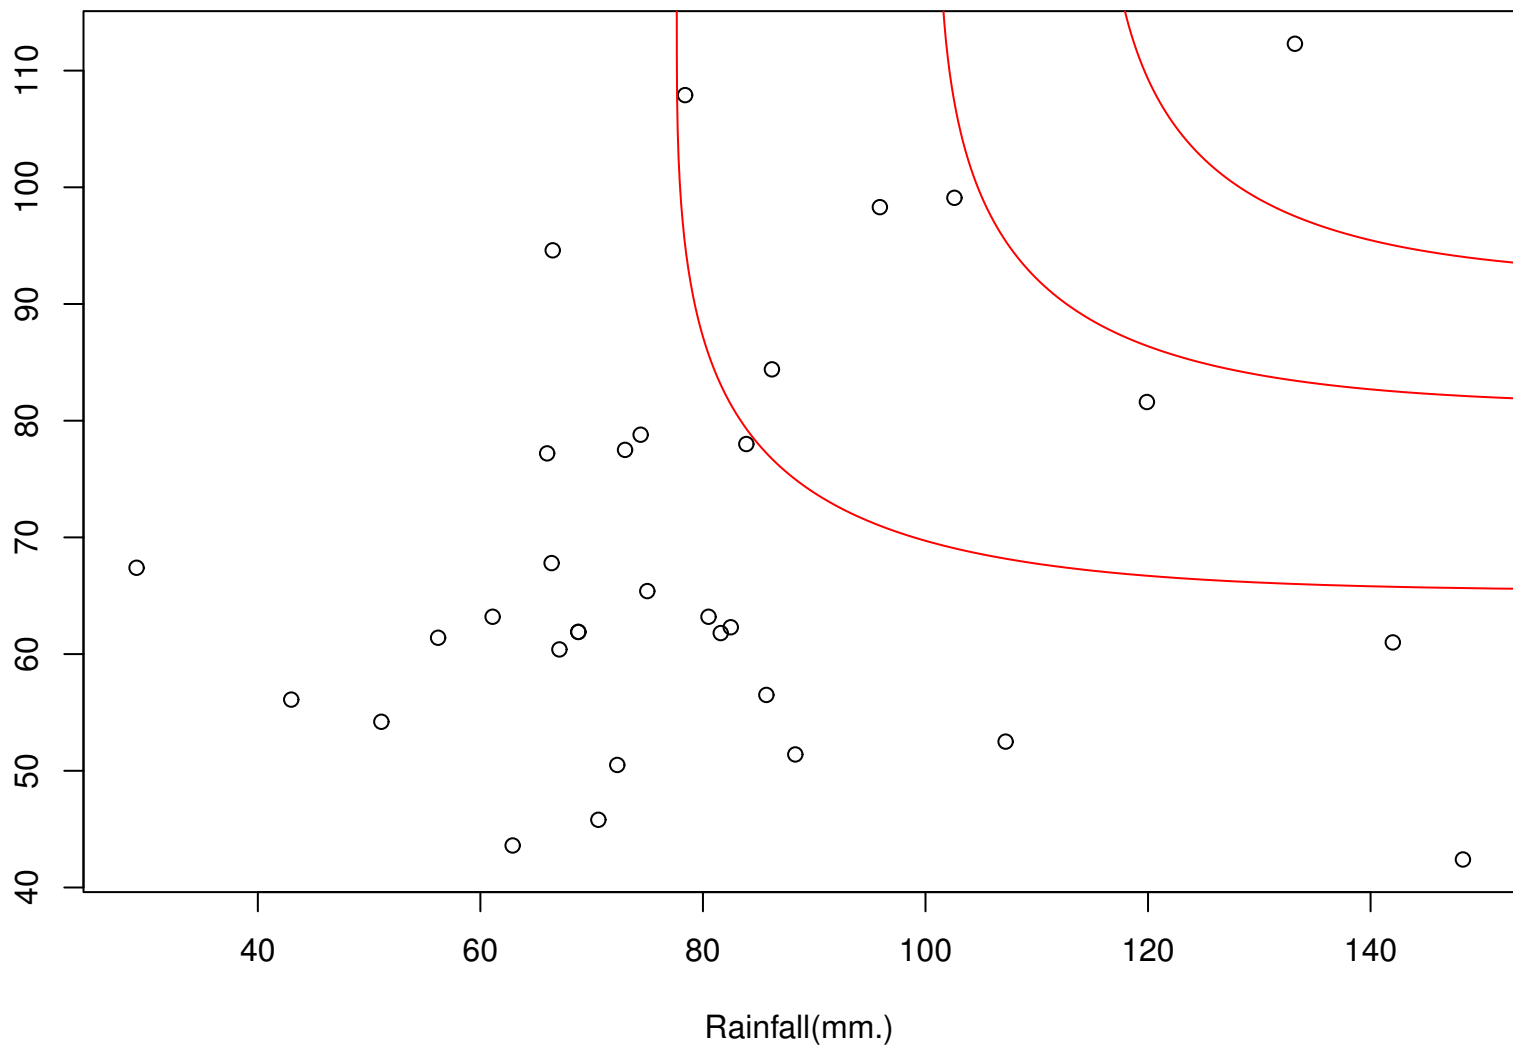

Supplement: s1 [file s1]

**Quantile curves**

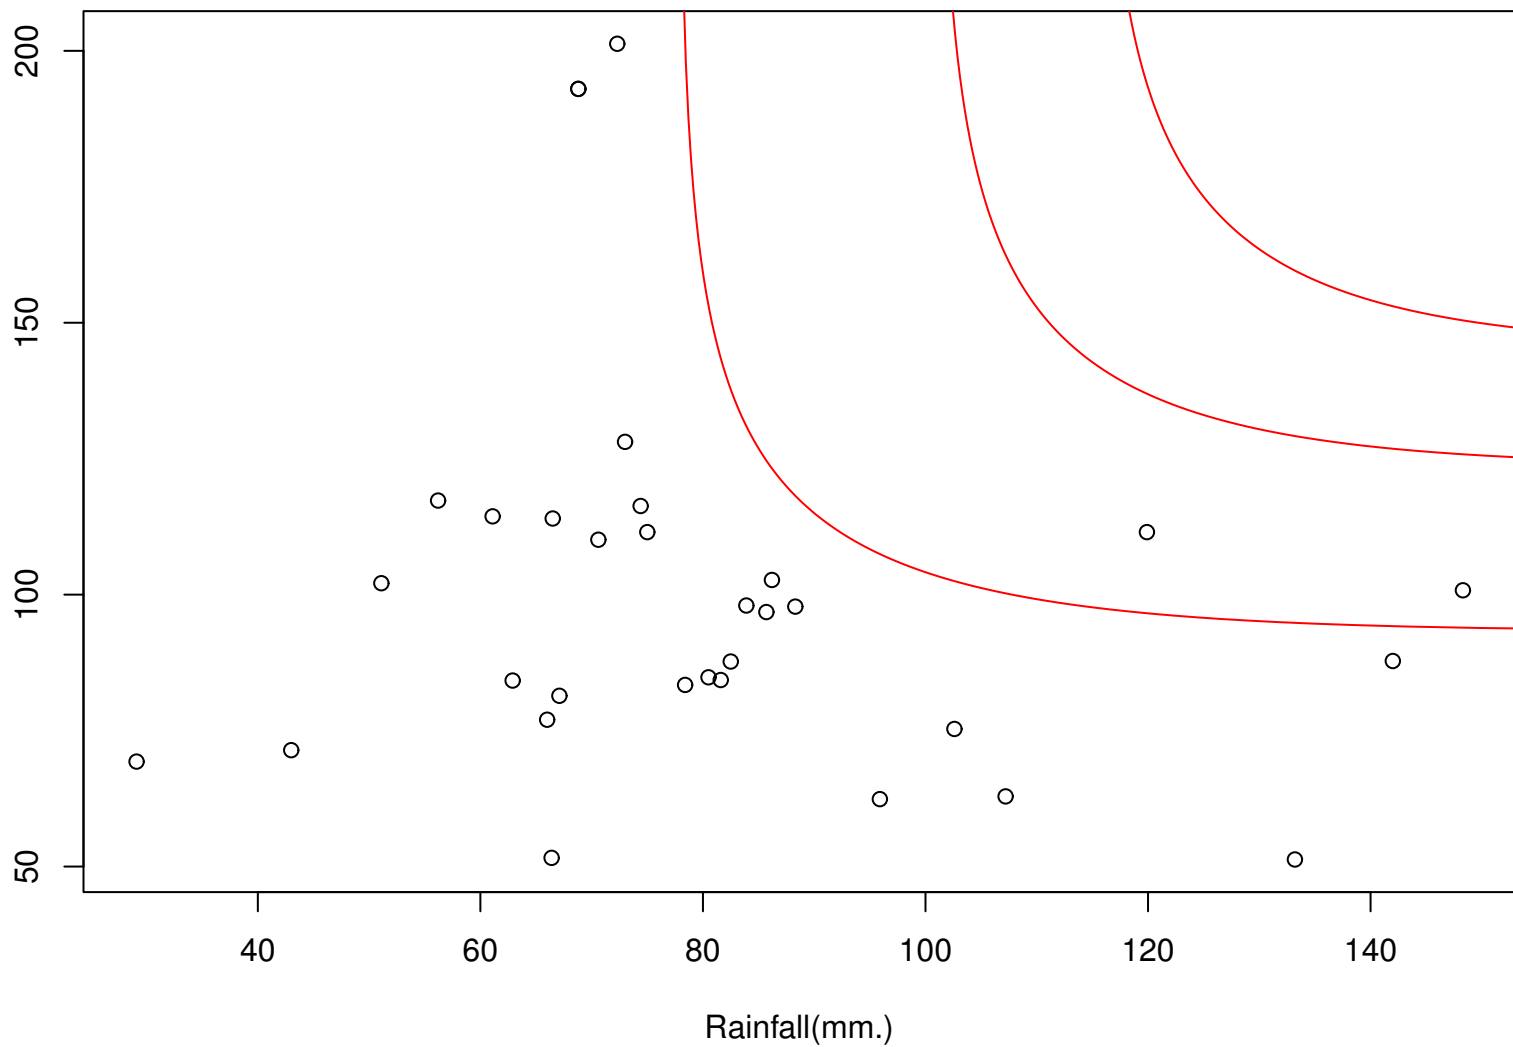

Supplement: s1 [file s1]

Quantile curves



Supplement: s1 [file s1]

Quantile curves

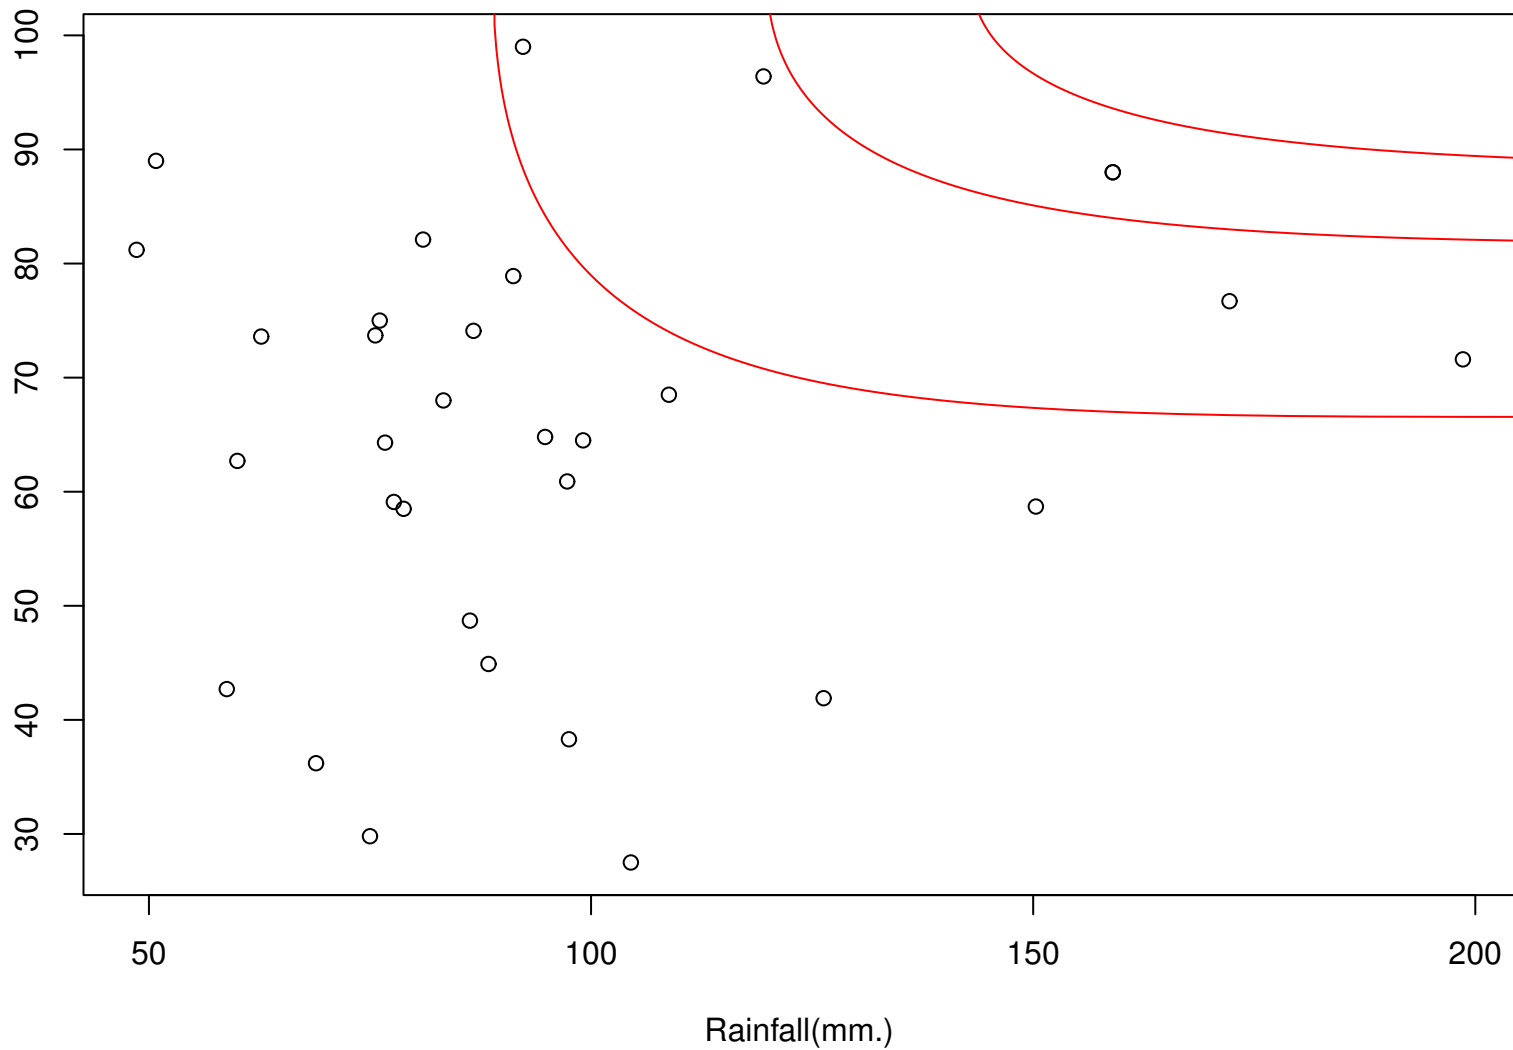

Supplement: s1 [file s1]

**Quantile curves**

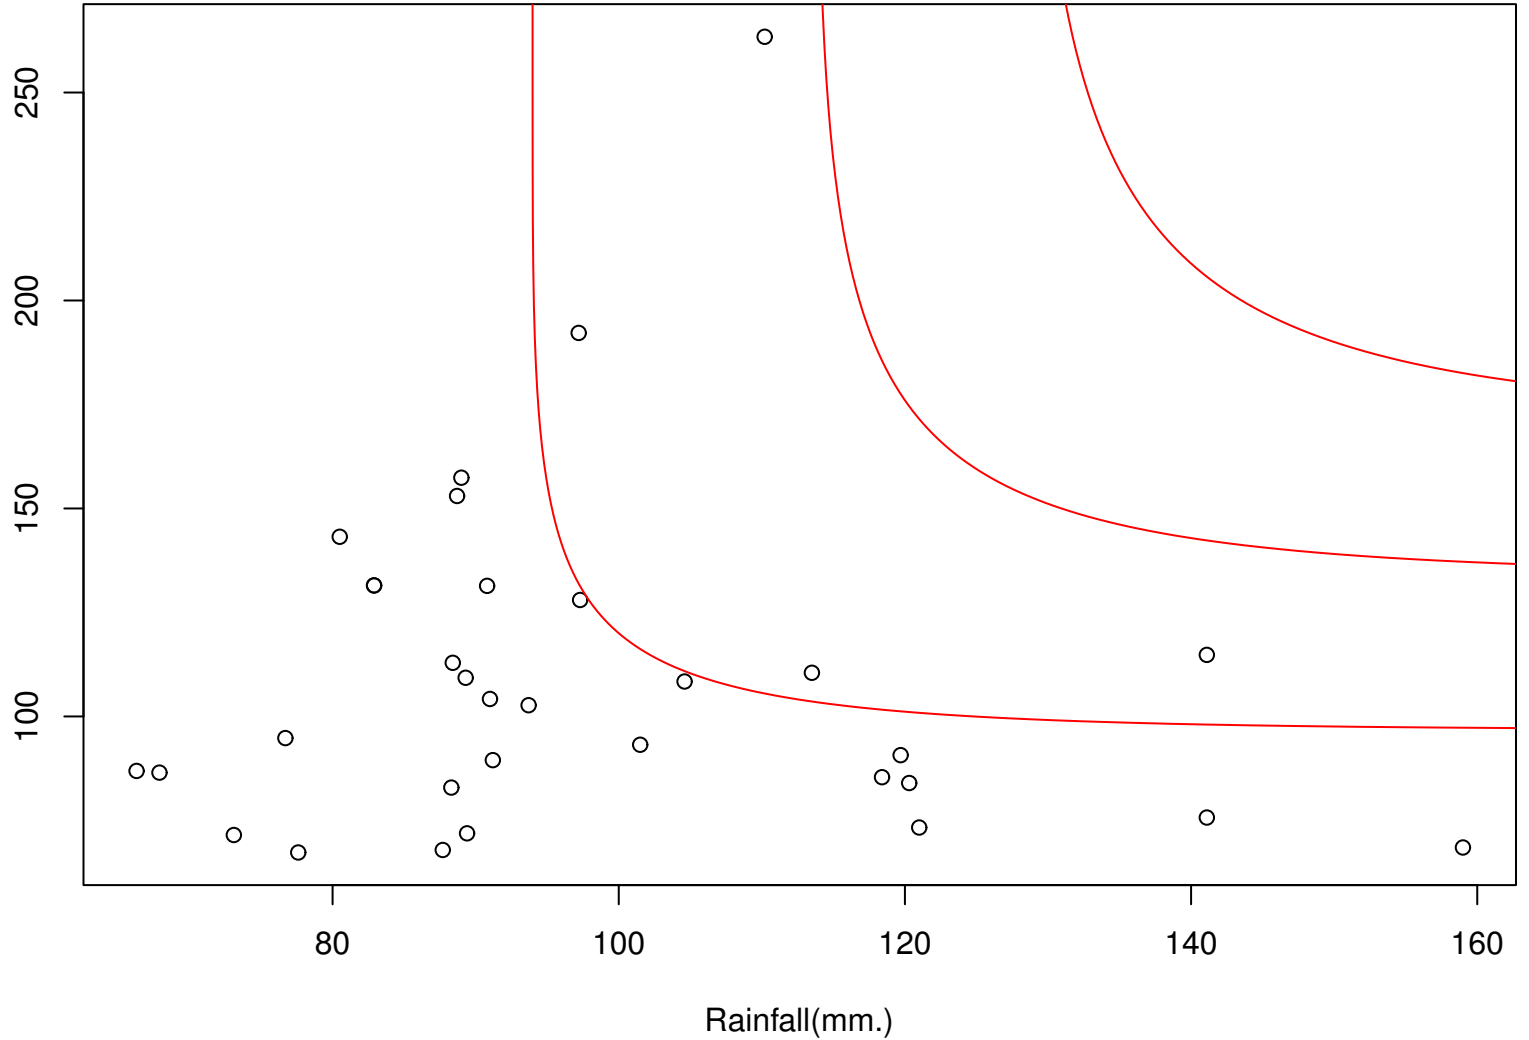

Supplement: s1 [file s1]

**Quantile curves**

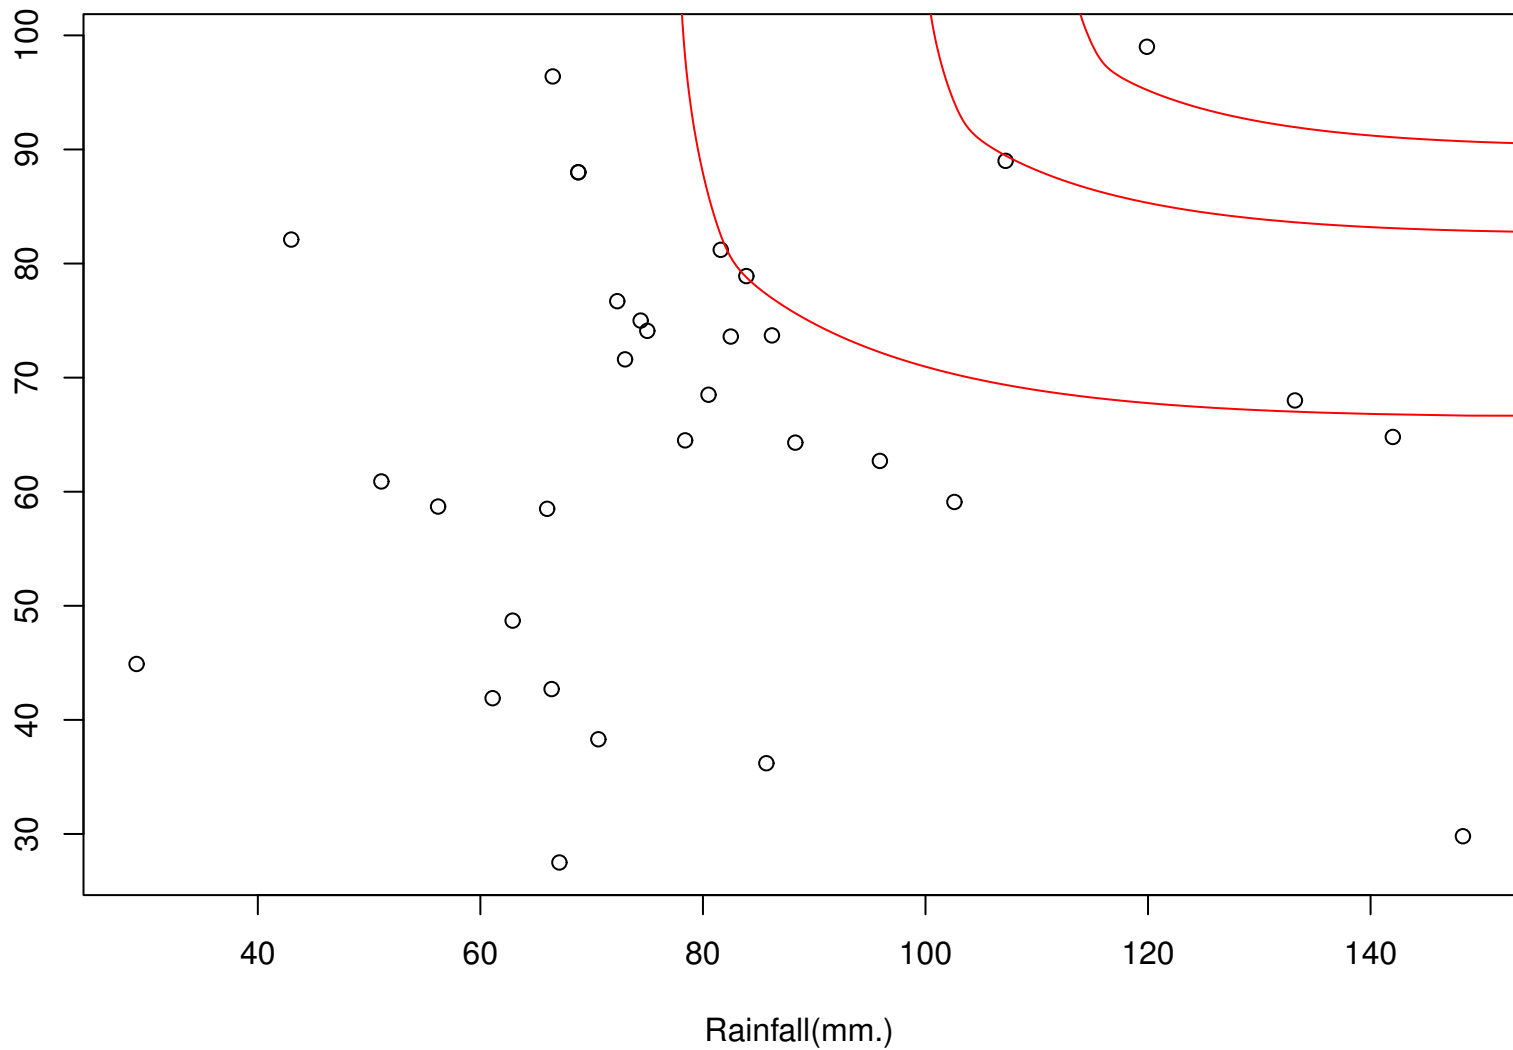

Supplement: s1 [file s1]

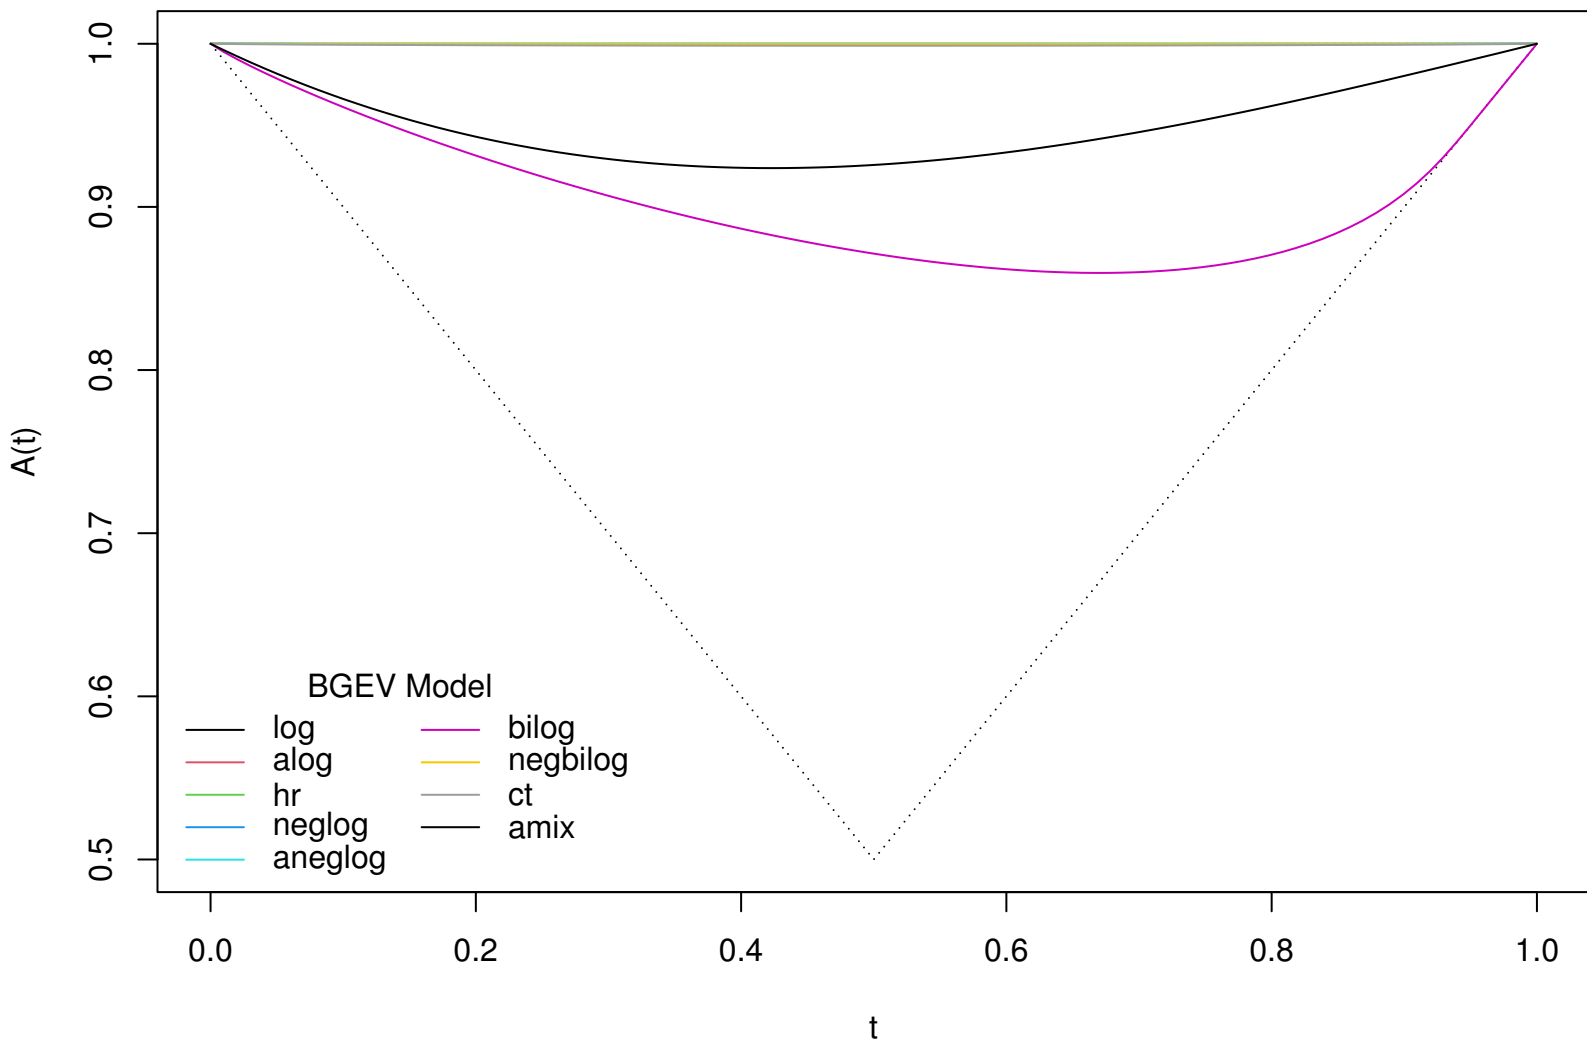

Supplement: s1 [file s1]

**Quantile curves**



Supplement: s1 [file s1]

**Quantile curves**

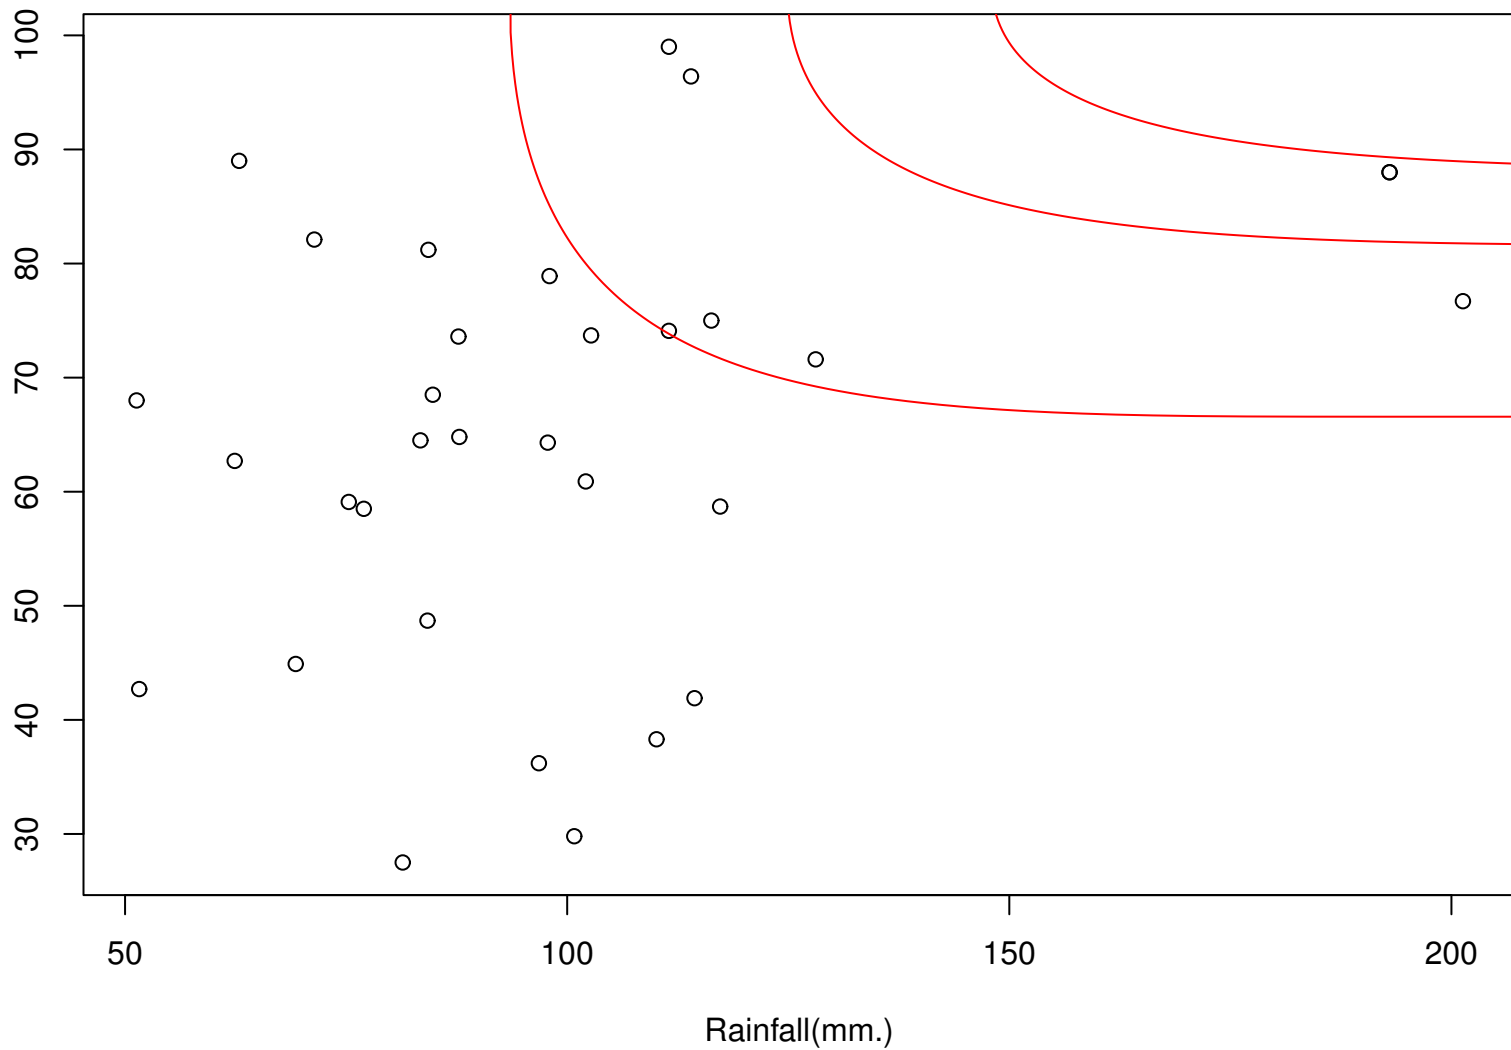

Supplement: s1 [file s1]

Quantile curves

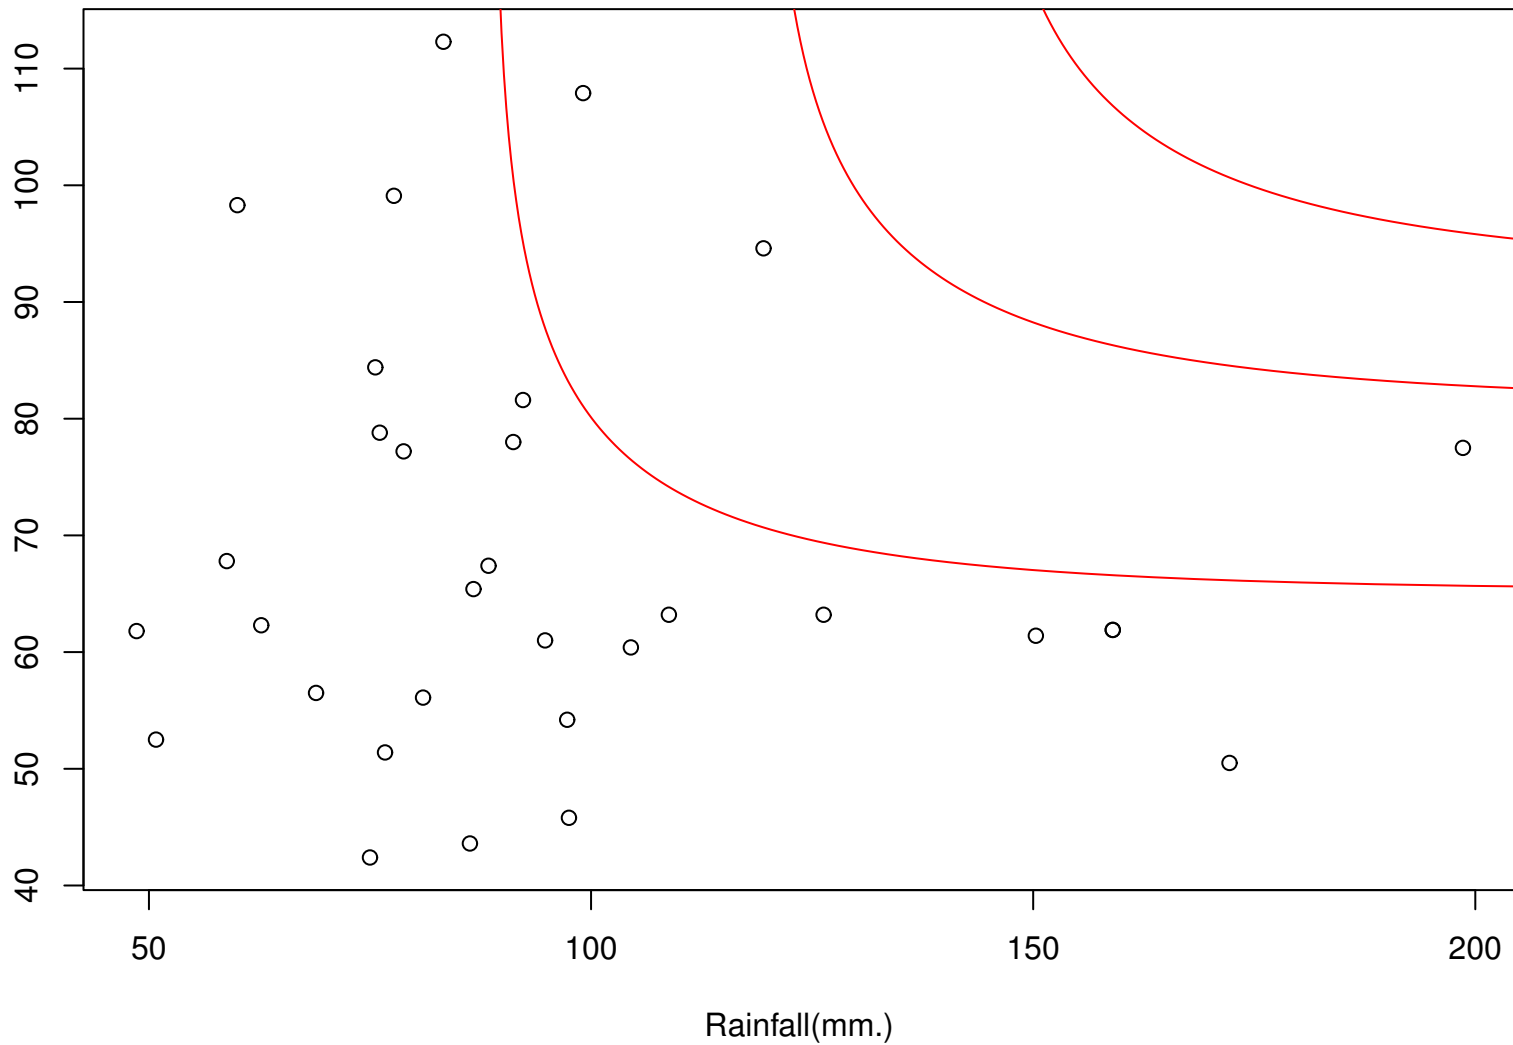

Supplement: s1 [file s1]

Quantile curves

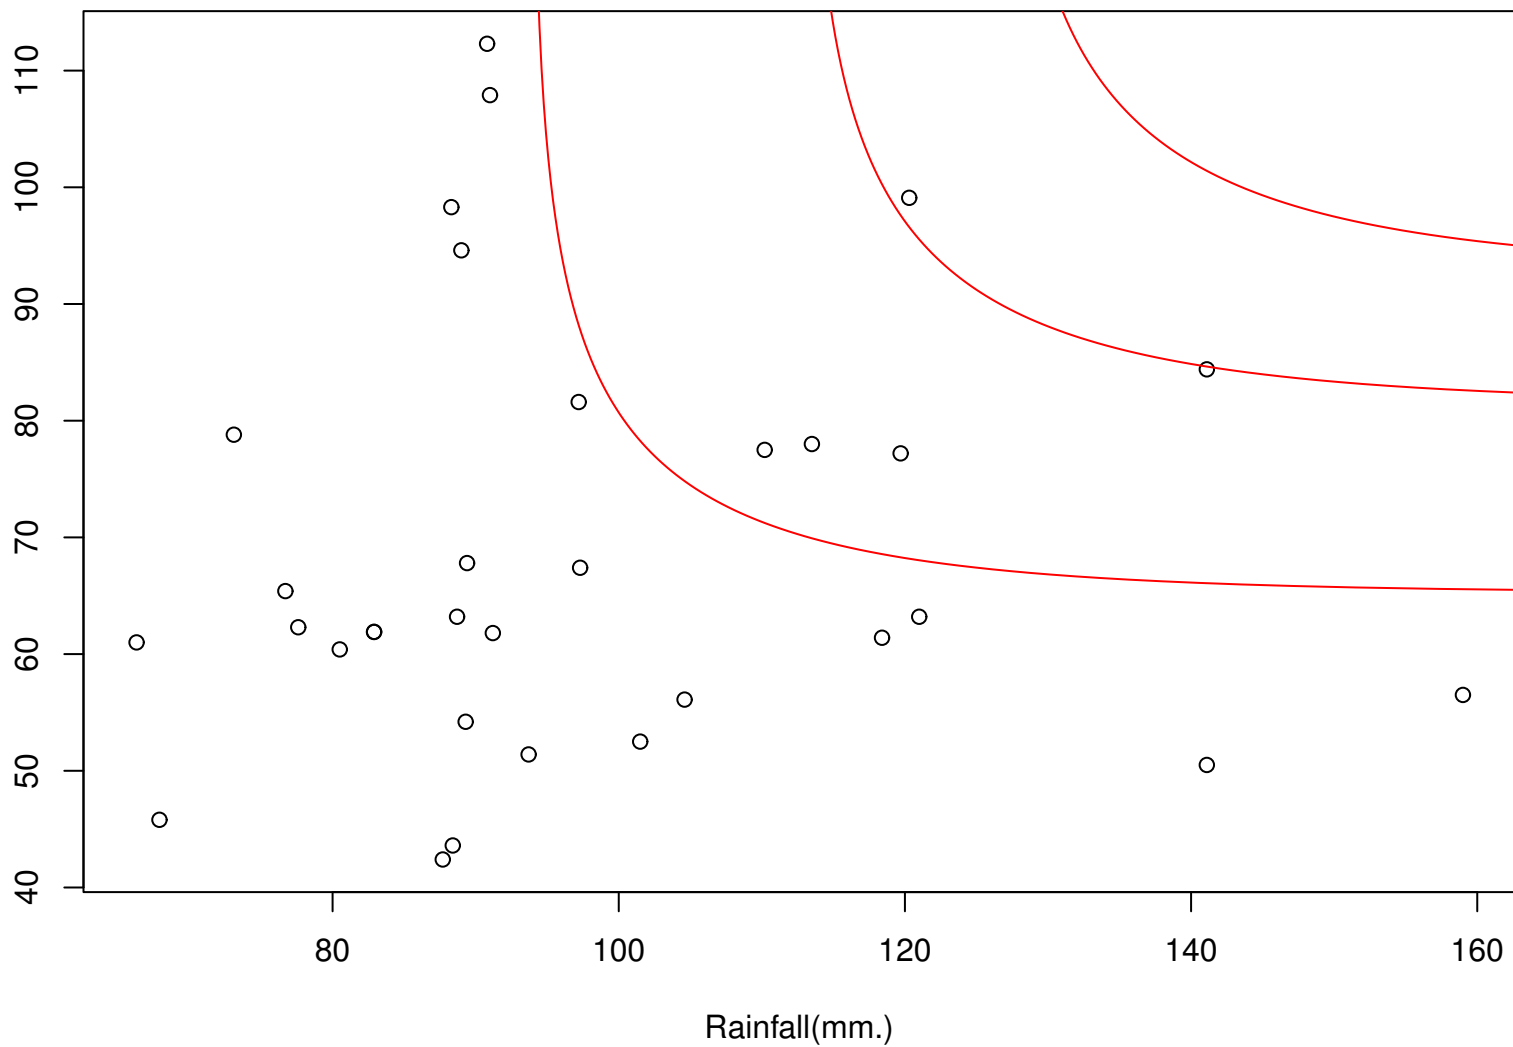

Supplement: s1 [file s1]

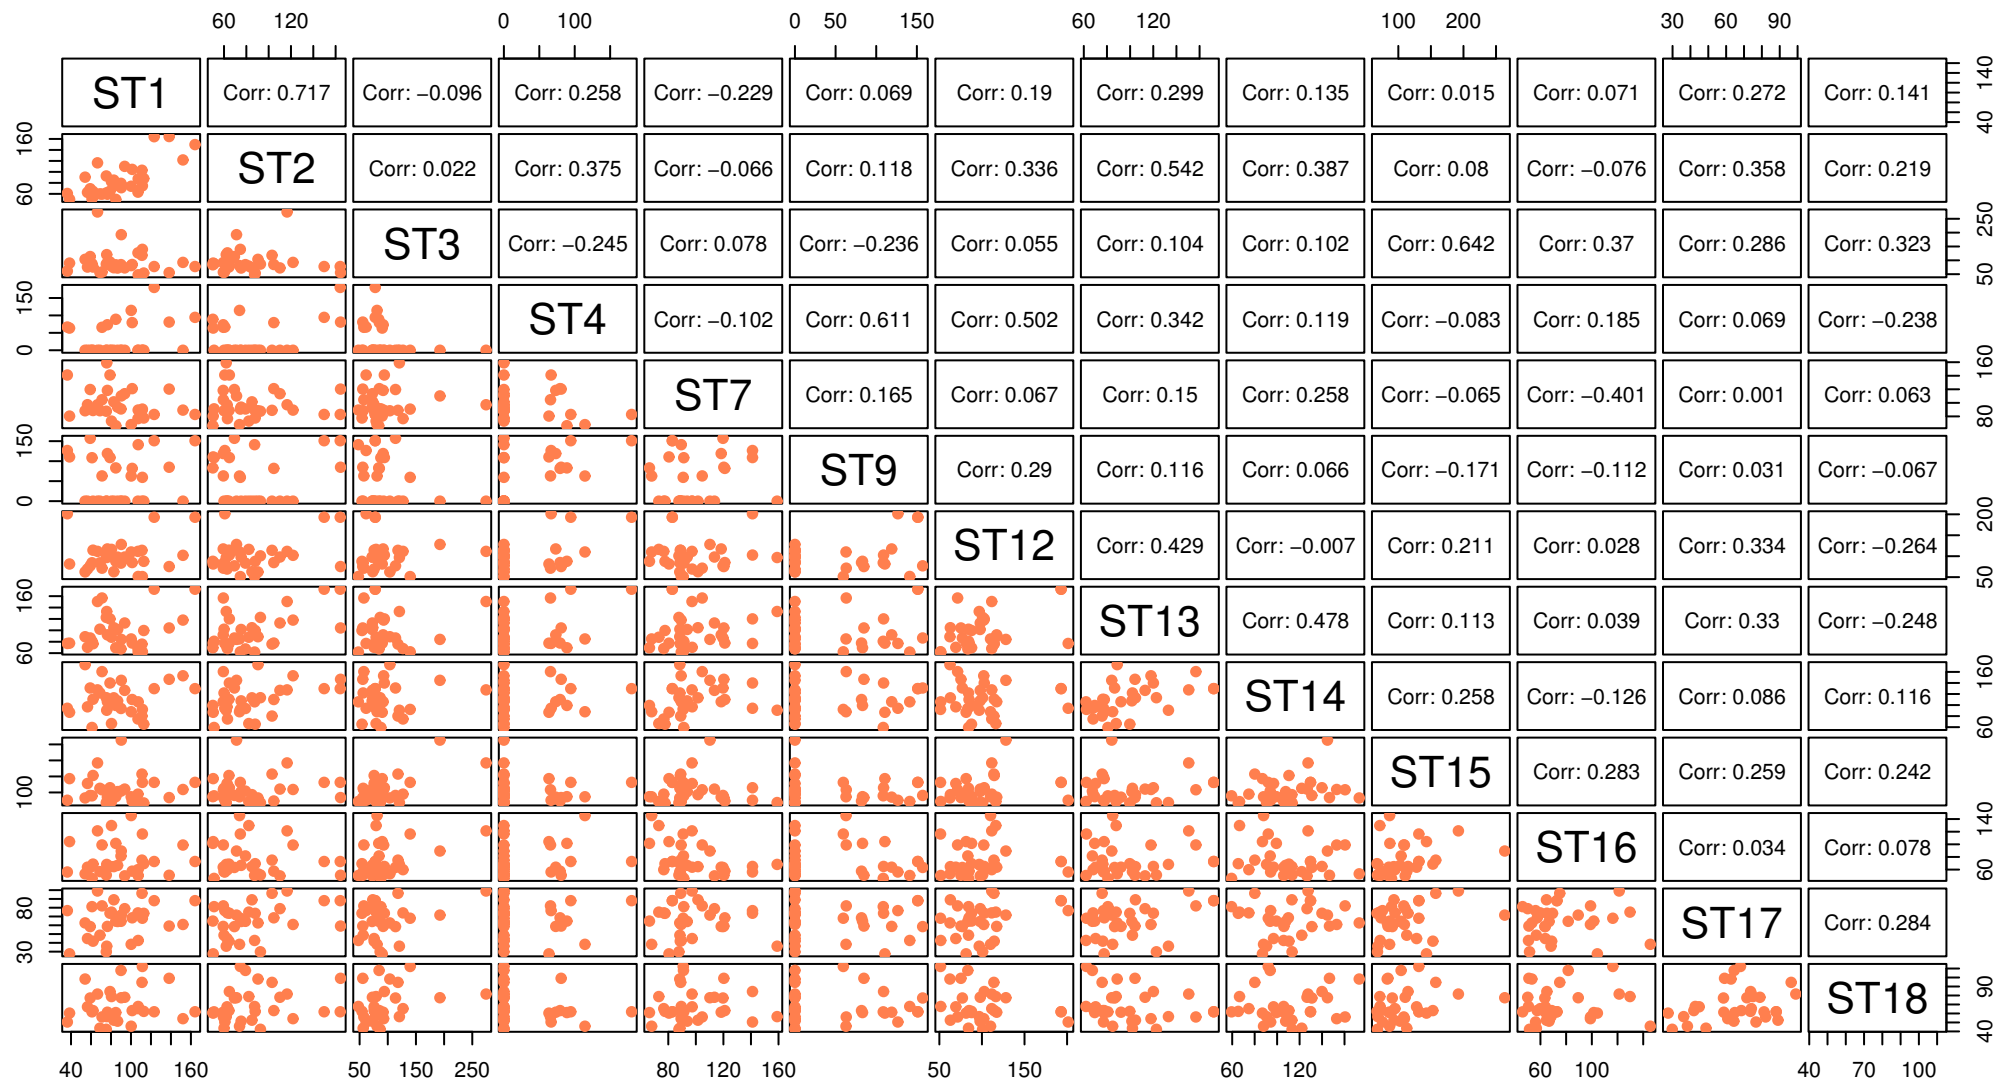

Supplement: s1 [file s1]

Quantile curves

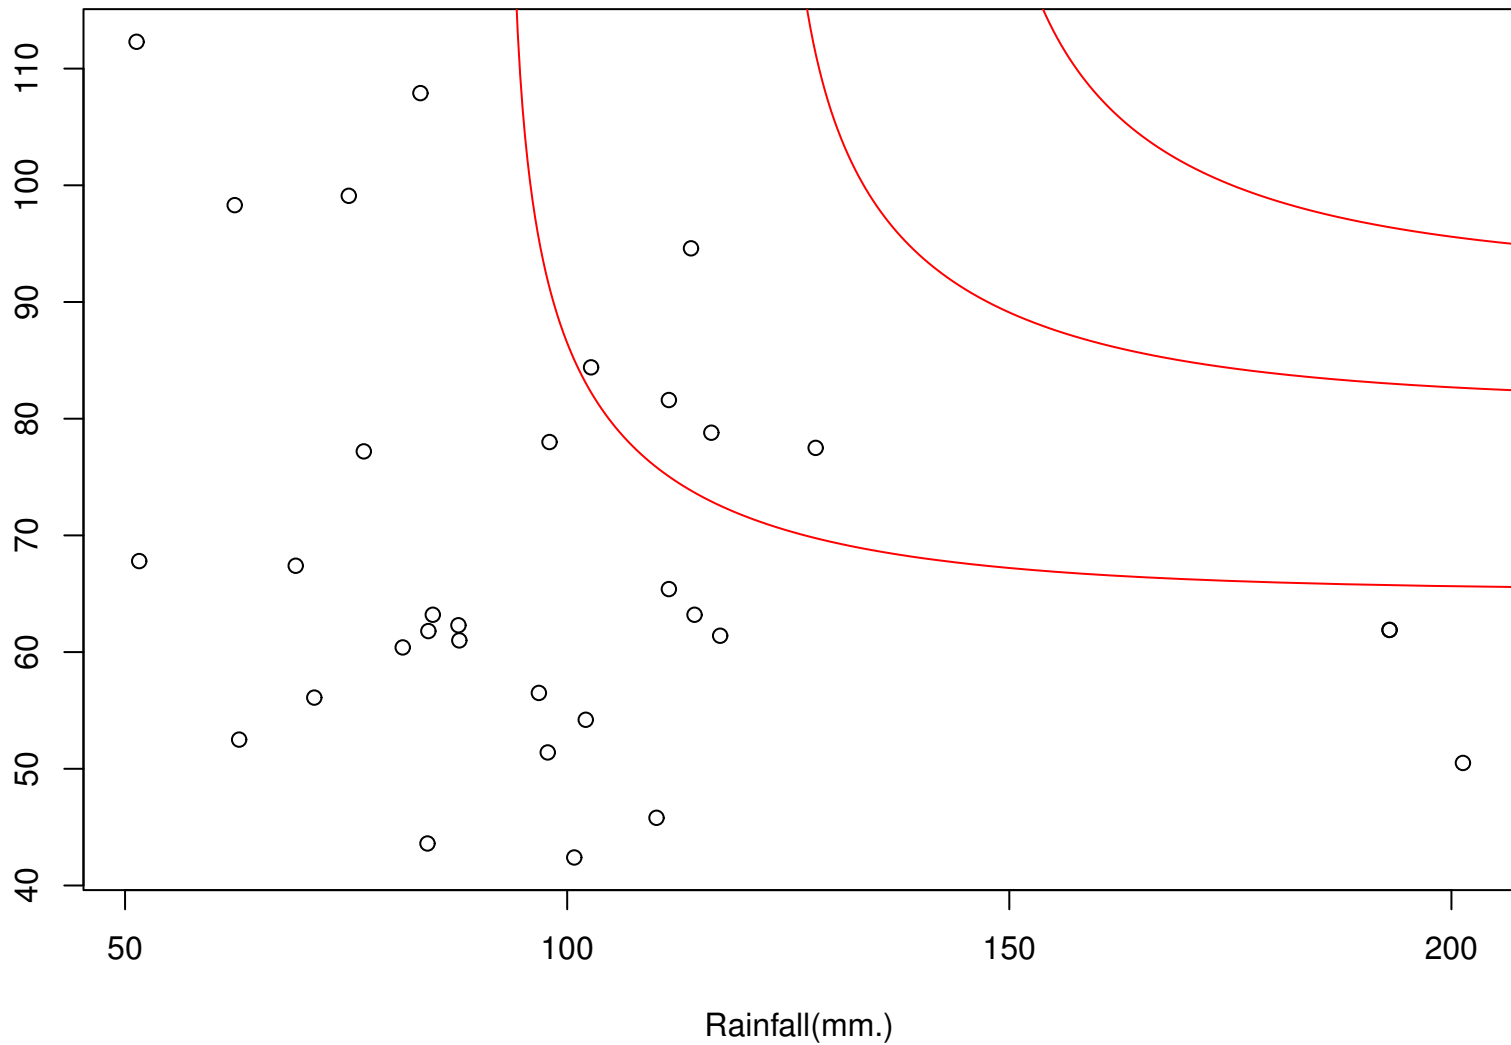

Supplement: s1 [file s1]

Quantile curves

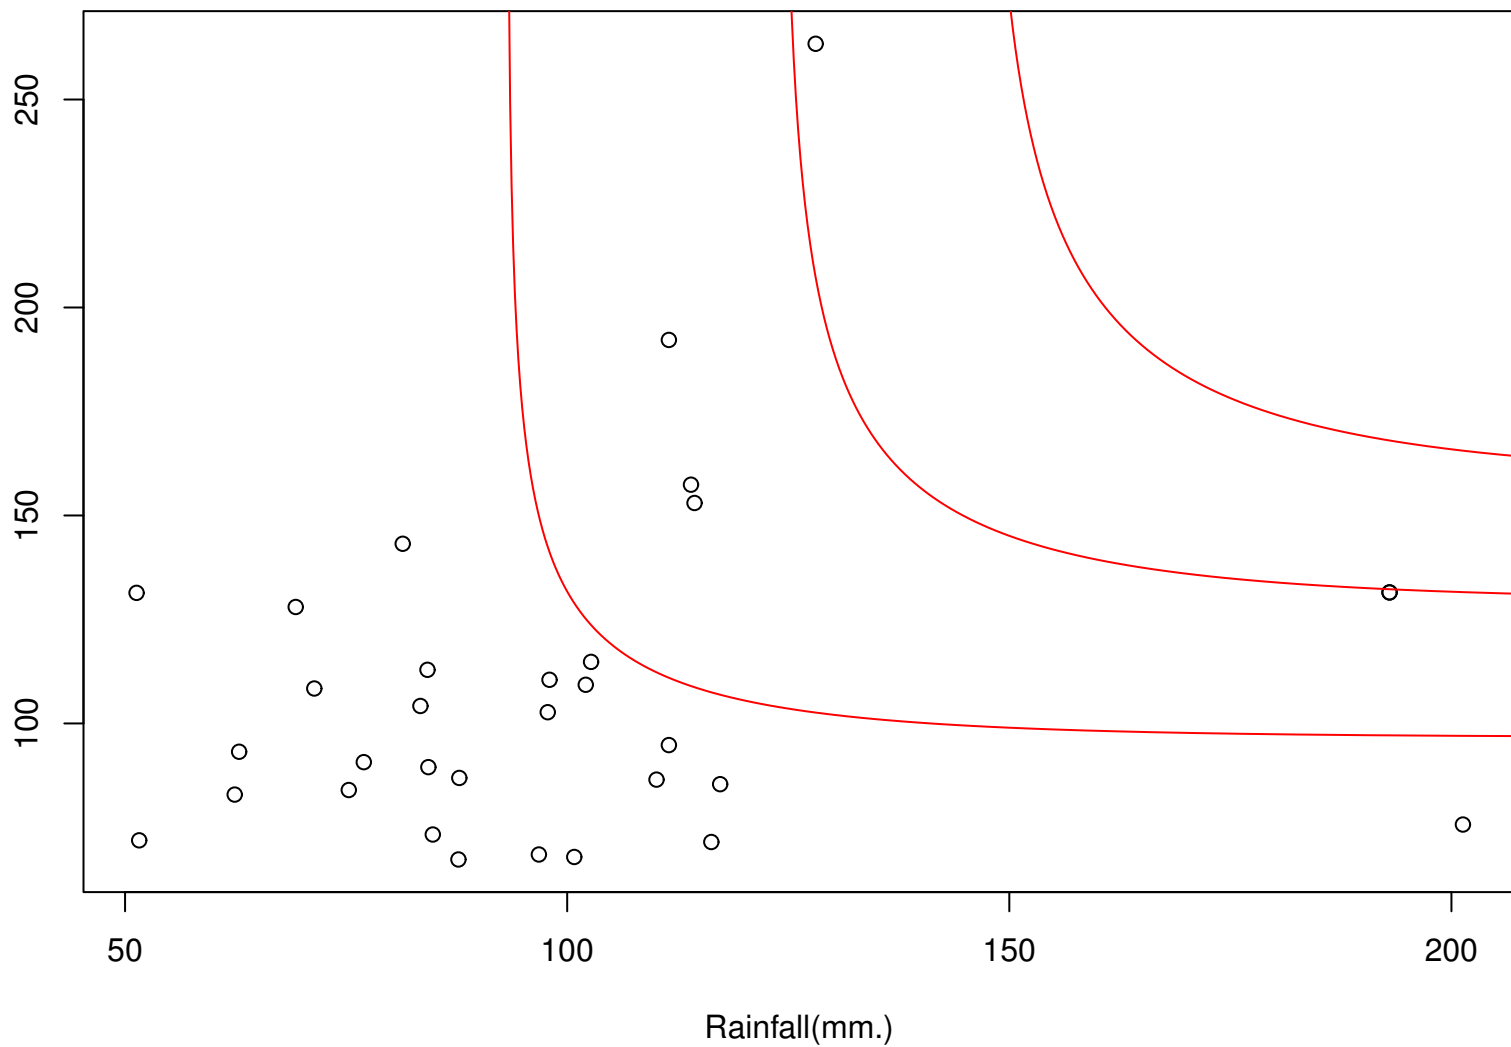

Supplement: s1 [file s1]

Quantile curves

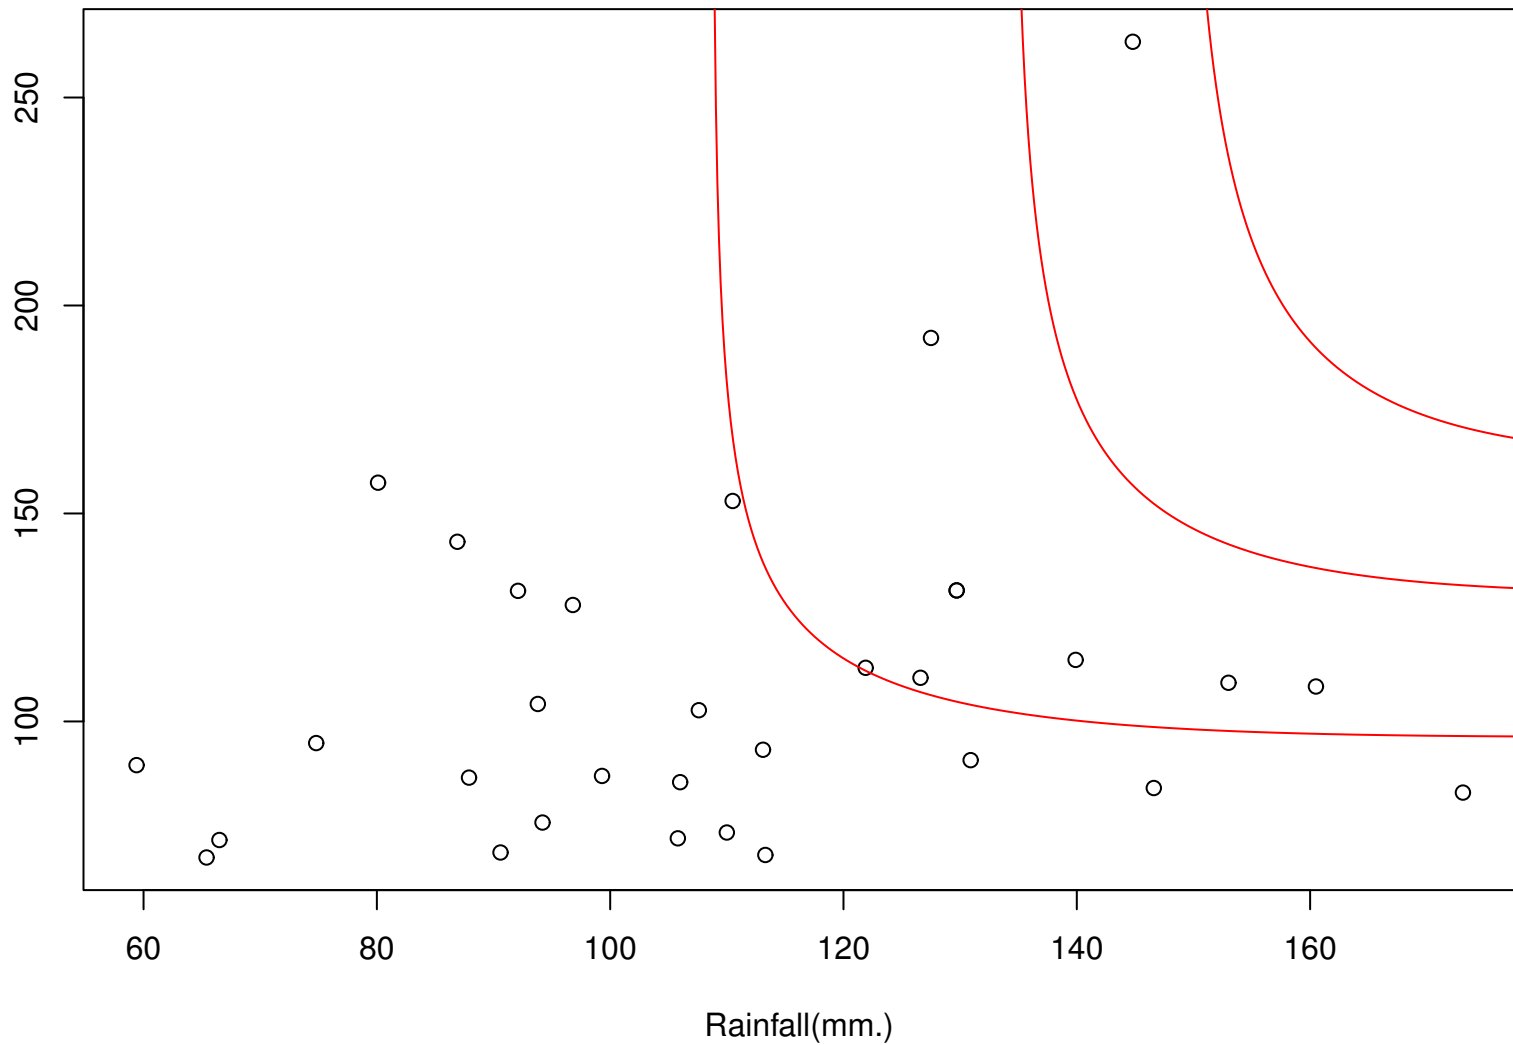

Supplement: s1 [file s1]

Quantile curves

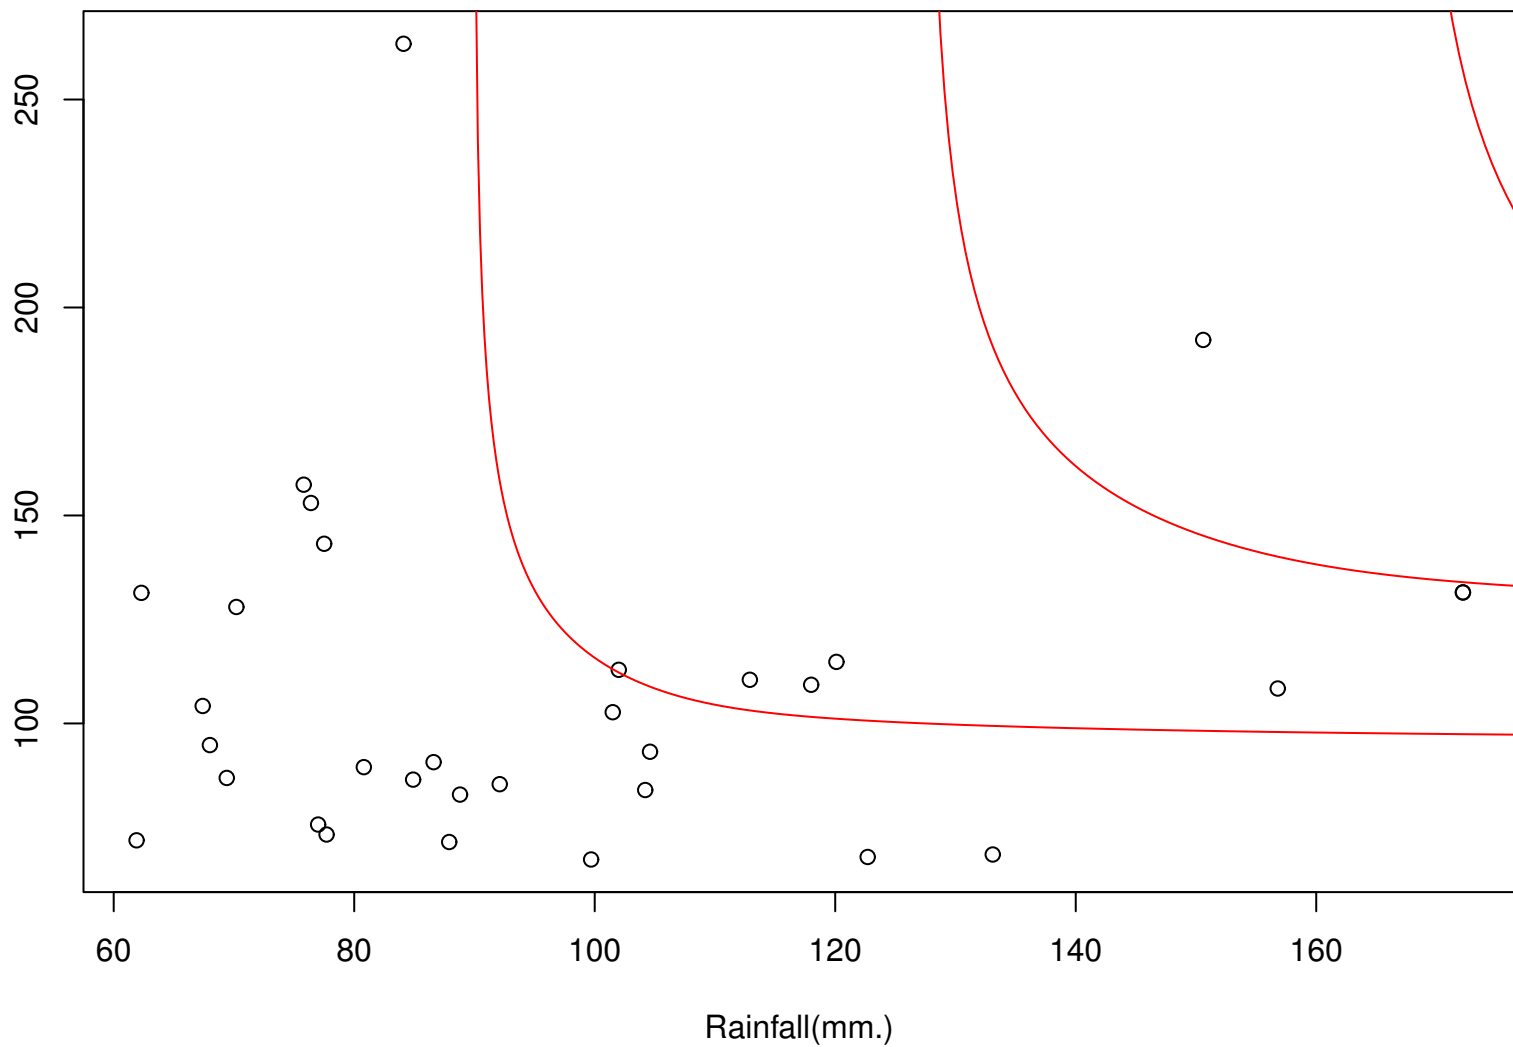

Supplement: s1 [file s1]

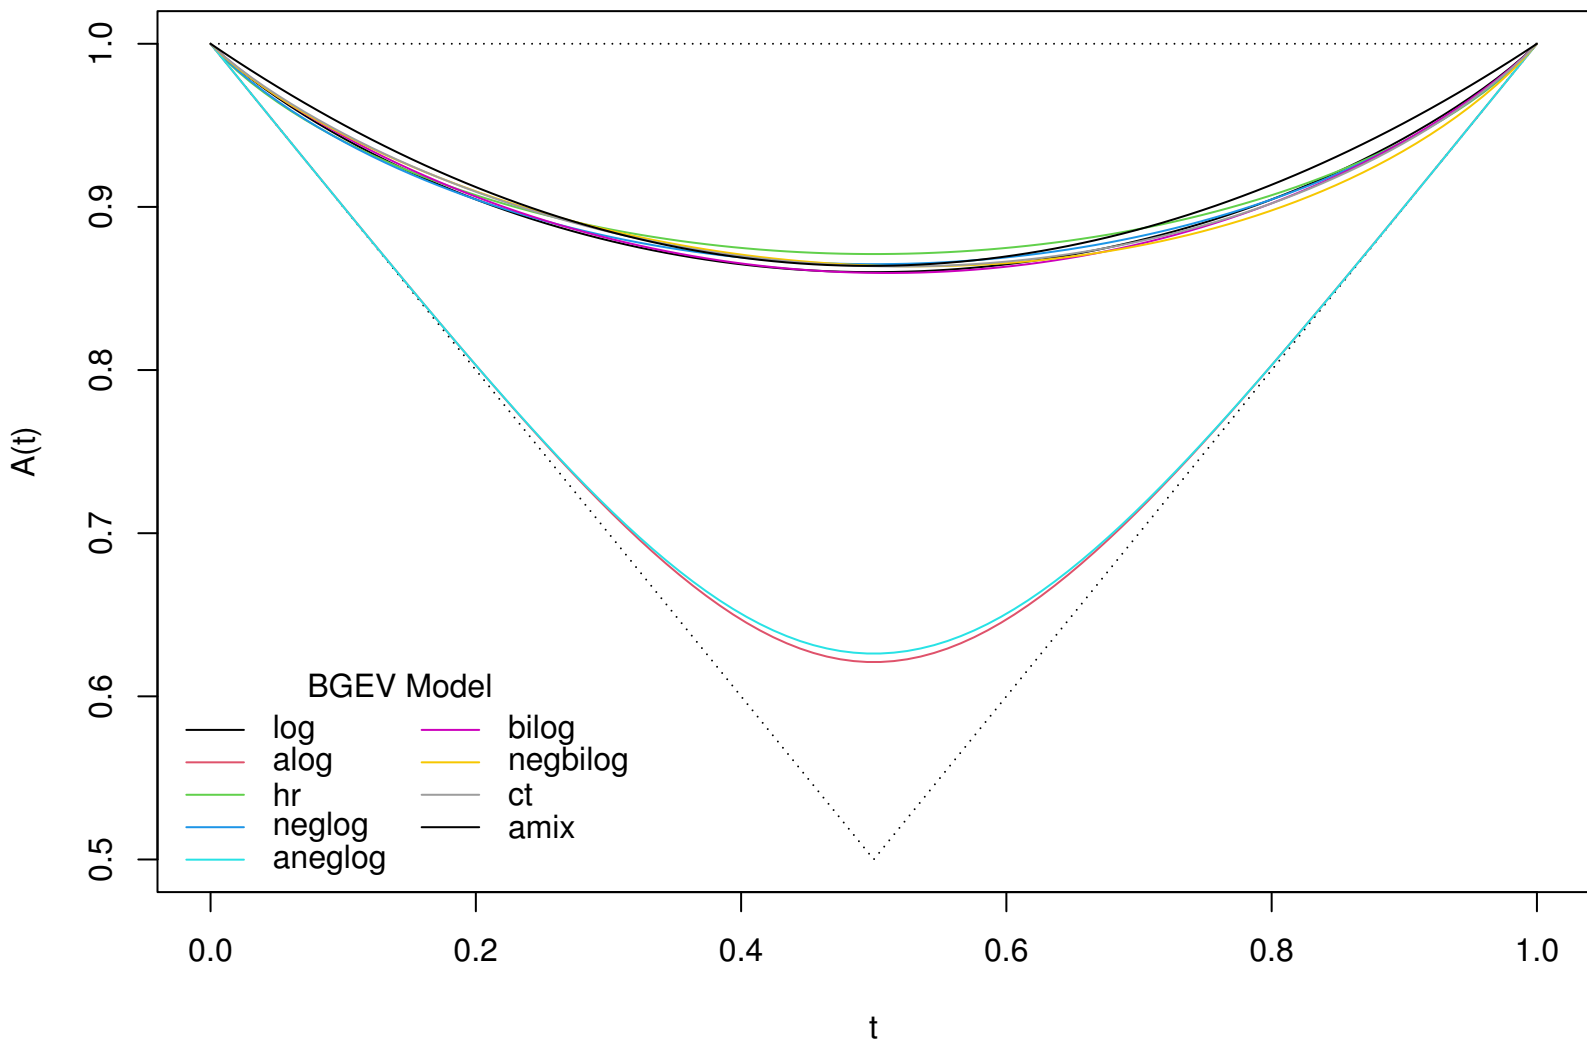

Supplement: s1 [file s1]
